# Supplementary material for: Reduced adult stem cell fate specification led to eye reduction in cave planarians
Source: PubMed Central journal article supplement (PMC11696554; doi:10.1038/s41467-024-54478-6), 2025-01-02
Supplement: 41467_2024_54478_MOESM1_ESM.pdf [file 41467_2024_54478_MOESM1_ESM.pdf]

## Supplementary Figures

**Figure S1. Triclad phylogeny based on four gene markers (COI, EF, 28S, and 18S rDNA type I and II) places *G. multidiverticulata* as closely related with others surface species of the genus *Girardia*.** Maximum Likelihood and Bayesian Inference trees inferred from concatenated dataset. Values at nodes correspond to posterior probability (Bayesian) and bootstrap values (Maximum Likelihood). Scale bar represents the number of substitutions per site.

**Figure S2. Eye-body allometry in cave and surface planarians. a)** Schematic representation of pharynx anatomy and the landmarks used for length measurements in fixed DAPI-labeled animals. Scale bar, 100  $\mu\text{m}$ . **b)** Simple linear regressions demonstrating cave planarian morphotypes and the surface planarian *G. dorocephala* present similar pharynx length-body size allometric scaling in fixed animals (*Gm*  $n=28$ ; *Gm(d)*  $n=19$ ; *Gd*  $n=29$ ). **c)** No significant difference in pharynx lengths between the fixed cave and surface planarians in small (1-3.5 mm in length - *Gm*  $n=14$ ; *Gm(d)*  $n=11$ ; *Gd*  $n=20$ ) and large (3.5-7 mm in length - *Gm*  $n=14$ ; *Gm(d)*  $n=8$ ; *Gd*  $n=9$ ) animals. Kruskal-Wallis followed by Tukey's multiple comparisons test. **d)** A significant difference was observed in the numbers of photoreceptor cells in cave planarians versus surface planarians in small (1-5.9 mm in length - *Gm*  $n=50$ ; *Gm(d)*  $n=52$ ; *Gd*  $n=32$ ; *Dj*  $n=22$ ; *Sm*  $n=20$ ) and large (6-14 mm in length - *Gm*  $n=36$ ; *Gm(d)*  $n=34$ ; *Gd*  $n=24$ ; *Dj*  $n=20$ ; *Sm*  $n=16$ ) planarians. *G. multidiverticulata* morphotypes present no differences in eye-body allometric scaling between each other. **e)** Similar overall brain lengths between cave and surface planarians in small (1-5.9 mm in length - *Gm*  $n=25$ ; *Gm(d)*  $n=27$ ; *Gd*  $n=16$ ; *Dj*  $n=11$ ; *Sm*  $n=10$ ) and large (6-14 mm in length - *Gm*  $n=18$ ; *Gm(d)*  $n=16$ ; *Gd*  $n=13$ ; *Dj*  $n=7$ ; *Sm*  $n=6$ ) animals. **f)** Overall similar pharynx lengths obtained through live images between the cave and surface planarians in small (0-5.9 mm in length - *Gm*  $n=25$ ; *Gm(d)*  $n=26$ ; *Gd*  $n=16$ ; *Dj*  $n=13$ ; *Sm*  $n=10$ ) and large (6-14 mm in length - *Gm*  $n=18$ ; *Gm(d)*  $n=17$ ; *Gd*  $n=13$ ; *Dj*  $n=5$ ; *Sm*  $n=6$ ) animals. Abbreviation, *Gm*, *G. multidiverticulata* non-discernible eye; *Gm(d)* *G. multidiverticulata* discernible eyes, *Gd*, *G. dorocephala*; *Dj*, *Dugesia japonica*; *Sm*, *Schmidtea mediterranea*. Mean  $\pm$  SD. For **d**, **e**, **f**, One-way ANOVA followed by Tukey's multiple comparisons test. Mean  $\pm$  SD. R, coefficient of determination. \*\* $p < 0.01$ , \*\*\*\* $p < 0.0001$ ; ns, not shown or not significant.

**Figure S3. Schematic view of the behavior essay. a)** Light-response behaviors were assessed in two different arenas: (i) the test arena contained 12 different light intensity bins that formed a gradient, from dark to light, and (ii) the control arena contained only one monochromatic shade of gray, i.e., a single intensity of light. Animals were placed at the start area in the middle of the arenas. **b)** Using a video camera fixed to an enclosed chamber to avoid the influence of external light variations, animals were recorded for five minutes. Created in BioRender. Saad, L. (2024) BioRender.com/f28z409. **c)** Image of the experiment with optical filters placed on top of the iPad.

**Figure S4. Differences in gene expression between cave planarian morphotypes and between cave and surface planarians. a)** *tyrosinase* expression in both cave morphotypes. Scale bars, 50  $\mu\text{m}$ . Representative images from  $n=5$  animals. **b)** Presence of normal eyes in *rx3* ( $n=10$ ) and *pax6A* ( $n=12$ ) RNAi animals in *G. multidiverticulata* (non-discernible eyes). Scale bar, 50  $\mu\text{m}$ . **c)** *pax6A* expression in nervous system cells but not in the eyes *G. multidiverticulata* (non-discernible eyes). Representative images from  $n=5$  animals. **d)** Schematic representation of single-eye RNA sequencing. Eyes from both morphotypes of *Girardia multidiverticulata*, as well as *Girardia dorocephala*, *Schmidtea mediterranea*, and *Dugesia japonica* were surgically isolated. RNA from each individual eye was extracted and libraries for each sample were prepared, resulting in a total of 12 libraries for *G. multidiverticulata* (discernible), 12 for *G. multidiverticulata* (non-discernible), 11 for *G. dorocephala*, 11 for *S. mediterranea*, and 13 for *D. japonica*. The transcriptome for each species eye was assembled and orthologs for 162 genes reported to be expressed in the *S. mediterranea* eye were predicted by multiple sequence alignment between the four species. Pair-wise comparisons between each cave and surface species were performed,

p-values were calculated by the default DESeq2 Wald test. Final data analyses include violin plots displaying the average expression levels of eye-related genes based on  $\log_2$  normalized counts and a heatmap showing differential gene expression comparing the single-eye data between each cave and surface species, as well as between the two cave morphotypes, using pair-wise DESeq2 Wald tests. Created in BioRender. Saad, L. (2024) BioRender.com/f28z409. **e**) Principal components of gene expression analysis between cave and surface species (*Gm*  $n = 12$ ; *Gd*  $n = 11$ ; *Dj*  $n = 13$ ; *Sm*  $n = 11$ ).

**Figure S5. Violin plots of  $\log_2$ -normalized counts of all eye-related genes of surface and cave planarians grouped by predicted functions, with genes described in Lapan & Reddien (2012).** Each dot represents the expression in a single-eye. In all graphs the species order is: *Girardia multidiverticulata* non-discernible eyes (dark blue), *Girardia multidiverticulata* discernible eyes (light blue), *Girardia dorocephala* (orange), *Dugesia japonica* (beige), and *Schmidtea mediterranea* (purple). (*Gm*  $n = 12$ ; *Gd*  $n = 11$ ; *Dj*  $n = 13$ ; *Sm*  $n = 11$ ). \* Marks the genes showing  $\text{padj} < 0.05$  in the DESeq2 Wald test pair-wise between surface and cave planarian. Complete statistical results presented in Supplementary Table 3.

**Figure S6. Reduced eye cell production in cave planarians** **a**) Max z-projection of EdU incorporation in 4, (*Gm*  $n=5$ , *Gd*  $n=5$ ), 8 (*Gm*  $n=4$ , *Gd*  $n=4$ ), and 12 (*Gm*  $n=6$ , *Gd*  $n=5$ ) days after soaking in surface and cave planarians. Whole animal (left panels) representing 4 days post-labeling. Images are from the main Figure 6a; they are shown here to label the locations for zoom-ins at right. Scale bar, 200  $\mu\text{m}$ . Right panels displaying the 100 x 100  $\mu\text{m}$  region used for counting the cell numbers in the whole z-projection in red. Scale bar, 50  $\mu\text{m}$ . **b**) During homeostasis *G. dorocephala* and *G. multidiverticulata* displayed similar overall numbers of EdU incorporation at 4 (*Gm*  $n=5$ , *Gd*  $n=5$ ), 8 (*Gm*  $n=4$ , *Gd*  $n=4$ ), and 12 (*Gm*  $n=6$ , *Gd*  $n=5$ ) days after EdU delivery in the different counting regions. **c**) The two cave morphotypes presented no differences in eye cell incorporation (*Gm*  $n=18$ ,  $n=9$ ,  $n=16$ , *Gm(d)*  $n=13$ ,  $n=12$ ,  $n=13$ , for 4, 8 and 12 days respectively). Intervals were compared with a Mann-Whitney two-tailed t test **d**) Max z-projection of the head showing *pkd11-2* expression in *G. dorocephala* ( $n=12$ ) and *G. multidiverticulata* ( $n=12$ ). EdU<sup>+</sup>; *pkd11-2*<sup>+</sup> double-positive cells were counted from the maximal extension of the brain until the end of the animal head. **e**) Max z-projection of whole animal *piwi-1* FISH images in *G. dorocephala* and *G. multidiverticulata*. This image is from main Figure 6a, it is shown here to label the locations for zoom ins. Scale bar, 500  $\mu\text{m}$ . The region where these cells were quantified is highlighted and showed in detail in upper right panels (Scale bar, 50  $\mu\text{m}$ ). Lower right panels show the three-dimensional reconstruction confocal whole-mount FISH z-stacks using Imaris software. Shown is the segmentation of DAPI<sup>+</sup> cells (gray) and *piwi-1*<sup>+</sup> cells (magenta) (Scale bar, 5  $\mu\text{m}$ ). **f**) Percentage of *piwi-1*<sup>+</sup> cells are similar between *G. dorocephala* ( $n=5$ ) and *G. multidiverticulata* ( $n=6$ ). **g**) *agat-3* expression shown in a visual plane, demonstrating co-localization with DAPI, used as reference for counting. Representative images from  $n=10$  animals for each species. Scale bar, 50  $\mu\text{m}$ . *Gm*, *G. multidiverticulata* non-discernible eye; *Gm(d)* *G. multidiverticulata* discernible eyes, *Gd*, *G. dorocephala*. Intervals were compared with a Student's two-tailed t test, ns, not significant. Mean  $\pm$  SD

**Figure S7. Irradiation experiments.** **a**) Left panels: *FoxA* expression in *G. dorocephala* and *G. multidiverticulata* showing progenitors located anteriorly to the pharynx, but not in other regions close to the head. Right panels: *FoxA* expression depletion after irradiation in the prepharyngeal, counted region. Panels with DAPI labeling represent only one visual plane. Panels with only *FoxA* labeling are max z-projections, red boxes represent the region used for counts. Green box shows the detail of pharyngeal *FoxA*<sup>+</sup> cells. The pharynx is marked in blue. Scale bar, 50  $\mu\text{m}$ . **b**) Neoblast depletion after irradiation in *G. dorocephala* (two left panels) and *G. multidiverticulata* (two right panels); *piwi-1*<sup>+</sup> cells are scattered throughout the body of planarians (left panels for each species) and are absent in irradiated animals (right panels for each species). Scale bar, 50  $\mu\text{m}$ . **c**) Live images of animals 0, 8, and 12 days after irradiation, demonstrating that eyes are still present. Scale bar, 1 mm. *Gm*, *G. multidiverticulata* non-discernible eye;

*Gm*(d) *G. multidiverticulata* discernible eyes, *Gd*, *G. dorotocephala*. Intervals were compared with a Student's two-tailed t test. test, \*\*\*\*p < 0.0001; \*\*p < 0.01 ns, not significant.

## Supplementary Tables

**Table S1.** List of Dugesiidae and outgroup species used for phylogenetic analyses (see Fig. S1) with respective accession numbers.

**Table S2.** *Girardia multidiverticulata* sequences generated in this study and used in the phylogenetic analyses.

**Table S3.** Results of the differential gene expression analysis in planarian eye-related gene orthologs, showing the enriched genes for each comparison. Genes were annotated by alignment with eye-related genes previously reported (Lapan & Reddien 2012). Genes used was considering  $p_{adj} < 0.05$ , and either up-regulated ( $\log_2\text{FoldChange} > 1$ ) or down-regulated ( $\log_2\text{FoldChange} < -1$ ). DESeq2 Wald test pair-wise comparison between: **(a)** *G. multidiverticulata* non-discernible eyes and *G. multidiverticulata* discernible eyes; **(b)** *G. dorotocephala* and *G. multidiverticulata* morphotypes; **(c)** *D. japonica* and *G. multidiverticulata* morphotypes; **(d)** *S. mediterranea* and *G. multidiverticulata* morphotypes.

**Table S4.** Genes and sequences that were used in fluorescence *in situ* hybridization, together with primers used for cloning.

**Table S5.** Sequence of each probe, including initiator and spacer sequences used in *in situ* Hybridization Chain Reaction.

Maximum Likelihood

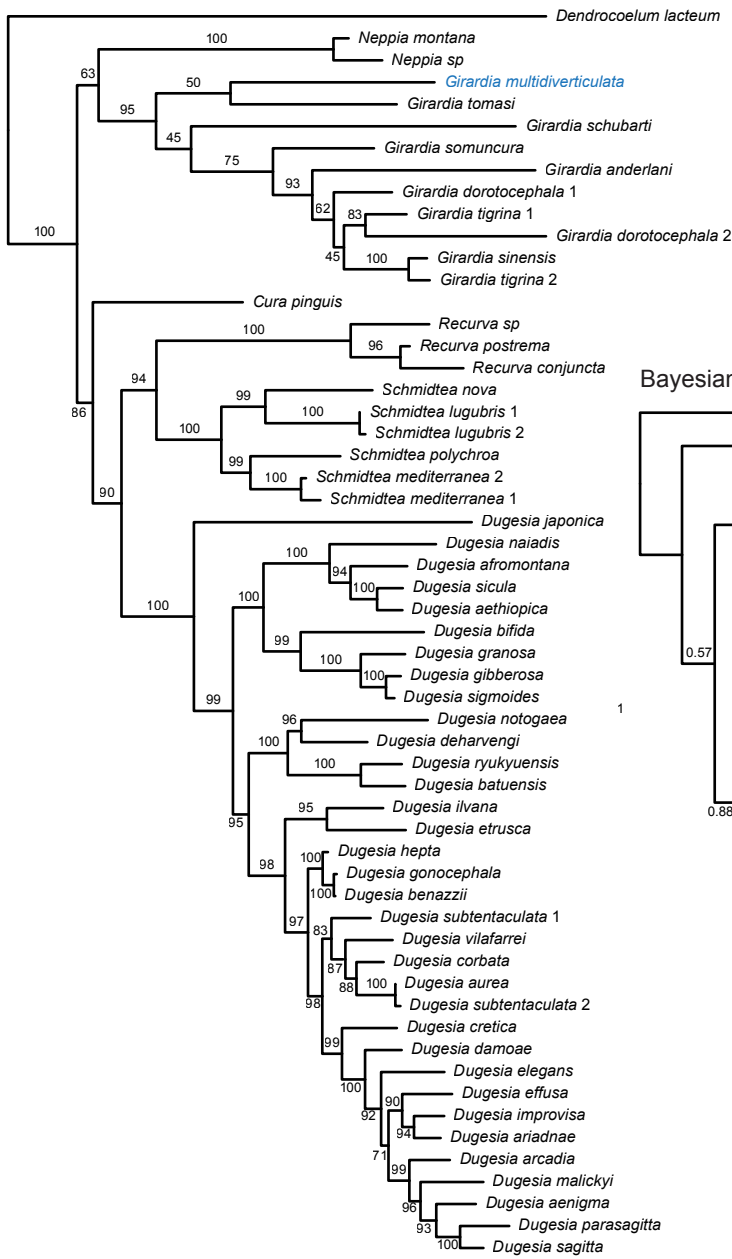

Bayesian

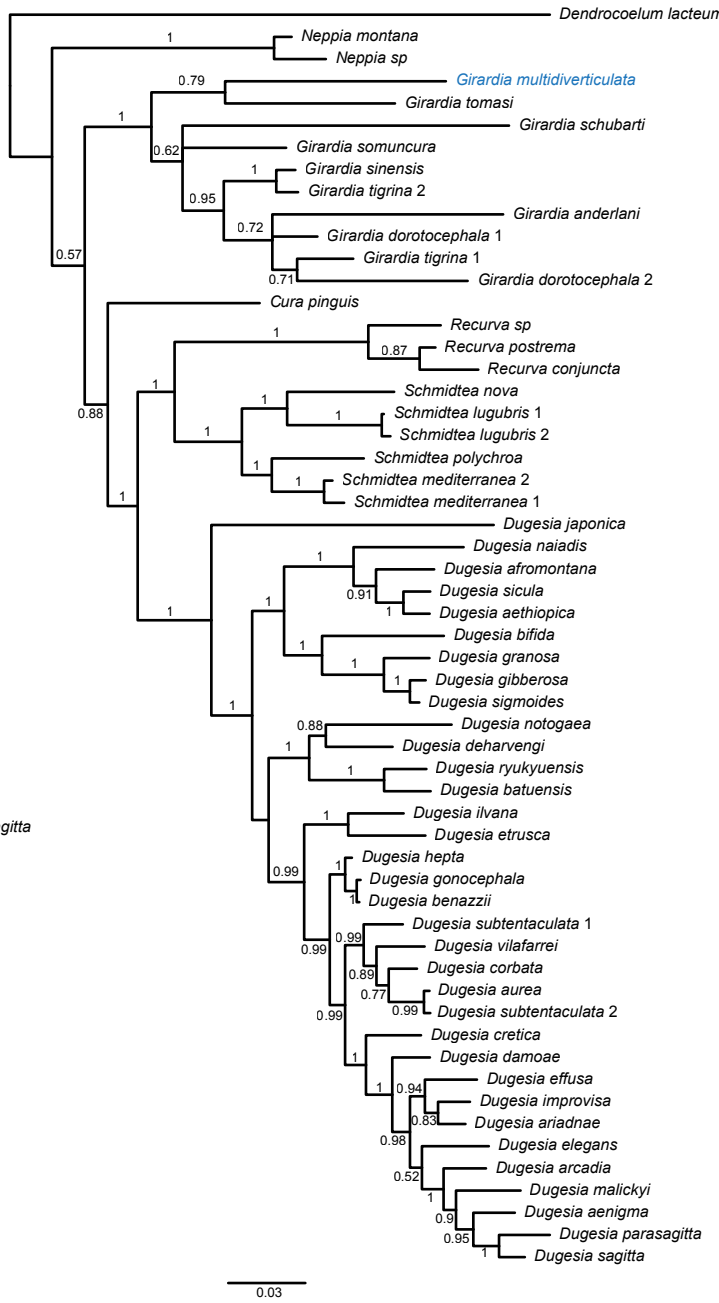

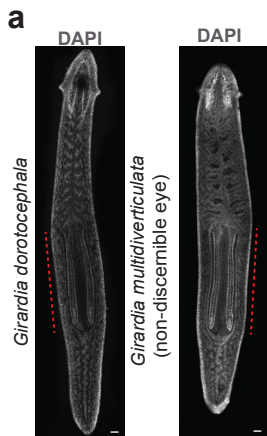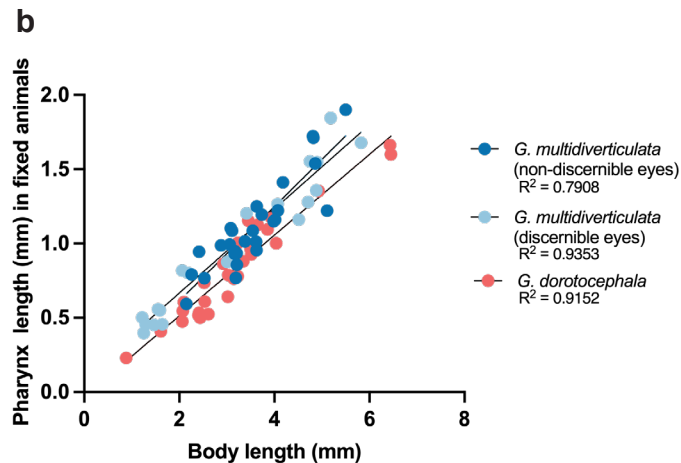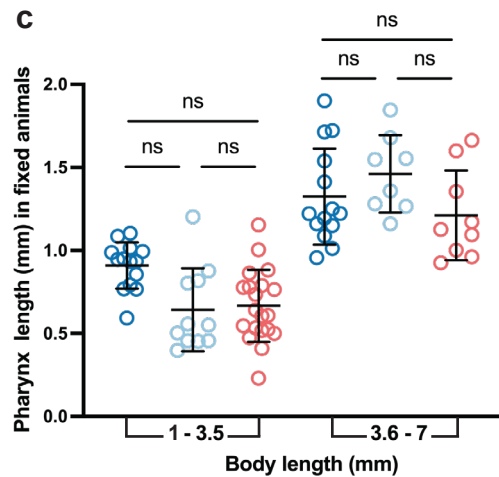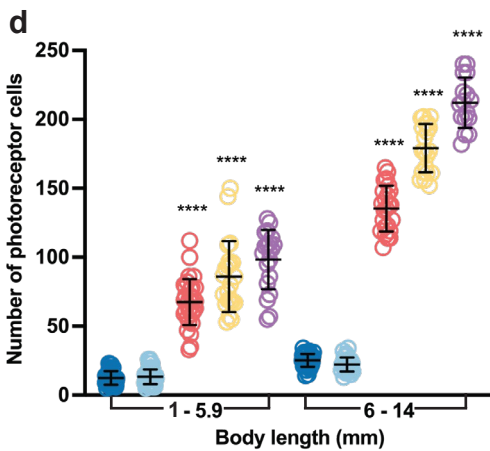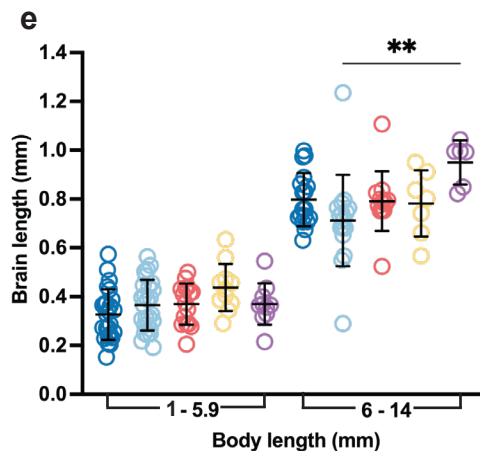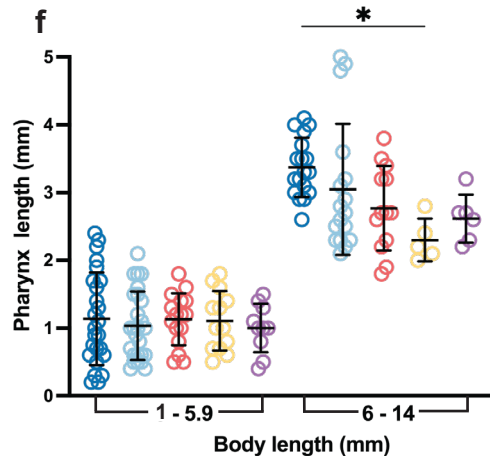

● *Girardia multidiverticulata* (non-discernible eye)    ● *Girardia multidiverticulata* (discernible eye)    ● *Girardia dorocephala*    ● *Dugesia japonica*    ● *Schmidtea mediterranea*

**a**

Test Arena

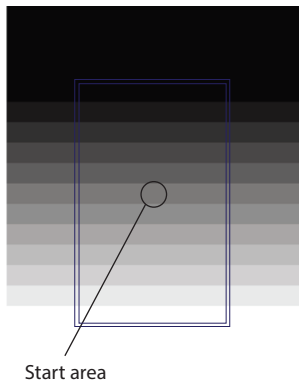

Control Arena

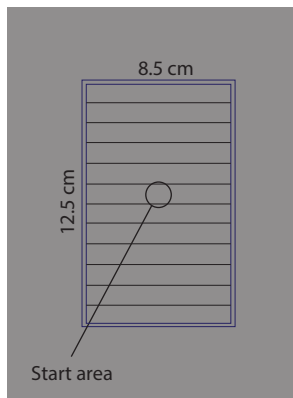**b**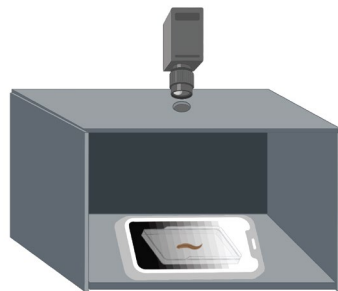**c**

Red Arena (~625 nm)

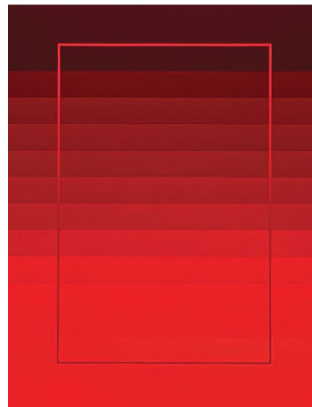

Green Arena (~517 nm)

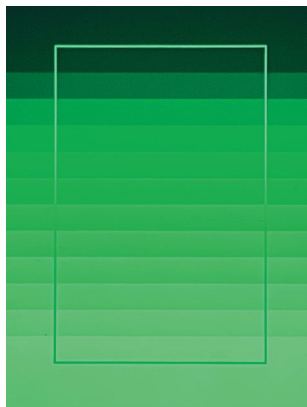

Blue Arena (~465 nm)

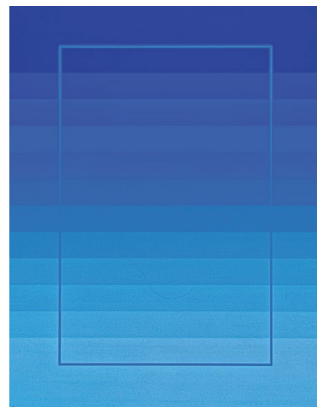

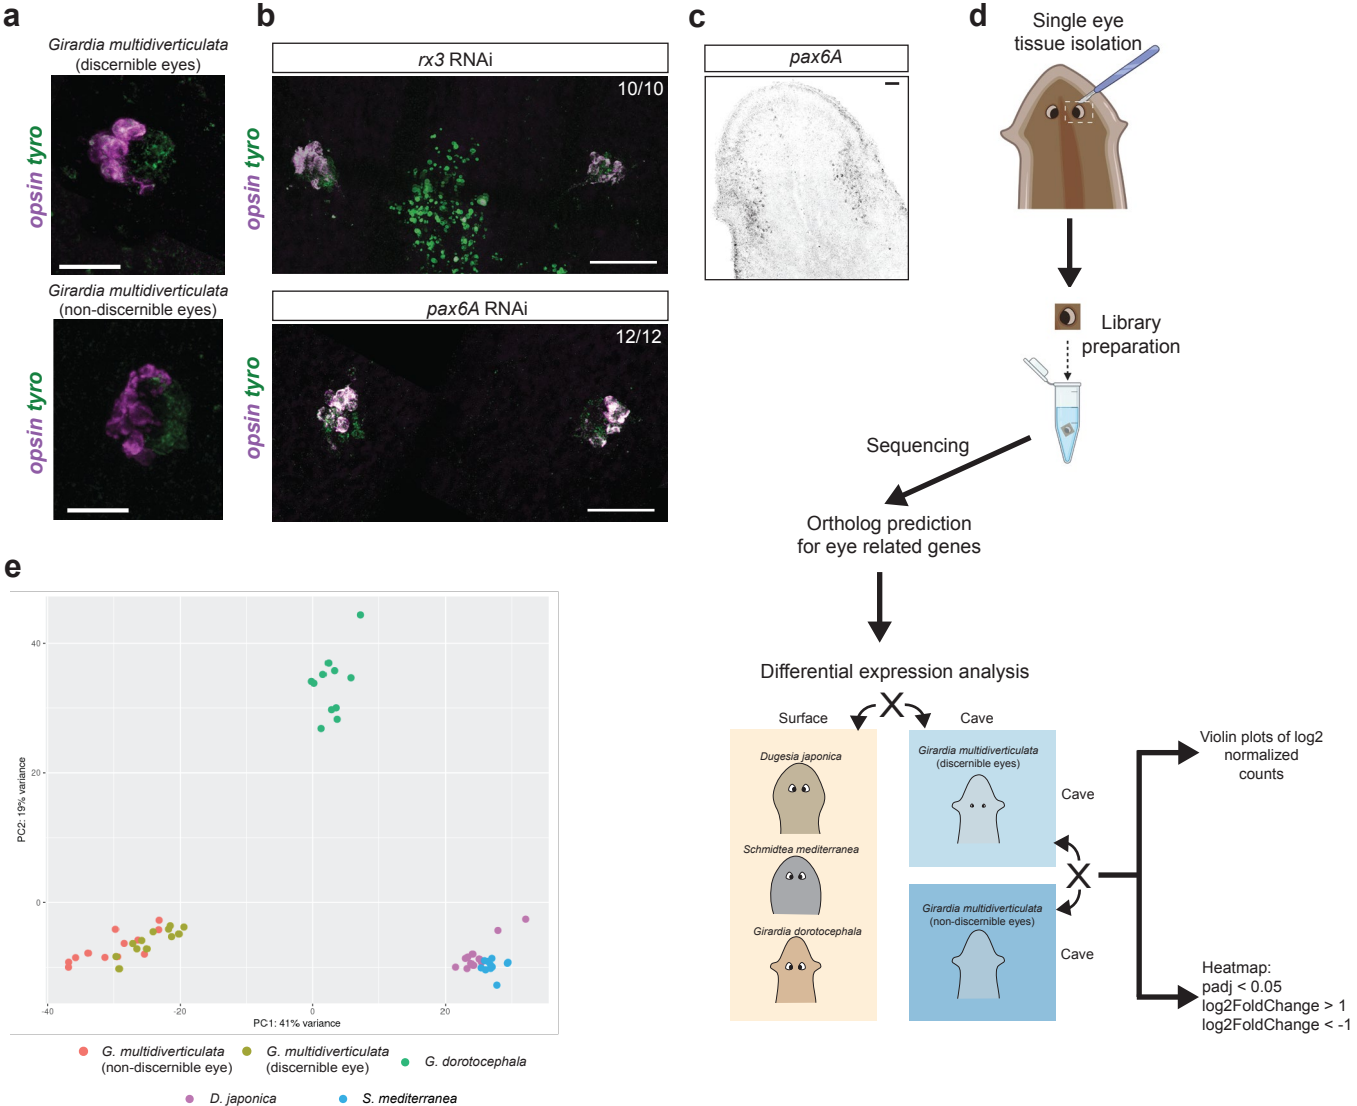

melanin synthesis

pigmentation  
maintainence

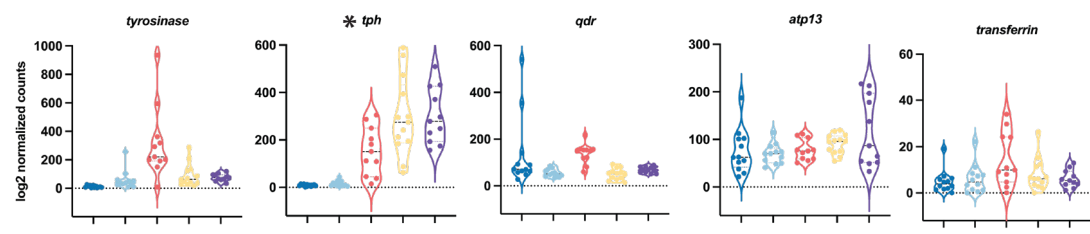

melanin synthesis

pigmentation  
maintainence

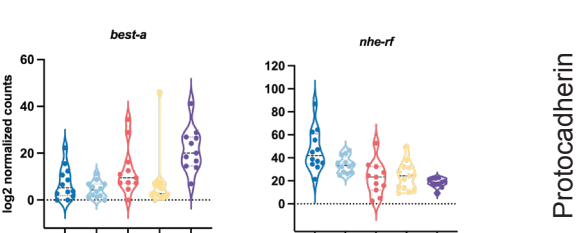

Protocadherin

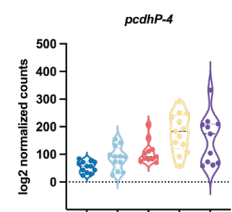

Signaling receptors

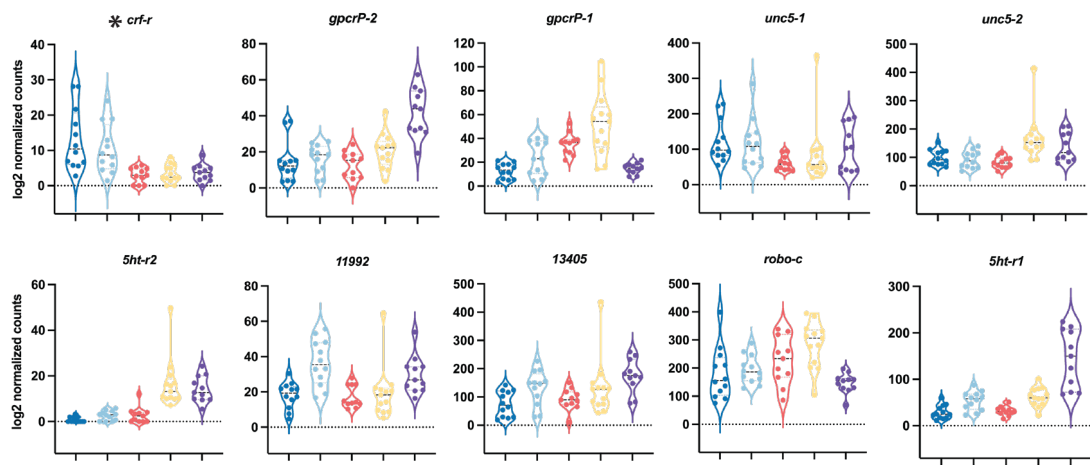

Phototransduction

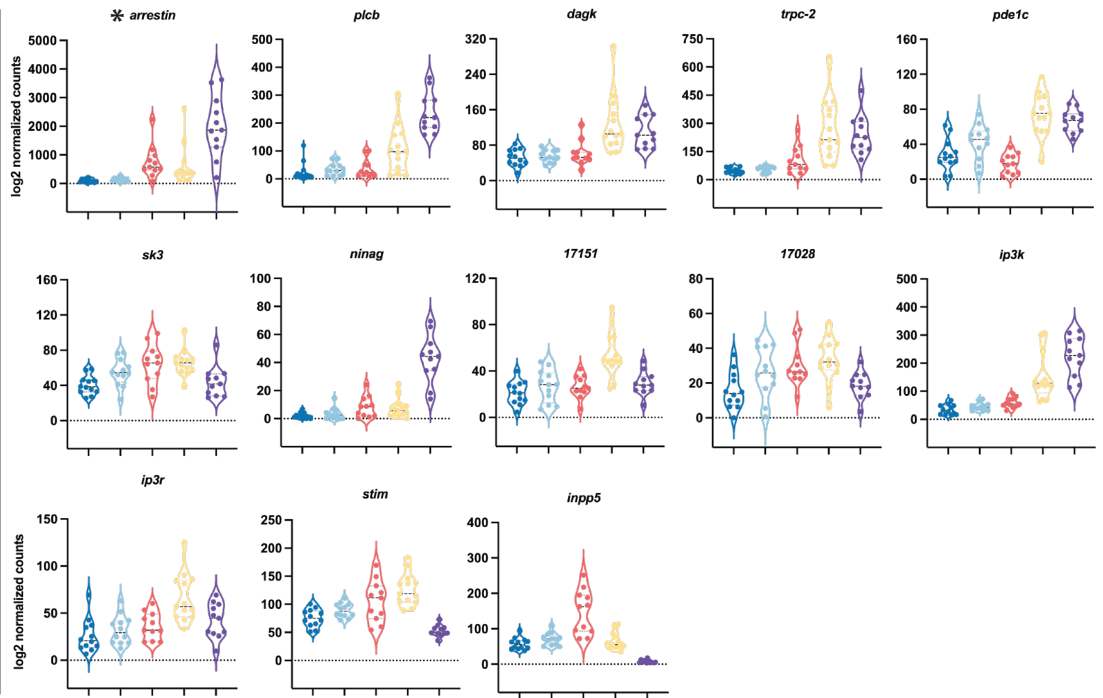

Transcription Factors

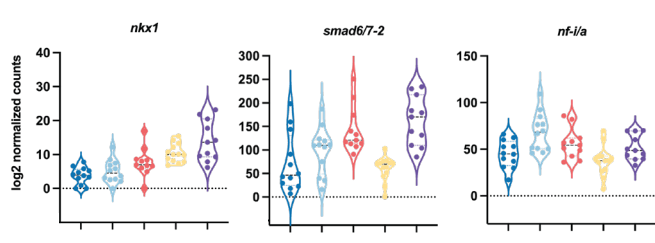



solute transport

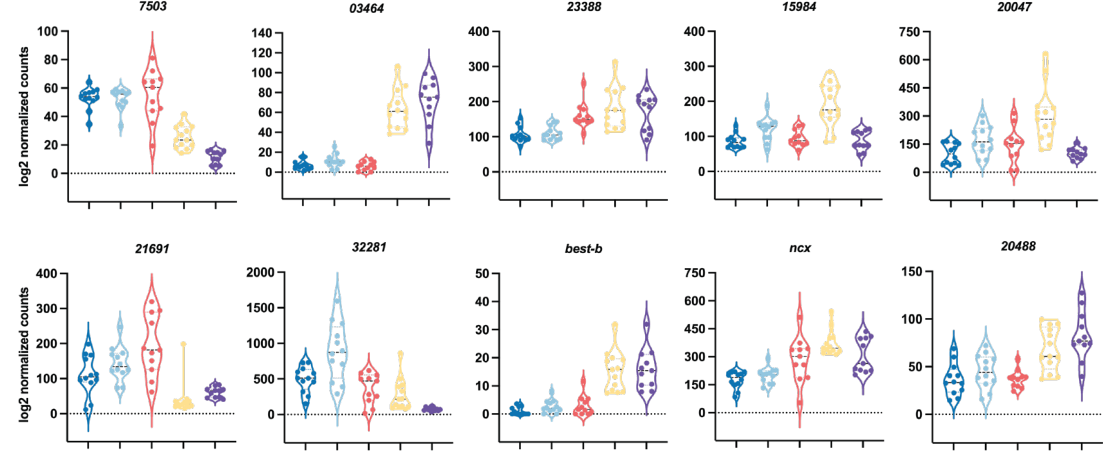

Microvillus

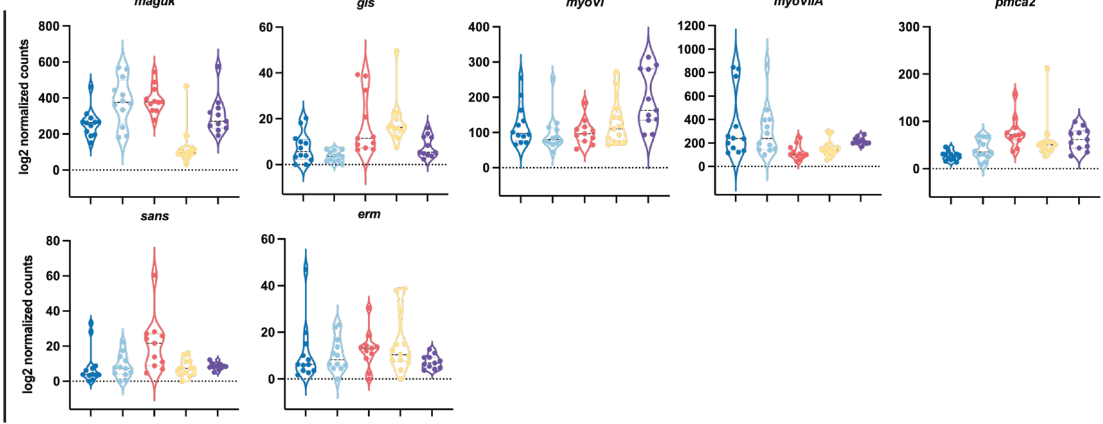

cGMP pathway

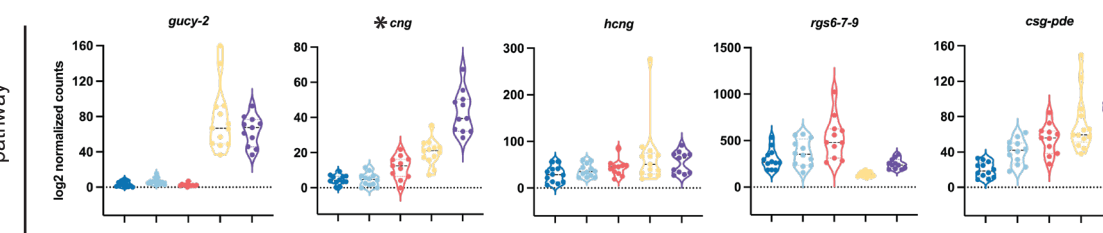

Kinases

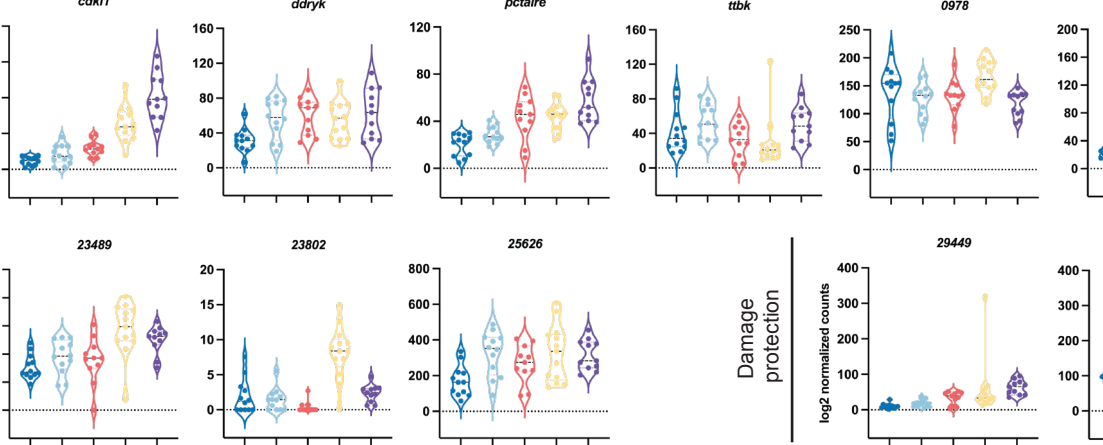

other

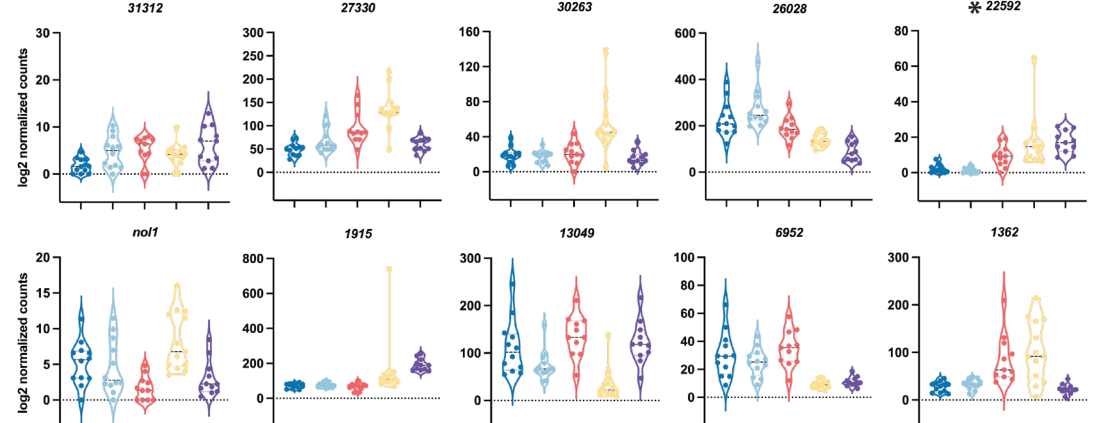

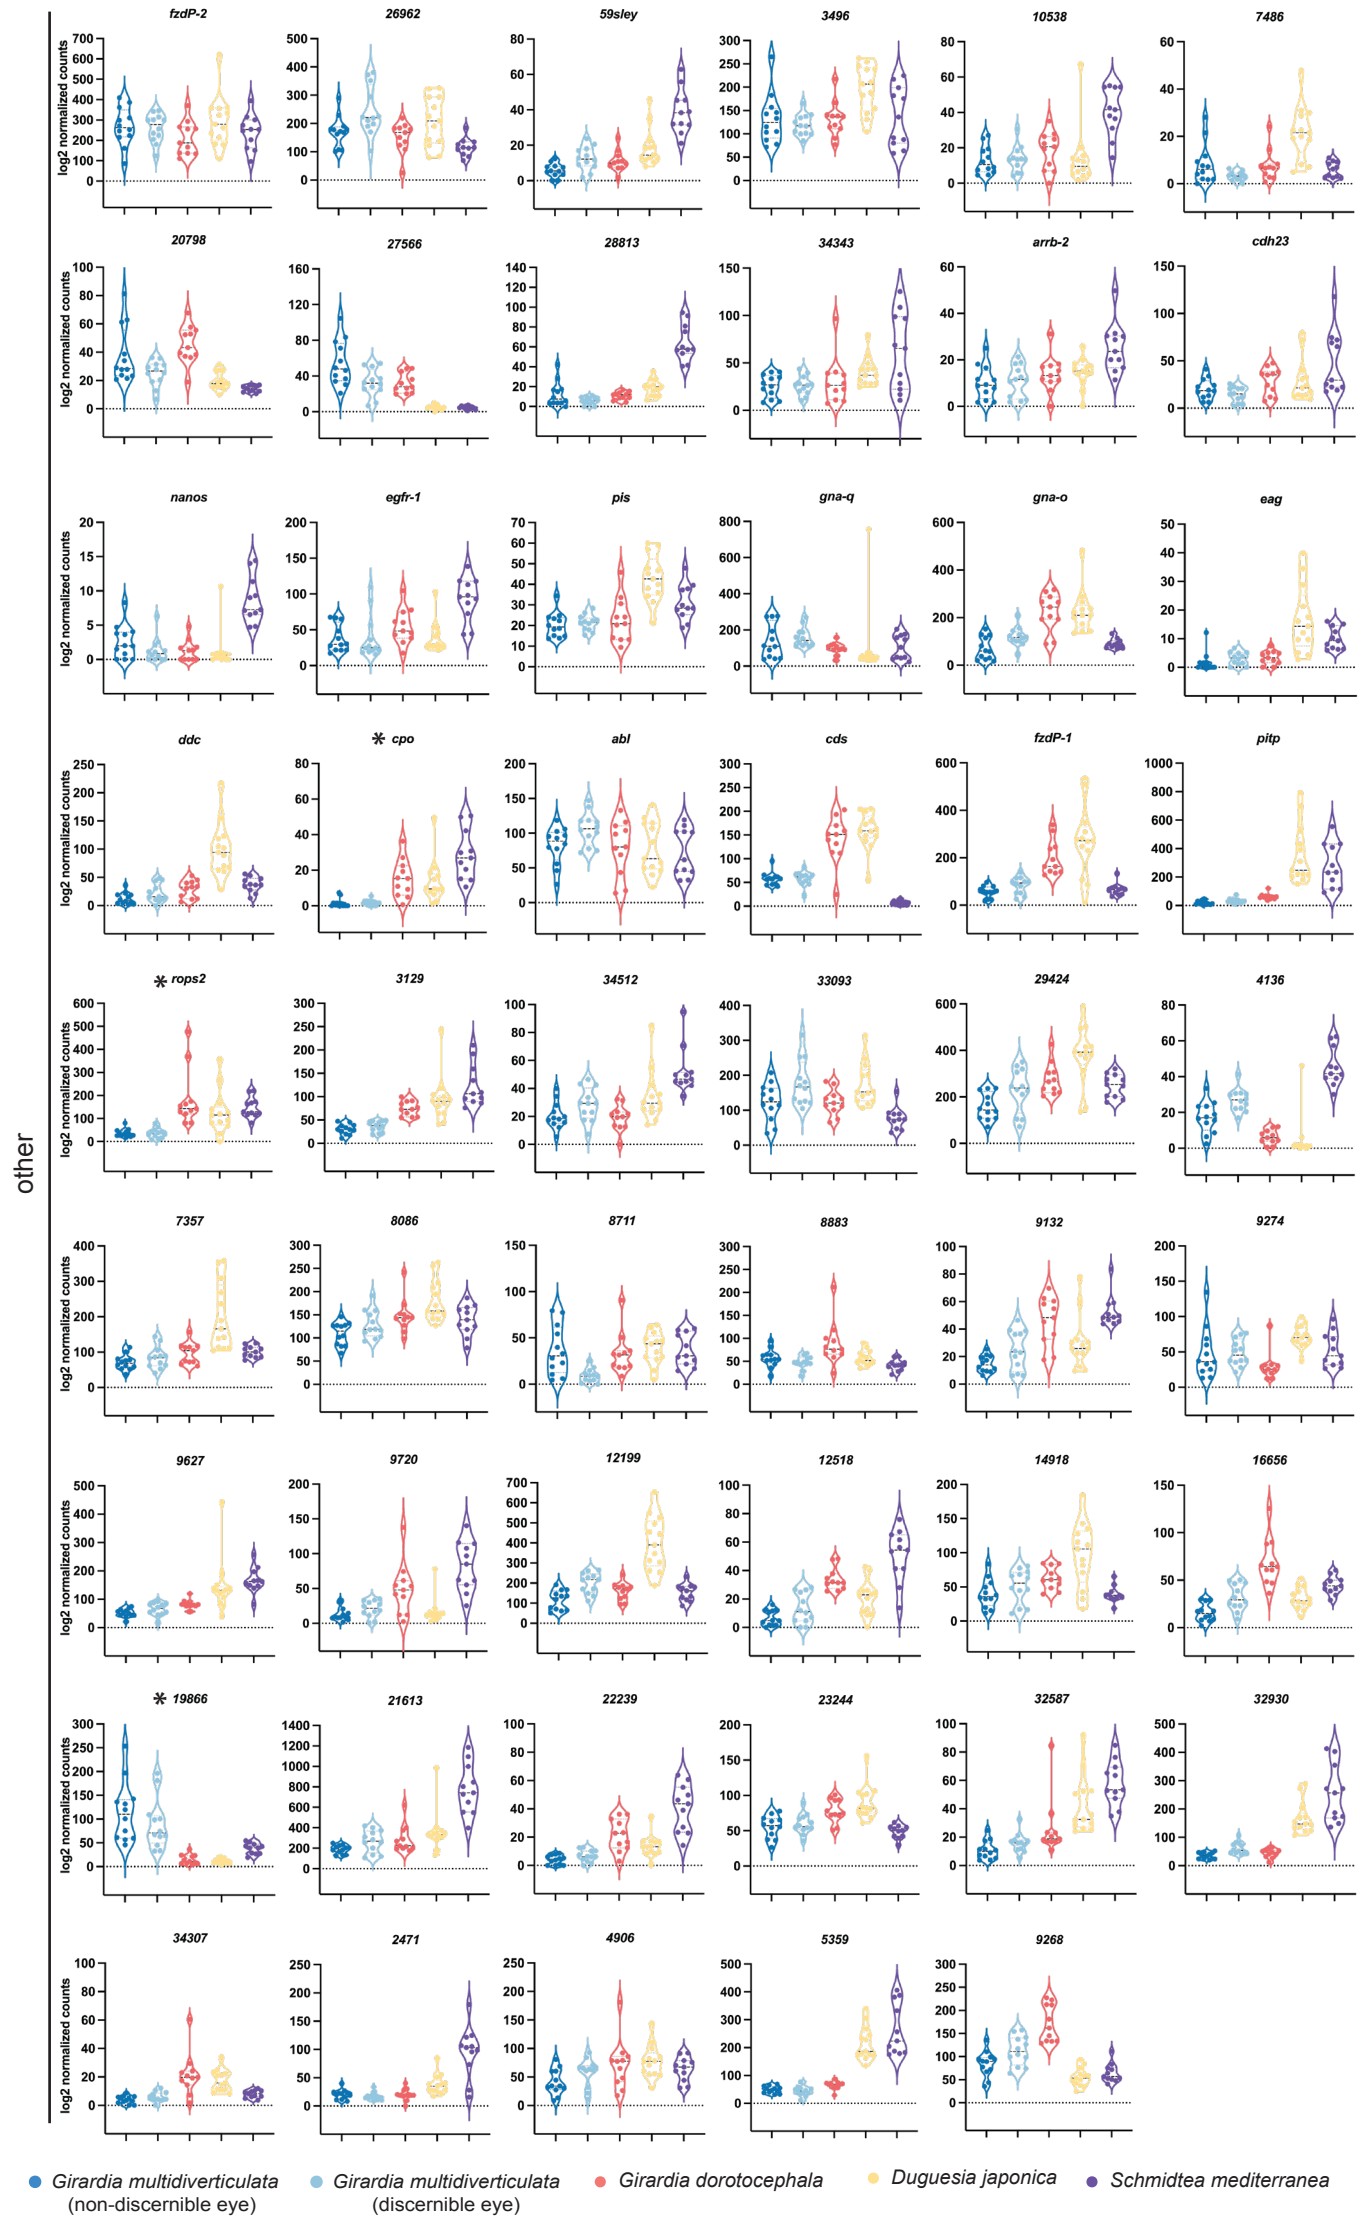

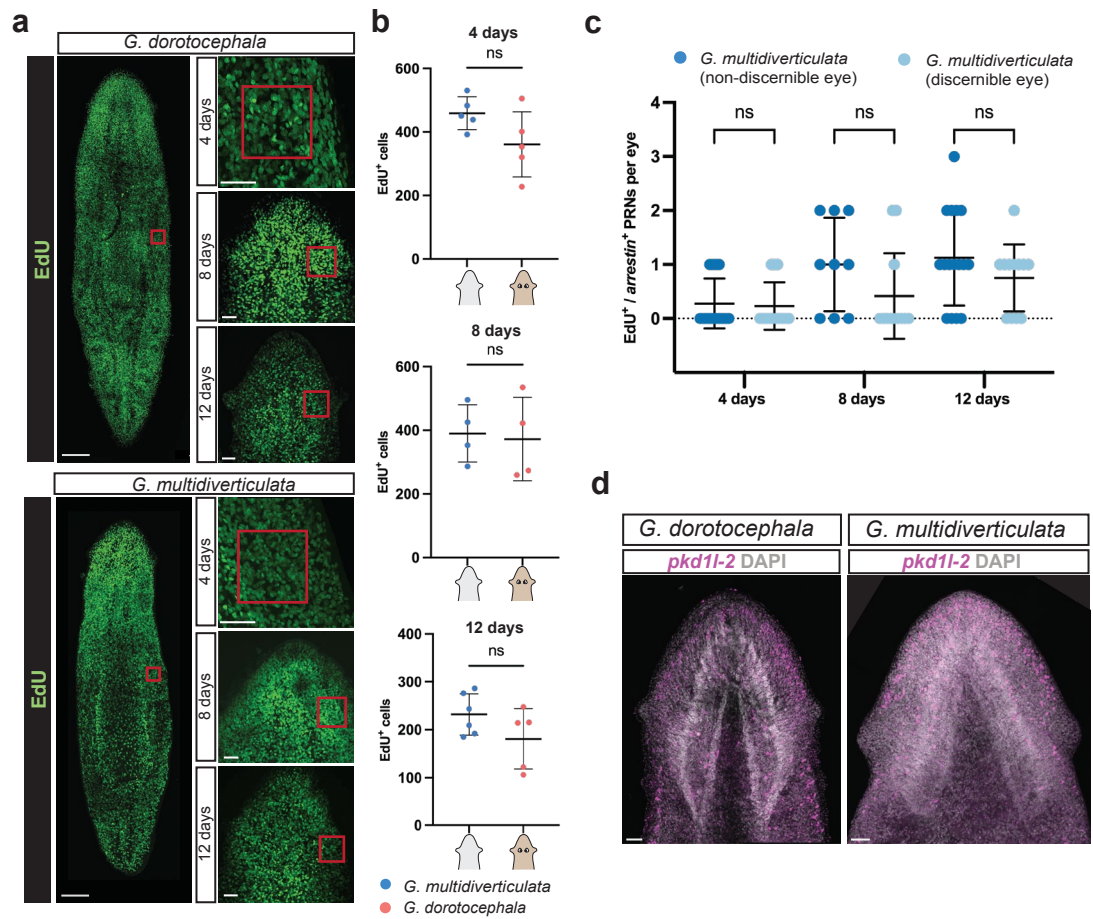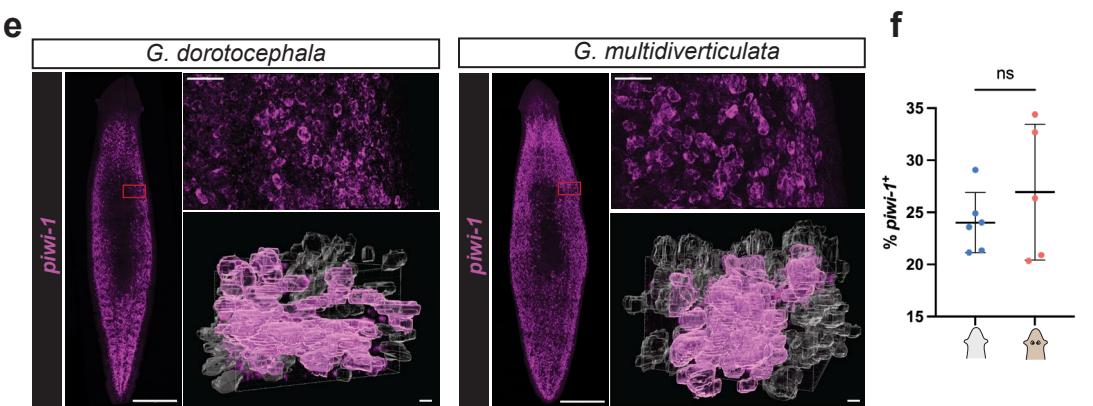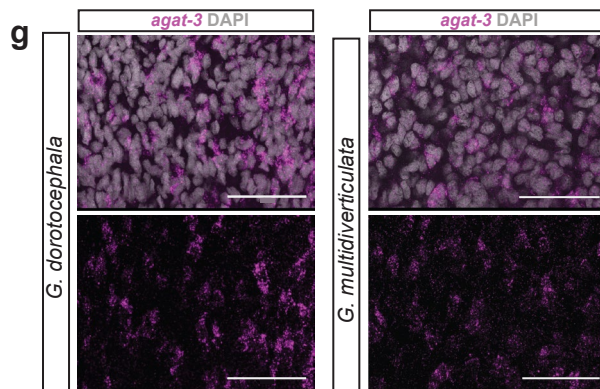

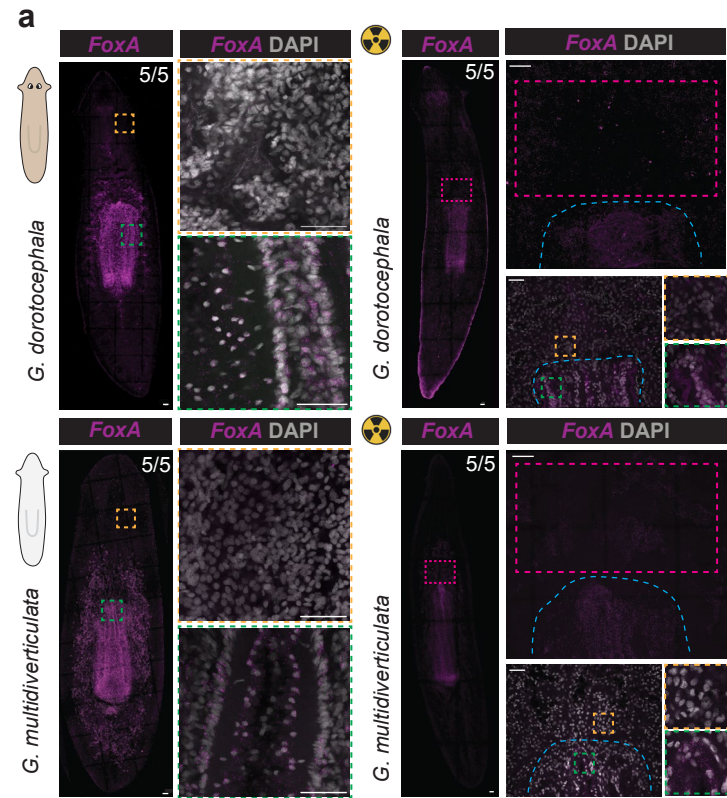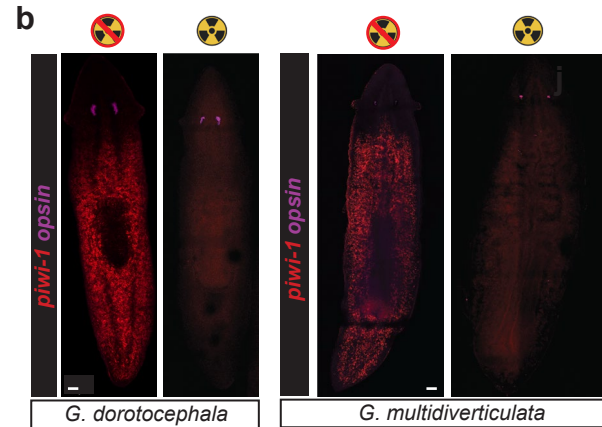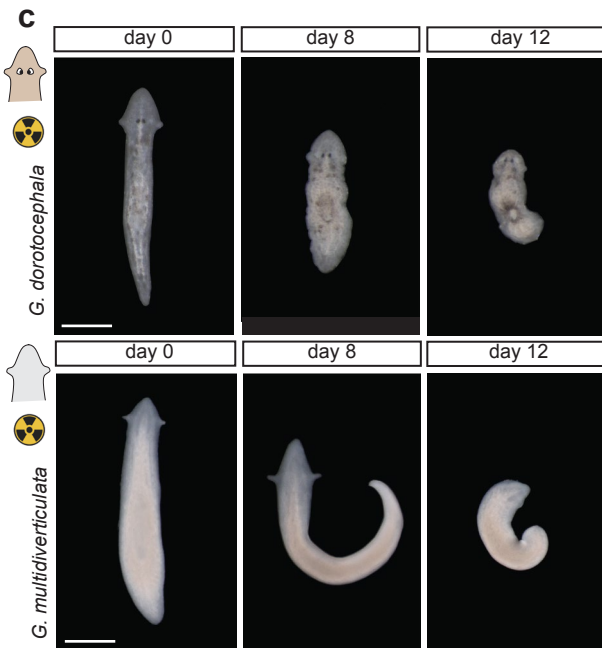

**Table S1. List of DugesIIDae and outgroup species used for phylogenetic analyses with respective accession numbers.**

| Species                          | GenBank accession number |          |          |          |          |
|----------------------------------|--------------------------|----------|----------|----------|----------|
|                                  |                          | 18S      | 28S      | CO1      | EF       |
|                                  | Type I                   | Type II  |          |          |          |
| Family DugesIIDae                |                          |          |          |          |          |
| Ball, 1974                       |                          |          |          |          |          |
| Genus <i>Girardia</i> Ball, 1974 |                          |          |          |          |          |
| <i>Girardia anderlani</i>        |                          | DQ666013 | DQ665972 | DQ666038 |          |
| <i>Girardia dorotocephala</i> 2  |                          |          |          | AF178314 |          |
| <i>Girardia dorotocephala</i> 1  |                          |          |          | KM200929 |          |
| <i>Girardia schubarti</i>        |                          | DQ666015 | DQ665976 | DQ666041 | KJ599691 |
| <i>Girardia tigrina</i> 1        | AF013157                 | AF013156 | DQ665977 | AF178316 | AJ250913 |
| <i>Girardia tigrina</i> 2        |                          |          |          | KM200930 |          |
| <i>Girardia sinensis</i>         |                          |          |          | KP091892 |          |
| <i>Girardia somuncura</i>        |                          |          |          | MW271869 |          |
| <i>Girardia tomasi</i>           |                          |          |          | MW271863 |          |
| Genus <i>Cura</i> Strand, 1942   |                          |          |          |          |          |
| <i>Cura pinguis</i>              | AF033043                 |          | DQ665963 | AF178309 | KJ599684 |
| Genus <i>Schmidtea</i>           |                          |          |          |          |          |
| Ball, 1974                       |                          |          |          |          |          |
| <i>Schmidtea mediterranea</i> 1  | DJARR18SB                | DMU31085 | MG457267 | AF178322 | KJ599709 |
| <i>Schmidtea mediterranea</i> 2  | DMU31084                 |          |          | JF837055 |          |
| <i>Schmidtea polychroa</i>       | AF013152                 | AF013154 | DQ665993 | AF287057 | AJ250914 |
| <i>Schmidtea lugubris</i> 1      |                          |          | MG457269 | MG457275 |          |
| <i>Schmidtea lugubris</i> 2      |                          |          |          | AF290019 |          |
| <i>Schmidtea nova</i>            |                          |          | MG457273 | MG457277 |          |
| Genus <i>Duguesia</i>            |                          |          |          |          |          |
| Girard, 1850                     |                          |          |          |          |          |
| <i>Duguesia aenigma</i>          | KF308698                 |          |          | KC006964 |          |
| <i>Duguesia aethiopica</i>       | KY498822                 |          | KY498806 | KY498845 |          |
| <i>Duguesia afromontana</i>      | KY498823                 |          | KY498807 | KY498846 |          |
| <i>Duguesia arcadia</i>          | KF308694                 |          |          | KF308723 |          |
| <i>Duguesia ariadnae</i>         |                          |          |          | JN376142 |          |
| <i>Duguesia aurea</i>            |                          |          | MK712523 | MK712632 |          |
| <i>Duguesia batuensis</i>        |                          |          | KF907823 | KF907819 |          |
| <i>Duguesia benazzii</i>         |                          |          | MK712509 | FJ646933 |          |
| <i>Duguesia bifida</i>           | KY498829                 |          | KY498813 | KY498851 |          |
| <i>Duguesia corbata</i>          |                          |          | MK712525 | MK712637 |          |
| <i>Duguesia cretica</i>          | KF308697                 |          |          | JN376141 |          |
| <i>Duguesia damoae</i>           |                          |          |          | KC006978 |          |

|                                     |          |            |          |          |          |
|-------------------------------------|----------|------------|----------|----------|----------|
| <i>Duguesia deharvengi</i>          |          |            | KF907824 | KF907820 |          |
| <i>Duguesia effusa</i>              |          |            |          | KC006980 |          |
| <i>Duguesia elegans</i>             | KF308695 |            |          | KC006984 |          |
| <i>Duguesia etrusca</i>             |          |            |          | AF178310 |          |
| <i>Duguesia gibberosa</i>           | KY498842 |            | KY498819 | KY498857 |          |
| <i>Duguesia gonocephala</i>         |          | DQ666002   | DQ665965 | DQ666033 |          |
| <i>Duguesia granosa</i>             | KY498833 |            | KY498816 |          |          |
| <i>Duguesia hepta</i>               |          |            | MK712512 | FJ646943 |          |
| <i>Duguesia ilvana</i>              |          |            |          | FJ646944 |          |
| <i>Duguesia improvisa</i>           | KF308696 |            |          | KC006986 |          |
| <i>Duguesia japonica</i>            | AF013153 | DJA18SRNAA | DQ665966 | DQ666034 | D49924   |
| <i>Duguesia malickyi</i>            |          |            |          | KF308748 |          |
| <i>Duguesia naiadis</i>             |          |            |          | KF308755 |          |
| <i>Duguesia notogaea</i>            | KJ599713 |            | KJ599720 | FJ646945 | KJ599687 |
| <i>Duguesia parasagitta</i>         |          |            |          | KF308738 |          |
| <i>Duguesia ryukyuensis</i>         |          | AF050433   | DQ665968 | AB618488 | KJ599688 |
| <i>Duguesia sagitta</i>             |          |            |          | KC006996 |          |
| <i>Duguesia sicula</i>              | KF308693 |            | DQ665969 | KC536630 | KJ599689 |
| <i>Duguesia sigmoides</i>           |          |            | KY498811 | KY498849 |          |
| <i>Duguesia subtentaculata</i> 1    |          | AF013155   | MK712531 | DQ666036 | KJ599690 |
| <i>Duguesia subtentaculata</i> 2    |          |            |          | FJ646949 |          |
| <i>Duguesia vilafarrei</i>          |          |            | MK712511 | MK712648 |          |
| Genus <i>Neppia</i> Ball, 1974      |          |            |          |          |          |
| <i>Neppia montana</i>               | AF050432 |            |          | AF178319 |          |
| <i>Neppia</i> sp.                   | DQ665999 |            | DQ665982 | DQ666046 | KJ599695 |
| Genus <i>Recurva</i><br>Sluys, 2013 |          |            |          |          |          |
| <i>Recurva postrema</i>             | KF308691 |            | MG457274 | KF308763 |          |
| <i>Recurva</i> sp                   |          |            |          | KF308764 |          |
| <i>Recurva conjuncta</i>            | KF308692 |            |          |          |          |
| Outgroup                            |          |            |          |          |          |
| <i>Dendrocoelum lacteum</i>         | AJ312271 |            | DQ665967 | AF178312 |          |

---

**Table S2. *Girardia multidiverticulata* sequences generated in this study and used in the phylogenetic analyses.**

| Gene | Sequence                                                                                                                                                                                                                                                                                                                                                                                                                                                                                                                                                                                                                                                                                                                                                                                                                                                                                                                                                                                                                                                                                                                                                                                                                                                                                                                                                                                                                                                                                                                                                                                                                                                                                                                                                                                      |
|------|-----------------------------------------------------------------------------------------------------------------------------------------------------------------------------------------------------------------------------------------------------------------------------------------------------------------------------------------------------------------------------------------------------------------------------------------------------------------------------------------------------------------------------------------------------------------------------------------------------------------------------------------------------------------------------------------------------------------------------------------------------------------------------------------------------------------------------------------------------------------------------------------------------------------------------------------------------------------------------------------------------------------------------------------------------------------------------------------------------------------------------------------------------------------------------------------------------------------------------------------------------------------------------------------------------------------------------------------------------------------------------------------------------------------------------------------------------------------------------------------------------------------------------------------------------------------------------------------------------------------------------------------------------------------------------------------------------------------------------------------------------------------------------------------------|
| 18S1 | GCCACAAGATAACTGTGGTAATTCTAGAGCTAATATTTAACAGAATGCCGTGACTC<br>ACGAAGCGGCGGATTTATTAGATCAAAATCAACCTGCTGAAAGGCGGTTTTTTGA<br>TGA CTCTGGATAACTTTCTGATCGTACGACTTAGTGTTGACGACATATCTCTTGAA<br>ATGGCTGACCTATCAACTTTTCGATGGTAAGATCAAAGCTTACCATGGTTGTAACG<br>GGTAACGGGGAATCAGTGTTTCGATTCCGGAGAGGGAGCCTGAGAAACGGCTACC<br>ACATCCACGGAAGGCAGCAGGCGCGCAAATTACCCAATACCGGTTCCGGTGAGGT<br>AGTGACAAAAATAACAATATGGGCCCTAGTGTTTTCATAATTGCAATGAGAACAT<br>TTTTAAATACTTTATCGAGTATCAATTGGAGGGCAAGTCTGGTGCCAGCAGCCGCG<br>GTAATTCAGCTCCAATAGCGTATATTAAGTTGTTGCAGTTAAAAAGCTCGTAGT<br>TGAAATTGAGGAAAAAGATGGTAAATCTACGATTGAGCTATCTTGTCTTCGACGT<br>CGAGTATATCTTTGATGCTCTTTAATGGGTGTTGATGACCGACAAGTTTACTTTGA<br>AAAAATTAGAGTGCTTAAAGCAGGCTTATGCTTGCATATTGTTGCATGGAATAATA<br>AAATAGGACTTCGGTTTTATTTTGTGGTTTTTCGAAACTGAAGTAATGATTAAGA<br>GACTGCCGGGGGCATATGTATGCTGGTGCTAGAGGTGAAATTCTTAGATCATCAG<br>CAGACAAACAAC                                                                                                                                                                                                                                                                                                                                                                                                                                                                                                                                                                                                                                                                                                                                                                                                                                                                                                                  |
| 18S2 | AAACCGCGGATGGCTCATTATAACAGCTATGATTTGAGAGATTTAATCTTTTTGCC<br>ACAAGATAACTGTGGTAATTCTAGAGCTAATATTTAACAGAATGCCGTGACTCACG<br>AAGCGGCGGATTTATTAGATCAAAATCAACCTGCTGAAAGGCGGTTTTTTGATGA<br>CTCTGGATAACTTTACTGATCGTACGACAGTGTTGACGACATATCTCTTCAAATGG<br>CTGACCTATCAACTTTTCGATGGTAAGATCAAAGCTTACCATGGTTGTAACGGGTAA<br>CGGGGAATCAGTGTTTCGATTCCGGAGAGGGAGCCTGAGAAACGGCTACCACATC<br>CACGGAAGGCAGCAGGCGCGCAAATTACCCAATACCGGTTCCGGTGAGGTAGTGA<br>CAAAAAATAACAATATGGGCCCTAGTGTTTTCATAATTGCAATGAGAACATTTTAA<br>ATACTTTATCGAGTATCAATTGGAGGGCAAGTCTGGTGCCAGCAGCCGCGGTAAT<br>TCCAGCTCCAATAGCGTATATTAAGTTGTTGCAGTTAAAAAGCTCGTAGTTGAAA<br>TTGAGGAAAAAGATGGTTTCAAATCTACGATTGATAGCTATTTGTCCTTCGTCGAG<br>TATATCTTTGATCTCTTTAATGGGTGTTGAGGATGACCGACAAGTTTACTTTGAAA<br>AAATTAGAGTGCTTAAAGCAGGCTTATGCTTGCATATTGTTGCATGGAATAATAAA<br>ATAGGACTTCGGTTTTATTTTGTGGTTTTTCGAAACTGAAGTAATGATTAAGAG<br>ACTGCCGGGGGCATATGTATGCTGGTGCTAGAGGTGAAATTCCTTAGATCATCAGC<br>AGACAAACAACCTGCGAAAGCATTTCGCAAGAATGTTTTCAATTAATCAAGAACGAAA<br>GTCAGAGGATCGAAGACGATCAGATACCGTCCTAGTTCTGACCATAAACTATGCC<br>AACTGACAGTTCGCGAAGGTAATTCAAATCTCCTTGCAGAAAGTCACCGGGAAAC<br>CAAGTCTATGGGTTCCGGGGGAAGTATGGTTGCAAAGCTGAACTTAAAGGAATT<br>GACGGAAGGGCACCACCAGGAGTGAGCCTGCGGCTTAATTTGACTCAACACCGG<br>GAAATCTCACCCGGTCCGGGACACTGTGAGGATTGACAGATTGATAGCTCTTTCTT<br>GATTCGGTGTTGGTGGTGCATGGCCGTTTCGTAGTTGGTGGAGCGATTTGTCTG<br>GTTTATTCGTTAACGAACGAGACTCACCTGCTAAATAGTACATTTGTGTTAAATCG<br>CAAATGCTGACTTAGAGGAATAAATAGCGTTTTAGCTAAATGAAATGGAGCAATAAC<br>AGGTCTGTGATGCCCTTAGATGTCCGGGGCCGCACGCGCGCTACAATGGCAGTA<br>CCAGCGAGTTTTTATTCTAGCTAGAAATGGCCGGGTAACCTGCTGAATCACTGTC<br>GTGTCAGGAATAGTGGATTGAAATTATCCCACTTGAACGAGGAATTCCTAGTAAG<br>CGCAAGTCACTAGCTTGCCTGATTACGTCCCTGCCCTTTGTACACACCGCCCGT<br>CGCTACTACCGATTGACCCCTTGATGCGGTCATTGTCTTATTACCGACCCCTAC<br>TTAA |

28S TACTCCAAATTCACCTTGATTGTGATATTGTCCAGAGAGGGTGTAGACCCGTTGGA  
GTATGCGAGACTTTTTATTGATGCTTCCTATGAGTCGGATTGTTTGAGAATGCAGTC  
CAAATGGGTGGTAAACTCCATCTAAGGCTAAATACTTGTGTGAGTCCGATAGCA  
AACAAAGTACCGTGAGGGAAAGTTGAAAAGAACTTTGAAGAGAGAGTTAAATAGTA  
CGTGAAATCGCTTAGAGGTAAACGAGTGGAGCCGAAGCTGATATATGGAATTCAG  
TTGTTTGTATTGTTTTCAAATTCGGAAACAGATTTTTTTTTGAACTGACCGGATTTGA  
CTTTATTTTACAATCAATGCACCTTCCATATATCAAACTGCGACCAATAGTACGA  
TTTTCTGTGCTTGGGGGAAGGTGACCAGTCTTCGGAATCGGTTTTATAGCCCT  
TTGCACGGTTAAATAGTGTATTGGTAATTGCGATTTGCAAATTTTGATATTATCAAT  
GTTGATGATTGAATTCGAGCTTTTTTCGAGATCGGGTTTGAATTGTTGATGTAGTA  
GATTTTCAAAGTGTAATCTAAAGTCTGCAGTATATGTAGGTTACCTACTCGTCCC  
GTCTTGTAACACGGACCAAGGAGTTTTATATGATCGCAAGTCAAAGGGCTATACG  
AAACCCCATGGCGAAATTAATGTAAAGGTTTGCCTTCGGTGAAGTGTGATGTGACC  
TTGTTCCGTAACGAGTGAACATCAACCCGCTGAAGGTGTTCCGATCTGGCG  
GAGTTTGAGCGATCGTGTAAAGACCCGAAAGATGGTGAAGTATGCTTGTGCAGGT  
TGAAGTCAGAGGAACTCTGATGGAAGACCGCCGCGTTCTGACGTGCAAATCG  
ATCGTCGGACATGAGTATAGGGGCGAAAGACTAATCGAACCATCTAGTAGCTGGT  
TCCTTCCGAAGTTTCCCTCAGGATAGCTGGCGTTTTATTTCCGTAGTTGAACCTGGT  
AAAGCGAATGATTAGAAGTATTGGGGGCGAAATGCTCTCAACTTATTCTCAAAT  
TAAATGGGTTTCAAGTGCCTCTTTTTGTTGGAGGTGTACATCGAATACAAATG  
CCTAGTGGGCCATTTTTGGTAAGCAGAAGTGGCGATGTGGGATGAACCAAACATC  
CGTTAAGGTGCCTAACATCACGCTCATGAGAAACCACAAAAGGTGTTGGTTGAT  
AAAGACAGCAGGACGGTGGACATGGAAGTCGTCATCCGCTAAGGAGTGTGTAAC  
AACTCACCTGCCGAATCAACCAGCCCTGAAAATGGATGGCGCTGTAGCGTGGGA  
CCTATACCGGATCGGTATTGTAAGCGAGTAAACAATACCGTGTAG

---

COI TGGTTGTTGTTTCCGCTGGTTAGGGTCAGGGTGGACTTTATATCCGCCTTTGG  
ATCTTGCTATTTTTTCGTTACATCTTGCTGGGGTTAGGTCAATTTGGGAGCTATA  
AATTTTATAACAACAGTTTTGTTGTGTGATCTATAATGATTACTGCGTTTTTGTG  
GTGTTGGCTTTACCGGTGTTGGCTGCGGGGTTGACAATGTTATTGACTGATCGGA  
ATTTAATACGACCTTTTTGATCCTAGAGGTGGTGGAGATCCCATTTTGTTCAG  
CACATATTTTGGTTTTTGGACATCCTGAGGTTTATATTTGATTTACCAGGTTT  
GGAATGATATCTCAGATTGTGATTATTATAGTGGGAAGTGTTTTTCGTTTGGTCA  
TTTGGGGATGGTTTTGCTATGGTGAGGATTGGTTTTTGGTTTTTATTGTGTGG  
CTCATCACATGTATACAGTAGGTATGGATTTGATTCTCGGGCTTACTTTACGGGG  
GTGACTATGATTATAGGAGTGCCGACCGGTATAAAGTTTTTCAAGGTGATTGGCGA  
CATTGTATGGTGGTAGTTGAGATTTGTTGTCTATTTCTTTGTTGTGGGGTTGGGG  
TTTGTATATTTG

---

EF GATTTTCATCAAAAACATGATTACCGGCACCTCCCAAGCCGATTGTGCTGTCTCAT  
TGTTGCTGCTGGTGTGCGTGAATTCGAAGCCGGTATTAGCAAGAACGGTCAAACC  
CGAGAACACGCCTTGCTCGCTTACACTCTCGGTGTCAAACAGATGATTGTCGGTA  
TCAACAAAATCGATTCAGCTGAACCACCATACAGTGAAGCTCGATACAACGAAAT  
CAAGAAGGAAGTTCCGGTTATATCAAGAAAGTTGGTTACAATCCCAGTCCGTT  
GCTTTCGTGCCAATCTCCGGATGGTGCAGTGAACAATGGTGTCCCCAGCACC  
AACATGCCATGGTTAAGGGATGGACCATCAAGAGAAAAGAAATGGAACAACAAGA  
AAGACGAAAGCCTTAATGGTACCCTCTCCTCGAAGCAATTGATGCCATCGACCC  
ACCAGCAAGACCAACCGATAAGCCACTCCGTCTGCCTCTGCAAGACGTCTACAAG  
ATCGGTGGTATTGGAACAGTGCCTGTTGGTGCAGTTGAAACCGGTATTCTTAAAC  
CTGGAATGGTTGTCTTTTCGCTCCTCACGGTTTGACTACTGAAGTTAAATCCGTC  
GAAATG

---



**Table S3a. Results of the differential gene expression analysis in planarian eye-related gene orthologs. DESeq2 Wald test pair-wise comparison between *G. multidiverticulata* non-discernible eyes and *G. multidiverticulata* discernible eyes.**

| gene               | baseMean    | log2FoldChange     | lfcSE       | stat        | pvalue      | padj        |
|--------------------|-------------|--------------------|-------------|-------------|-------------|-------------|
| gir_mul_tyrosinase | 27,8884105  | -2,43897026402606  | 0,433610197 | -5,62479914 | 1,86E-08    | 2,41E-05    |
| gir_mul_cgs-pde    | 23,68026708 | -1,13644421422913  | 0,253685816 | -4,47973101 | 7,47E-06    | 0,001613077 |
| gir_mul_11992      | 21,59106122 | -1,12798393275862  | 0,273204632 | -4,12871452 | 3,65E-05    | 0,004972759 |
| gir_mul_32930      | 38,40833848 | -0,908727438584708 | 0,231485568 | -3,92563323 | 8,65E-05    | 0,006852252 |
| gir_mul_08711      | 17,45938549 | 1,80900535075061   | 0,463286025 | 3,904726783 | 9,43E-05    | 0,007185871 |
| gir_mul_12199      | 124,8429713 | -0,89452233723452  | 0,231372301 | -3,86616001 | 0,000110562 | 0,007954352 |
| gir_mul_59sley     | 7,233482309 | -1,38950044839832  | 0,387521221 | -3,58561124 | 0,00033629  | 0,015306553 |
| gir_mul_25626      | 195,6131572 | -1,02504204068578  | 0,28414477  | -3,60746405 | 0,000309204 | 0,015306553 |
| gir_mul_15984      | 80,87413023 | -0,594431477586589 | 0,167423531 | -3,55046555 | 0,00038455  | 0,016327635 |
| gir_mul_16656      | 18,97676746 | -1,14190339580359  | 0,332459147 | -3,43471794 | 0,000593171 | 0,020826519 |
| gir_mul_5ht-r1     | 32,87165575 | -0,950680366472501 | 0,275888426 | -3,44588709 | 0,000569188 | 0,020826519 |
| gir_mul_32281      | 548,3123203 | -0,919662356118758 | 0,275576665 | -3,33722871 | 0,000846183 | 0,024083666 |
| gir_mul_qdr        | 70,0873597  | 1,13307158238502   | 0,348936036 | 3,247218584 | 0,001165388 | 0,028779622 |
| gir_mul_29449      | 11,02201627 | -1,07280772419692  | 0,340477311 | -3,15089343 | 0,001627719 | 0,037251596 |
| gir_mul_ddryk      | 34,57056555 | -0,890490781408689 | 0,28668838  | -3,10612792 | 0,001895547 | 0,039946388 |
| gir_mul_nf-i-a     | 44,62761259 | -0,658699191849414 | 0,212080605 | -3,10589076 | 0,001897068 | 0,039946388 |
| gir_mul_maguk      | 251,9210221 | -0,638779774105776 | 0,211280886 | -3,02336754 | 0,002499784 | 0,046246011 |
| gir_mul_soxB       | 17,08815028 | -1,02577256205706  | 0,341097816 | -3,00726804 | 0,002636072 | 0,048080471 |
| gir_mul_20047      | 106,8607268 | -0,906938839273828 | 0,309464869 | -2,93066816 | 0,003382339 | 0,05675981  |
| gir_mul_pcdhP-4    | 55,6662357  | -0,809775204053934 | 0,277503087 | -2,91807638 | 0,003521981 | 0,057002562 |
| gir_mul_gna-o      | 74,89381194 | -0,901279942512317 | 0,32018123  | -2,81490561 | 0,004879156 | 0,069322245 |
| gir_mul_26962      | 164,1040443 | -0,60982978466117  | 0,217291386 | -2,80650695 | 0,005008183 | 0,069522855 |
| gir_mul_sk3        | 37,18699555 | -0,52629559273531  | 0,188641593 | -2,78992339 | 0,005272052 | 0,069580797 |
| gir_mul_04136      | 17,26569574 | -0,757163604800711 | 0,275596713 | -2,7473608  | 0,006007701 | 0,075902168 |
| gir_mul_27330      | 46,60445193 | -0,572311651593925 | 0,208215597 | -2,74864929 | 0,005984138 | 0,075902168 |
| gir_mul_09132      | 15,64923556 | -0,885738926666073 | 0,328576137 | -2,69568854 | 0,007024331 | 0,084008706 |
| gir_mul_gpcrP-1    | 14,36269872 | -0,97476381397459  | 0,365980567 | -2,66343052 | 0,007734838 | 0,088113009 |
| gir_mul_21613      | 179,3358946 | -0,59588568819918  | 0,224085166 | -2,65919292 | 0,00783281  | 0,088113009 |
| gir_mul_eya        | 15,82033178 | -0,666578900499514 | 0,25388739  | -2,62549039 | 0,008652425 | 0,092221322 |
| gir_mul_32587      | 10,43379336 | -0,785168661501633 | 0,300660802 | -2,61147664 | 0,009015215 | 0,094150831 |
| gir_mul_meis       | 25,29732707 | -0,598951532828688 | 0,231488242 | -2,58739505 | 0,009670465 | 0,097611075 |
| gir_mul_13405      | 82,12206428 | -0,897689863135459 | 0,349731161 | -2,56679977 | 0,010264186 | 0,099045498 |
| gir_mul_09268      | 76,60574353 | -0,51014249506562  | 0,198905843 | -2,56474363 | 0,010325206 | 0,099045498 |
| gir_mul_pitp       | 20,53902862 | -0,903098403103648 | 0,354495868 | -2,54755693 | 0,010848015 | 0,101798404 |
| gir_mul_29424      | 151,5491617 | -0,644769880298167 | 0,253509009 | -2,54338054 | 0,010978559 | 0,10265151  |
| gir_mul_34512      | 19,19551085 | -0,700545290238785 | 0,277044581 | -2,5286374  | 0,011450626 | 0,105541354 |
| gir_mul_pmca2      | 26,87472063 | -0,72500915884648  | 0,288322026 | -2,51458124 | 0,011917384 | 0,10725483  |
| gir_mul_stim       | 64,43140684 | -0,359388170872851 | 0,143395701 | -2,5062688  | 0,012201282 | 0,108913152 |
| gir_mul_27566      | 32,98629969 | 0,64946421950247   | 0,259330364 | 2,504389419 | 0,012266294 | 0,108913152 |
| gir_mul_pctaire    | 19,35472014 | -0,648066193962536 | 0,261208192 | -2,48103319 | 0,013100217 | 0,113969487 |
| gir_mul_cdkl1      | 10,18760995 | -0,918063991694543 | 0,373249321 | -2,45965348 | 0,013907122 | 0,116567785 |
| gir_mul_fzdP-1     | 54,73531804 | -0,682322677062008 | 0,2876097   | -2,37239105 | 0,017673375 | 0,128940958 |
| gir_mul_33093      | 119,3086231 | -0,60597346800529  | 0,266274582 | -2,27574657 | 0,022861182 | 0,144866431 |
| gir_mul_pde1c      | 27,66840604 | -0,786882423867081 | 0,357174852 | -2,20307342 | 0,027589574 | 0,155344632 |

|                   |             |                    |             |             |             |             |
|-------------------|-------------|--------------------|-------------|-------------|-------------|-------------|
| gir_mul_tph       | 9,485932259 | -0,853799004260926 | 0,38853816  | -2,19746499 | 0,027987254 | 0,156222293 |
| gir_mul_08086     | 93,03838302 | -0,343069569360041 | 0,156120667 | -2,19746415 | 0,027987314 | 0,156222293 |
| gir_mul_12518     | 8,087303117 | -1,12798484917682  | 0,513638842 | -2,1960661  | 0,028087212 | 0,156442753 |
| gir_mul_abl       | 73,86644911 | -0,446584390547316 | 0,204192718 | -2,18707305 | 0,028737192 | 0,157158894 |
| gir_mul_17028     | 16,54521067 | -0,884816603869994 | 0,415340349 | -2,13034107 | 0,033143465 | 0,166682668 |
| gir_mul_03464     | 7,121309453 | -0,774789675623864 | 0,364017127 | -2,12844291 | 0,033300378 | 0,166870508 |
| gir_mul_09627     | 45,32793507 | -0,457288053170925 | 0,217167804 | -2,10568991 | 0,035231297 | 0,172875955 |
| gir_mul_inpp5     | 50,13152177 | -0,376030970415714 | 0,181418478 | -2,07272696 | 0,038197697 | 0,179646946 |
| gir_mul_13049     | 72,43506592 | 0,529832460191849  | 0,262834695 | 2,015839123 | 0,043816801 | 0,194324511 |
| gir_mul_04906     | 39,00551614 | -0,612817940729681 | 0,310865195 | -1,97133018 | 0,048686121 | 0,206716483 |
| gir_mul_28813     | 6,791216408 | 0,961453103171823  | 0,490567297 | 1,959880142 | 0,050009801 | 0,209588001 |
| gir_mul_ddc       | 13,73949574 | -0,873205795342197 | 0,455564606 | -1,91675513 | 0,055269048 | 0,221589525 |
| gir_mul_07357     | 60,81897964 | -0,409235877204884 | 0,215336316 | -1,90044988 | 0,057374106 | 0,225261604 |
| gir_mul_03129     | 25,8173754  | -0,405904152783197 | 0,222284659 | -1,82605563 | 0,067841883 | 0,245648382 |
| gir_mul_20798     | 23,94782466 | 0,456041091719155  | 0,252384017 | 1,806933331 | 0,070772675 | 0,249050581 |
| gir_mul_09720     | 13,39080554 | -0,729138769339342 | 0,432789746 | -1,68474132 | 0,09203849  | 0,289999622 |
| gir_mul_26028     | 195,8553885 | -0,312393053727884 | 0,185807549 | -1,68127213 | 0,092710069 | 0,291406649 |
| gir_mul_rgs6-7-9  | 261,891821  | -0,393486471074783 | 0,235638641 | -1,66987243 | 0,094944605 | 0,294146564 |
| gir_mul_hcng      | 26,45552489 | -0,510612923133118 | 0,306344347 | -1,66679401 | 0,095555371 | 0,295288171 |
| gir_mul_trpc-2    | 41,50356115 | -0,32500226148492  | 0,197880563 | -1,6424163  | 0,100503759 | 0,304006849 |
| gir_mul_20488     | 32,04060628 | -0,433820528563097 | 0,266058336 | -1,63054665 | 0,102986014 | 0,308760446 |
| gir_mul_nhe-rf    | 31,18206398 | 0,30966326217189   | 0,194196755 | 1,594585152 | 0,110805035 | 0,3220932   |
| gir_mul_21691     | 98,88415036 | -0,471602768216249 | 0,296446849 | -1,59085101 | 0,111643111 | 0,323440332 |
| gir_mul_ip3k      | 31,05446574 | -0,405699207318025 | 0,255481304 | -1,58798003 | 0,112290856 | 0,324590754 |
| gir_mul_ttbk      | 37,83289369 | -0,444465700194048 | 0,281407342 | -1,57943889 | 0,114235422 | 0,326567046 |
| gir_mul_otxA      | 11,97420571 | -0,383496740672531 | 0,242768641 | -1,57967989 | 0,114180193 | 0,326567046 |
| gir_mul_ncx       | 147,0268248 | -0,267801129334036 | 0,171405821 | -1,5623806  | 0,118198354 | 0,332475912 |
| gir_mul_23489     | 26,86207329 | -0,32057911863755  | 0,206844747 | -1,54985381 | 0,121176609 | 0,33632316  |
| gir_mul_17151     | 19,04892488 | -0,488073189427267 | 0,318118235 | -1,5342509  | 0,124967939 | 0,340897792 |
| gir_mul_01362     | 23,64621775 | -0,353660620759446 | 0,234776061 | -1,50637428 | 0,131971119 | 0,349494067 |
| gir_mul_14918     | 35,73721404 | -0,468201103364477 | 0,320679621 | -1,46002762 | 0,144282484 | 0,372945741 |
| gir_mul_smad6-7-2 | 66,57565412 | -0,577429095776467 | 0,399416659 | -1,44568105 | 0,148266681 | 0,379941044 |
| gir_mul_best-a    | 4,649296593 | 0,697068918905947  | 0,486569801 | 1,432618542 | 0,15196688  | 0,385498745 |
| gir_mul_arrestin  | 91,59578752 | -0,538647453996702 | 0,385403879 | -1,39761814 | 0,162227767 | 0,401308422 |
| gir_mul_cdh23     | 13,5312933  | 0,428169787535769  | 0,336297417 | 1,273187857 | 0,202951388 | 0,455017221 |
| gir_mul_gpcrP-2   | 12,03023699 | -0,446002889631654 | 0,355191455 | -1,25566897 | 0,209236013 | 0,46173299  |
| gir_mul_23388     | 83,84837155 | -0,161924752522717 | 0,13169036  | -1,22958698 | 0,218851807 | 0,473143722 |
| gir_mul_ovo       | 8,205386898 | -0,47138508332608  | 0,438597273 | -1,07475607 | 0,282483951 | 0,546675553 |
| gir_mul_myoVI     | 85,22818206 | 0,277945252648985  | 0,259626052 | 1,070559948 | 0,284367341 | 0,547999563 |
| gir_mul_02471     | 14,57968834 | 0,251109912269821  | 0,243052204 | 1,033152171 | 0,301532691 | 0,569635063 |
| gir_mul_01915     | 57,87718834 | -0,149213758856177 | 0,145560448 | -1,02509824 | 0,305316835 | 0,573612711 |
| gir_mul_ip3r      | 22,83690887 | -0,328454628198542 | 0,327579429 | -1,00267171 | 0,316019282 | 0,583548121 |
| gir_mul_plcb      | 23,56483348 | -0,462069700161015 | 0,479570952 | -0,96350644 | 0,335293435 | 0,600560163 |
| gir_mul_gna-q     | 116,2821222 | -0,302396323115961 | 0,317719955 | -0,95177001 | 0,341213637 | 0,603224209 |
| gir_mul_08883     | 40,4561405  | 0,177769764057194  | 0,196896905 | 0,902857075 | 0,366601755 | 0,62768096  |
| gir_mul_19866     | 77,47210417 | 0,262469741101235  | 0,291166812 | 0,901441134 | 0,367353819 | 0,62768096  |
| gir_mul_arrb-2    | 8,11472171  | -0,360771173487754 | 0,405786159 | -0,88906722 | 0,373966954 | 0,63274417  |
| gir_mul_10513     | 78,53833905 | -0,126687178999873 | 0,143000141 | -0,88592345 | 0,375658776 | 0,633435046 |

|                     |             |                    |             |             |             |             |
|---------------------|-------------|--------------------|-------------|-------------|-------------|-------------|
| gir_mul_23244       | 44,99460518 | -0,162986139789453 | 0,191025826 | -0,85321521 | 0,39353997  | 0,646866231 |
| gir_mul_robo-c      | 146,8565539 | -0,180964460772134 | 0,242020515 | -0,74772364 | 0,454626869 | 0,694202571 |
| gir_mul_six-1-2     | 21,49392696 | -0,30234753036477  | 0,410449107 | -0,73662611 | 0,46134975  | 0,697953186 |
| gir_mul_pis         | 16,12499518 | -0,137357646916587 | 0,194153647 | -0,7074688  | 0,479275198 | 0,712175997 |
| gir_mul_dagk        | 41,76232737 | -0,141333774408906 | 0,217539039 | -0,64969384 | 0,515890002 | 0,74148452  |
| gir_mul_06952       | 21,41095333 | 0,173427972702226  | 0,269075984 | 0,644531594 | 0,519230777 | 0,745045824 |
| gir_mul_cds         | 45,24490868 | -0,105279921615773 | 0,175772126 | -0,59895686 | 0,54920165  | 0,762579397 |
| gir_mul_dlx         | 13,28359767 | -0,16223307897883  | 0,285508867 | -0,56822431 | 0,569882666 | 0,772750112 |
| gir_mul_09274       | 37,41386113 | -0,175313242620376 | 0,309827241 | -0,56584193 | 0,571501243 | 0,772944239 |
| gir_mul_foxq2       | 8,587303355 | -0,206616903356341 | 0,393405153 | -0,52520131 | 0,599443252 | 0,79374132  |
| gir_mul_05359       | 35,93096623 | 0,0976115077709606 | 0,213315455 | 0,457592291 | 0,647245383 | 0,813663741 |
| gir_mul_myoVIIA     | 258,7886965 | 0,163408107332692  | 0,378611707 | 0,431598136 | 0,666033513 | 0,824126251 |
| gir_mul_crf-r       | 8,986567158 | 0,160553909730284  | 0,3761407   | 0,426845352 | 0,669491971 | 0,824326197 |
| gir_mul_10538       | 10,51662923 | -0,138973336424189 | 0,346944205 | -0,40056394 | 0,688741202 | 0,835913643 |
| gir_mul_04256       | 18,22760366 | 0,0933948122169766 | 0,236473793 | 0,394947834 | 0,692881387 | 0,839657846 |
| gir_mul_03496       | 98,30938264 | 0,0792156993923352 | 0,203180303 | 0,389878834 | 0,696626146 | 0,841594008 |
| gir_mul_07503       | 40,92741355 | -0,050100088704783 | 0,138584828 | -0,36151207 | 0,717716681 | 0,848589473 |
| gir_mul_34343       | 20,43704029 | -0,090787291872129 | 0,279023773 | -0,32537476 | 0,744897459 | 0,863600904 |
| gir_mul_atp13       | 57,07261499 | 0,078650312494884  | 0,275057998 | 0,285940831 | 0,77492344  | 0,878744182 |
| gir_mul_sans        | 6,505450923 | -0,144662613223153 | 0,513016418 | -0,28198437 | 0,777955492 | 0,879871059 |
| gir_mul_unc5-2      | 74,39671998 | 0,0505821881074856 | 0,194037781 | 0,260682162 | 0,794337624 | 0,890187404 |
| gir_mul_fzdP-2      | 207,7698584 | -0,034541974703329 | 0,221434555 | -0,1559918  | 0,876039485 | 0,944212346 |
| gir_mul_egfr-1      | 29,77638411 | -0,043727849828038 | 0,331125011 | -0,13205843 | 0,894938074 | 0,951124174 |
| gir_mul_erm         | 7,974600663 | -0,055275244302512 | 0,442541673 | -0,12490404 | 0,900599517 | 0,953229567 |
| gir_mul_00978       | 103,5848499 | 0,0253730176214565 | 0,209991157 | 0,120828981 | 0,903826494 | 0,954305186 |
| gir_mul_30263       | 14,31510384 | 0,0174450658220385 | 0,273973855 | 0,063674199 | 0,949229649 | 0,974051027 |
| gir_mul_unc5-1      | 92,916547   | 0,0163211482711712 | 0,292301992 | 0,055836596 | 0,955471981 | 0,978905234 |
| gir_mul_rops2       | 28,73048798 | -0,01547953836226  | 0,293136001 | -0,05280668 | 0,957885941 | 0,980602603 |
| gir_mul_31312       | 2,571412387 | -1,435385591616    | 0,528313321 | -2,71692107 | 0,006589232 | NA          |
| gir_mul_5ht-r2      | 1,405958211 | -1,27657344110444  | 0,668090725 | -1,91077857 | 0,056033043 | NA          |
| gir_mul_best-b      | 1,445315053 | -1,19678897820336  | 0,676575263 | -1,7688926  | 0,076911799 | NA          |
| gir_mul_eag         | 1,930413554 | -1,04226729558121  | 0,65913814  | -1,58125775 | 0,113819115 | NA          |
| gir_mul_gucy-2      | 4,027105906 | -0,94980495516137  | 0,439771033 | -2,15977152 | 0,030790361 | NA          |
| gir_mul_ninag       | 2,165369495 | -0,761074062692243 | 0,624846924 | -1,21801682 | 0,223217581 | NA          |
| gir_mul_22239       | 4,240498188 | -0,750133754021415 | 0,468805344 | -1,60009642 | 0,109577194 | NA          |
| gir_mul_cpo         | 1,275200168 | -0,693785113117173 | 0,684051037 | -1,01423004 | 0,310472996 | NA          |
| gir_mul_34307       | 3,913674276 | -0,610588995316409 | 0,402589919 | -1,51665247 | 0,12935445  | NA          |
| gir_mul_nkx1        | 3,441672541 | -0,592653831593183 | 0,413126    | -1,43455951 | 0,15141266  | NA          |
| gir_mul_transferrin | 4,298065723 | -0,304721139479848 | 0,530351448 | -0,57456455 | 0,565585835 | NA          |
| gir_mul_cng         | 3,612864606 | -0,205563521055484 | 0,462917671 | -0,44406065 | 0,656998736 | NA          |
| gir_mul_22592       | 1,331574395 | 0,0021833209218344 | 0,679538047 | 0,003212949 | 0,997436442 | NA          |
| gir_mul_nol1        | 3,818123629 | 0,0941450661372704 | 0,431146064 | 0,218360027 | 0,827148608 | NA          |
| gir_mul_klf         | 3,500491823 | 0,102773517547348  | 0,576616365 | 0,17823552  | 0,858538016 | NA          |
| gir_mul_sp6-9       | 1,432347217 | 0,142228936779413  | 0,609583775 | 0,233321395 | 0,815511846 | NA          |
| gir_mul_23802       | 1,30360065  | 0,632828475720041  | 0,695720318 | 0,909601832 | 0,363032532 | NA          |
| gir_mul_gls         | 4,156605037 | 0,70006688562508   | 0,481018548 | 1,455384389 | 0,145562876 | NA          |
| gir_mul_nanos       | 1,431419879 | 0,975819584326934  | 0,641751561 | 1,520556619 | 0,12837114  | NA          |
| gir_mul_07486       | 4,304660279 | 1,08805032034256   | 0,47384192  | 2,296230608 | 0,021662699 | NA          |

---

**Table S3b. Results of the differential gene expression analysis in planarian eye-related gene orthologs. DESeq2 Wald test pair-wise comparison between *G. dorocephala* and *G. multidiverticulata* morphotypes.**

| <i>G. dorocephala</i> and <i>G. multidiverticulata</i> non-discernible eyes: |             |                   |             |             |             |             |
|------------------------------------------------------------------------------|-------------|-------------------|-------------|-------------|-------------|-------------|
| gene                                                                         | baseMean    | log2FoldChanlfcSE | stat        | pvalue      | padj        |             |
| gir_mul_tyrosinase                                                           | 112,4774342 | -4,77501228       | 0,444914936 | -10,7324162 | 7,17E-27    | 3,49E-25    |
| gir_mul_tph                                                                  | 55,73708718 | -4,10615923       | 0,418724091 | -9,80636013 | 1,06E-22    | 3,45E-21    |
| gir_mul_19866                                                                | 47,46845961 | 3,049772023       | 0,336368226 | 9,066766074 | 1,23E-19    | 2,99E-18    |
| gir_mul_rops2                                                                | 75,84765669 | -2,26119462       | 0,305977784 | -7,39006144 | 1,47E-13    | 1,89E-12    |
| gir_mul_arrestin                                                             | 296,069815  | -2,93283929       | 0,418957516 | -7,00032624 | 2,55E-12    | 2,86E-11    |
| gir_mul_16656                                                                | 28,89609572 | -2,10114472       | 0,304751319 | -6,89462061 | 5,40E-12    | 5,68E-11    |
| gir_mul_fzdP-1                                                               | 88,67898437 | -1,81274992       | 0,267743983 | -6,77045998 | 1,28E-11    | 1,31E-10    |
| gir_mul_12518                                                                | 13,95022965 | -2,25340272       | 0,346343686 | -6,50626186 | 7,70E-11    | 7,00E-10    |
| gir_mul_03129                                                                | 36,41258749 | -1,27639384       | 0,212499151 | -6,00658327 | 1,89E-09    | 1,45E-08    |
| gir_mul_cpo                                                                  | 5,759809143 | -3,51947088       | 0,61487692  | -5,7238624  | 1,04E-08    | 7,18E-08    |
| gir_mul_inpp5                                                                | 71,11817057 | -1,34854068       | 0,236118284 | -5,71129289 | 1,12E-08    | 7,68E-08    |
| gir_mul_pmca2                                                                | 36,01419709 | -1,40374062       | 0,24651573  | -5,69432472 | 1,24E-08    | 8,41E-08    |
| gir_mul_09132                                                                | 21,04159714 | -1,64112498       | 0,288622021 | -5,68606989 | 1,30E-08    | 8,75E-08    |
| gir_mul_cgs-pde                                                              | 25,76063288 | -1,39188723       | 0,251493266 | -5,53449105 | 3,12E-08    | 2,00E-07    |
| gir_mul_01362                                                                | 39,80717903 | -1,62496883       | 0,302864576 | -5,36533142 | 8,08E-08    | 4,84E-07    |
| gir_mul_22592                                                                | 3,918965352 | -2,6979258        | 0,531071245 | -5,08015793 | 3,77E-07    | 2,04E-06    |
| gir_mul_cds                                                                  | 69,24219844 | -1,23781764       | 0,244671108 | -5,0591083  | 4,21E-07    | 2,27E-06    |
| gir_mul_gpcrP-1                                                              | 16,78622457 | -1,40551746       | 0,277820942 | -5,05907673 | 4,21E-07    | 2,27E-06    |
| gir_mul_pitp                                                                 | 28,39927046 | -1,61969713       | 0,321646213 | -5,03564806 | 4,76E-07    | 2,54E-06    |
| gir_mul_09268                                                                | 89,54986664 | -1,02666716       | 0,204441418 | -5,02181587 | 5,12E-07    | 2,72E-06    |
| gir_mul_34307                                                                | 8,832647734 | -2,10584538       | 0,423331153 | -4,97446352 | 6,54E-07    | 3,40E-06    |
| gir_mul_gna-o                                                                | 102,221816  | -1,67824366       | 0,342233462 | -4,9037977  | 9,40E-07    | 4,81E-06    |
| gir_mul_22239                                                                | 8,798759418 | -2,22201498       | 0,455412805 | -4,87912276 | 1,07E-06    | 5,41E-06    |
| gir_mul_27330                                                                | 50,69559742 | -0,97207709       | 0,210695327 | -4,61366232 | 3,96E-06    | 1,80E-05    |
| gir_mul_cdkl1                                                                | 11,60318247 | -1,3606098        | 0,30154007  | -4,51220229 | 6,42E-06    | 2,81E-05    |
| gir_mul_myoVIIA                                                              | 175,2273354 | 1,568769905       | 0,365048041 | 4,297434112 | 1,73E-05    | 6,93E-05    |
| gir_mul_29449                                                                | 15,11552662 | -1,80517202       | 0,420173    | -4,29625897 | 1,74E-05    | 6,95E-05    |
| gir_mul_pcdhP-4                                                              | 56,85397821 | -1,01740762       | 0,241998117 | -4,20419642 | 2,62E-05    | 0,000101434 |
| gir_mul_crf-r                                                                | 5,866485834 | 1,834471869       | 0,439322427 | 4,175684542 | 2,97E-05    | 0,000113866 |
| gir_mul_09720                                                                | 21,25980949 | -1,83789605       | 0,448947148 | -4,09379157 | 4,24E-05    | 0,000158303 |
| gir_mul_23388                                                                | 93,51298959 | -0,62353273       | 0,152765162 | -4,08164218 | 4,47E-05    | 0,000165604 |
| gir_mul_04136                                                                | 8,477124906 | 1,67495379        | 0,421565729 | 3,973173521 | 7,09E-05    | 0,000252001 |
| gir_mul_unc5-1                                                               | 66,26127249 | 1,03454664        | 0,261412364 | 3,957527574 | 7,57E-05    | 0,000268154 |
| gir_mul_cng                                                                  | 5,60588631  | -1,45346441       | 0,373828564 | -3,88805069 | 0,000101053 | 0,000347015 |
| gir_mul_10513                                                                | 93,02695134 | -0,72534816       | 0,188735285 | -3,84320375 | 0,000121439 | 0,000410139 |
| gir_mul_29424                                                                | 151,7063523 | -0,79000381       | 0,206291739 | -3,82954651 | 0,00012838  | 0,000431209 |
| gir_mul_eya                                                                  | 19,21034361 | -1,19548877       | 0,315849524 | -3,78499468 | 0,000153712 | 0,000508116 |
| gir_mul_32587                                                                | 12,85795801 | -1,16016964       | 0,330296963 | -3,51250472 | 0,000443904 | 0,001326958 |
| gir_mul_transferrin                                                          | 6,654633361 | -1,6498378        | 0,473687462 | -3,482967   | 0,000495889 | 0,001470899 |
| gir_mul_trpc-2                                                               | 54,35378032 | -1,06764204       | 0,310467137 | -3,43882463 | 0,000584246 | 0,001703356 |
| gir_mul_09627                                                                | 46,21515826 | -0,63699679       | 0,189151109 | -3,36766086 | 0,000758088 | 0,002158933 |

|                   |             |             |             |             |             |             |
|-------------------|-------------|-------------|-------------|-------------|-------------|-------------|
| gir_mul_rgs6-7-9  | 292,2476383 | -0,80823147 | 0,241768991 | -3,34299063 | 0,000828807 | 0,002334346 |
| gir_mul_maguk     | 229,7121132 | -0,56704362 | 0,174718349 | -3,24547262 | 0,001172558 | 0,003188088 |
| gir_mul_pctaire   | 22,26216855 | -1,08851195 | 0,335359115 | -3,24580993 | 0,001171117 | 0,003188088 |
| gir_mul_ddryk     | 31,89022341 | -0,87082139 | 0,27445015  | -3,17296745 | 0,001508894 | 0,003979644 |
| gir_mul_17028     | 15,82143467 | -0,97742113 | 0,315578006 | -3,09724096 | 0,00195331  | 0,004997219 |
| gir_mul_27566     | 30,85049016 | 0,792165245 | 0,256555495 | 3,087695493 | 0,00201715  | 0,005143399 |
| gir_mul_nhe-rf    | 24,97394906 | 1,040283917 | 0,342054996 | 3,041276784 | 0,002355772 | 0,005899037 |
| gir_mul_ninag     | 3,605479088 | -1,63452104 | 0,555798941 | -2,9408495  | 0,003273135 | 0,008006793 |
| gir_mul_ddc       | 14,61973258 | -1,16269153 | 0,417946753 | -2,78191305 | 0,005403952 | 0,012520854 |
| gir_mul_sk3       | 36,72241151 | -0,63479558 | 0,228947538 | -2,77266831 | 0,005559876 | 0,012843355 |
| gir_mul_ip3k      | 33,00379082 | -0,74719659 | 0,269798062 | -2,76946612 | 0,005614824 | 0,012960534 |
| gir_mul_31312     | 2,409245564 | -1,5287914  | 0,55709902  | -2,74420049 | 0,006065848 | 0,013924306 |
| gir_mul_nkx1      | 3,978612652 | -1,02145992 | 0,377912436 | -2,70290105 | 0,006873721 | 0,015470911 |
| gir_mul_nol1      | 2,500405485 | 1,381935589 | 0,513360594 | 2,691939359 | 0,007103786 | 0,015895498 |
| gir_mul_gls       | 8,680143502 | -1,30073873 | 0,488139207 | -2,66468809 | 0,007705976 | 0,017118196 |
| gir_mul_21613     | 167,7348833 | -0,58309002 | 0,218971188 | -2,66286186 | 0,007747921 | 0,017186502 |
| gir_mul_ncx       | 162,7553333 | -0,68155644 | 0,25995663  | -2,62180826 | 0,008746462 | 0,019179742 |
| gir_mul_08883     | 50,96423876 | -0,65882795 | 0,251486755 | -2,61973221 | 0,008799884 | 0,019283114 |
| gir_mul_smad6-7-2 | 74,57085652 | -0,95963383 | 0,36654892  | -2,6180239  | 0,008844061 | 0,01933851  |
| gir_mul_08086     | 90,64254366 | -0,4345095  | 0,174327212 | -2,49249384 | 0,012684953 | 0,026764815 |
| gir_mul_sans      | 10,24629848 | -1,16963531 | 0,474220349 | -2,46643847 | 0,013646417 | 0,028596929 |
| gir_mul_07357     | 59,32847489 | -0,50809747 | 0,20839927  | -2,43809623 | 0,014764843 | 0,030772619 |
| gir_mul_14918     | 36,06848451 | -0,64183902 | 0,265703563 | -2,41562068 | 0,015708416 | 0,032518434 |
| gir_mul_21691     | 107,2556377 | -0,79620823 | 0,338940753 | -2,34910739 | 0,018818478 | 0,038033396 |
| gir_mul_sp6-9     | 2,379398191 | -1,28173676 | 0,560266995 | -2,28772491 | 0,022153546 | 0,044048825 |
| gir_mul_23802     | 0,848331127 | 1,992387628 | 0,879420429 | 2,265568962 | 0,023477787 | 0,046262392 |
| gir_mul_04906     | 39,80685891 | -0,73806216 | 0,33388913  | -2,21050072 | 0,027070431 | 0,052235212 |
| gir_mul_23244     | 47,13006435 | -0,41880704 | 0,19262505  | -2,17420858 | 0,029689474 | 0,056789212 |
| gir_mul_25626     | 154,3533135 | -0,63263382 | 0,296538815 | -2,13339295 | 0,032892505 | 0,061912931 |
| gir_mul_stim      | 63,87786679 | -0,43668372 | 0,206664111 | -2,11301187 | 0,034599752 | 0,064729578 |
| gir_mul_59sley    | 5,847828317 | -0,84789087 | 0,405404219 | -2,09147026 | 0,03648593  | 0,067762737 |
| gir_mul_09274     | 27,48428648 | 0,705837869 | 0,347638344 | 2,030379795 | 0,042317949 | 0,077055814 |
| gir_mul_05359     | 40,1249141  | -0,35393208 | 0,181548576 | -1,94951726 | 0,051233684 | 0,091022806 |
| gir_mul_12199     | 97,29323274 | -0,44749203 | 0,244076393 | -1,8334097  | 0,066741667 | 0,114403639 |
| gir_mul_dlx       | 17,27390243 | -0,69970913 | 0,38449344  | -1,81982073 | 0,06878631  | 0,117318873 |
| gir_mul_hcng      | 25,76689858 | -0,58496418 | 0,322920309 | -1,81148154 | 0,070066345 | 0,119039114 |
| gir_mul_eag       | 1,822558431 | -1,20848854 | 0,67698135  | -1,78511349 | 0,07424291  | 0,125509766 |
| gir_mul_best-b    | 1,396772808 | -1,31815163 | 0,758801387 | -1,73714974 | 0,082360744 | 0,137119025 |
| gir_mul_best-a    | 7,021974088 | -0,79462837 | 0,471429815 | -1,68557088 | 0,091878483 | 0,150596339 |
| gir_mul_32930     | 28,10133763 | -0,3836301  | 0,228418214 | -1,67950746 | 0,093053185 | 0,152277867 |
| gir_mul_arrb-2    | 8,402424873 | -0,61443536 | 0,366817061 | -1,67504576 | 0,093925255 | 0,153507715 |
| gir_mul_pde1c     | 16,42284824 | 0,672869343 | 0,403605797 | 1,667144891 | 0,095485598 | 0,15574364  |
| gir_mul_ovo       | 9,457189859 | -0,71635275 | 0,439764405 | -1,62894665 | 0,103324314 | 0,164926611 |
| gir_mul_egfr-1    | 32,76987369 | -0,48554495 | 0,301477144 | -1,61055309 | 0,107277165 | 0,170202013 |
| gir_mul_unc5-2    | 65,12510537 | 0,296748079 | 0,1892772   | 1,567796222 | 0,116928697 | 0,182868619 |
| gir_mul_10538     | 11,04953621 | -0,5337867  | 0,353413358 | -1,510375   | 0,130947764 | 0,200703762 |

|                 |             |             |             |             |             |             |
|-----------------|-------------|-------------|-------------|-------------|-------------|-------------|
| gir_mul_fzdP-2  | 172,4968065 | 0,376267617 | 0,249567344 | 1,507679694 | 0,131636525 | 0,201457693 |
| gir_mul_04256   | 15,6494416  | 0,406184766 | 0,269723608 | 1,505929605 | 0,132085246 | 0,20194308  |
| gir_mul_26028   | 150,602507  | 0,294498527 | 0,196295187 | 1,500283996 | 0,133540853 | 0,203762634 |
| gir_mul_gna-q   | 84,89992158 | 0,516469923 | 0,34724345  | 1,487342446 | 0,136924389 | 0,20778936  |
| gir_mul_foxq2   | 11,73103848 | -0,6956152  | 0,507189393 | -1,37150975 | 0,170216107 | 0,250077903 |
| gir_mul_5ht-r2  | 1,286203966 | -0,96057271 | 0,755623209 | -1,2712324  | 0,203645982 | 0,288639504 |
| gir_mul_nf-i-a  | 35,78104056 | -0,27239194 | 0,216720343 | -1,25688219 | 0,208796298 | 0,294579336 |
| gir_mul_20047   | 85,99766472 | -0,52725769 | 0,420584856 | -1,25362976 | 0,209976609 | 0,296108493 |
| gir_mul_myoVI   | 79,82160858 | 0,312117997 | 0,251606881 | 1,240498654 | 0,214791012 | 0,301926926 |
| gir_mul_klf     | 2,69150342  | 0,790847316 | 0,643141033 | 1,229663909 | 0,218822987 | 0,306611853 |
| gir_mul_32281   | 311,4203365 | 0,45369669  | 0,372061498 | 1,21941317  | 0,222687414 | 0,310891478 |
| gir_mul_cdh23   | 17,17546513 | -0,39399612 | 0,340054594 | -1,15862608 | 0,246608633 | 0,337383468 |
| gir_mul_ttbk    | 27,11111601 | 0,439805869 | 0,380661458 | 1,155372734 | 0,247937823 | 0,338899873 |
| gir_mul_ip3r    | 22,13438077 | -0,37283325 | 0,32299921  | -1,15428532 | 0,248383213 | 0,339357571 |
| gir_mul_17151   | 16,94794736 | -0,3197976  | 0,280966992 | -1,13820347 | 0,255035532 | 0,34674893  |
| gir_mul_robo-c  | 144,8392496 | -0,29991478 | 0,278653958 | -1,0762983  | 0,281793867 | 0,375154888 |
| gir_mul_23489   | 23,58577238 | -0,24040812 | 0,224325676 | -1,0716924  | 0,283858215 | 0,377575702 |
| gir_mul_meis    | 20,89553793 | -0,26148129 | 0,247969423 | -1,05449005 | 0,291658615 | 0,386611377 |
| gir_mul_01915   | 49,44343609 | 0,200661862 | 0,199437573 | 1,006138711 | 0,31434885  | 0,412062753 |
| gir_mul_20798   | 29,1236906  | -0,25832028 | 0,257959284 | -1,00139943 | 0,316633738 | 0,414173658 |
| gir_mul_dagk    | 40,24801906 | -0,25543659 | 0,257993215 | -0,99009035 | 0,322129961 | 0,419931626 |
| gir_mul_plcb    | 22,46367852 | -0,51417638 | 0,5360603   | -0,95917638 | 0,337469896 | 0,437329076 |
| gir_mul_13049   | 88,35952214 | -0,25261494 | 0,265850383 | -0,95021468 | 0,34200318  | 0,440046003 |
| gir_mul_gucy-2  | 2,173058761 | 0,483229672 | 0,54076853  | 0,893597992 | 0,371537021 | 0,471915041 |
| gir_mul_nanos   | 1,360322452 | 0,556215306 | 0,659457136 | 0,843444215 | 0,398980052 | 0,499024055 |
| gir_mul_26962   | 115,6332412 | 0,211859692 | 0,254186029 | 0,833482837 | 0,404572473 | 0,505098615 |
| gir_mul_erm     | 8,145789183 | -0,35000344 | 0,439326193 | -0,7966824  | 0,42563551  | 0,526047108 |
| gir_mul_six-1-2 | 21,10080952 | -0,32684911 | 0,412853945 | -0,79168217 | 0,428546024 | 0,529218139 |
| gir_mul_06952   | 23,02583081 | -0,20675874 | 0,26423372  | -0,7824843  | 0,433930007 | 0,534995956 |
| gir_mul_30263   | 14,23968468 | -0,24151422 | 0,31272608  | -0,7722868  | 0,439944584 | 0,540468137 |
| gir_mul_11992   | 12,54031559 | 0,212589211 | 0,288683967 | 0,736408098 | 0,461482378 | 0,560423615 |
| gir_mul_13405   | 59,35599484 | -0,25451697 | 0,358223332 | -0,71049802 | 0,477395358 | 0,575649548 |
| gir_mul_otxA    | 10,31612337 | -0,18342649 | 0,283015507 | -0,64811463 | 0,516910809 | 0,613182451 |
| gir_mul_07486   | 5,636368861 | 0,307798468 | 0,500609544 | 0,614847383 | 0,538655514 | 0,633590968 |
| gir_mul_15984   | 64,41650021 | -0,10356127 | 0,171358453 | -0,60435459 | 0,545607922 | 0,640786656 |
| gir_mul_28813   | 8,150949687 | 0,237798534 | 0,447705259 | 0,531149745 | 0,595315015 | 0,689146718 |
| gir_mul_abl     | 57,41396196 | 0,123434692 | 0,314527093 | 0,392445342 | 0,69472919  | 0,776134866 |
| gir_mul_03496   | 94,15257145 | 0,072970092 | 0,216515183 | 0,337020669 | 0,736101319 | 0,810847166 |
| gir_mul_07503   | 38,23781998 | -0,06062619 | 0,188426713 | -0,32174944 | 0,747642521 | 0,819151513 |
| gir_mul_00978   | 96,65075716 | 0,062041749 | 0,218931048 | 0,283384882 | 0,776881816 | 0,843361802 |
| gir_mul_08711   | 24,93273421 | 0,118254533 | 0,419224269 | 0,282079406 | 0,777882624 | 0,843851469 |
| gir_mul_pis     | 15,13068354 | -0,07202397 | 0,268925775 | -0,26782102 | 0,788837094 | 0,853193217 |
| gir_mul_02471   | 14,51601671 | -0,07224272 | 0,273332859 | -0,26430308 | 0,791546384 | 0,85474759  |
| gir_mul_20488   | 26,19068047 | -0,06135747 | 0,241225509 | -0,25435731 | 0,799219529 | 0,861215849 |
| gir_mul_03464   | 4,683731774 | 0,100451126 | 0,410196138 | 0,244885597 | 0,806545014 | 0,86728308  |
| gir_mul_qdr     | 95,5297225  | -0,05743894 | 0,373077128 | -0,15395996 | 0,877641308 | 0,920204514 |

|                 |             |             |             |             |             |             |
|-----------------|-------------|-------------|-------------|-------------|-------------|-------------|
| gir_mul_34343   | 20,18041912 | -0,04563417 | 0,337402908 | -0,13525126 | 0,89241322  | 0,926906678 |
| gir_mul_gpcrP-2 | 9,65409569  | 0,048357998 | 0,387074448 | 0,124932034 | 0,900577357 | 0,931841081 |
| gir_mul_33093   | 88,16811051 | 0,03171192  | 0,264506163 | 0,119891045 | 0,904569458 | 0,9345332   |
| gir_mul_34512   | 14,01586457 | -0,0251769  | 0,282608414 | -0,08908759 | 0,929012303 | 0,951804464 |
| gir_mul_atp13   | 54,95066837 | 0,017251713 | 0,284744629 | 0,060586613 | 0,951688435 | 0,96520763  |
| gir_mul_5ht-r1  | 21,51852102 | -0,01058288 | 0,273818436 | -0,03864926 | 0,969170028 | 0,977769302 |
| gir_mul_soxB    | 10,67290879 | -0,00045288 | 0,387967178 | -0,00116733 | 0,999068608 | 0,999394144 |

***G. dorotocephala* and *G. multidiverticulata* discernible eyes:**

| gene               | baseMean    | log2FoldChanlfcSE | stat        | pvalue      | padj        |             |
|--------------------|-------------|-------------------|-------------|-------------|-------------|-------------|
| gir_mul_04136      | 13,94292517 | 2,44819314        | 0,295289297 | 8,29082926  | 1,12E-16    | 1,74E-15    |
| gir_mul_19866      | 43,70758208 | 2,741251787       | 0,338847811 | 8,089920301 | 5,97E-16    | 8,49E-15    |
| gir_mul_tph        | 64,88945921 | -3,28402951       | 0,430947796 | -7,62048105 | 2,53E-14    | 3,09E-13    |
| gir_mul_rops2      | 84,84196167 | -2,2694715        | 0,327876306 | -6,92173073 | 4,46E-12    | 4,32E-11    |
| gir_mul_qdr        | 75,48092825 | -1,28669327       | 0,187893803 | -6,84798142 | 7,49E-12    | 7,06E-11    |
| gir_mul_arrestin   | 347,3920523 | -2,42936185       | 0,391295855 | -6,20850393 | 5,35E-10    | 4,00E-09    |
| gir_mul_cpo        | 6,459748121 | -2,84042786       | 0,525226872 | -5,40800177 | 6,37E-08    | 3,67E-07    |
| gir_mul_22592      | 4,071730928 | -2,67376832       | 0,49518109  | -5,3995768  | 6,68E-08    | 3,82E-07    |
| gir_mul_11992      | 22,25320576 | 1,317833445       | 0,24590633  | 5,359087109 | 8,36E-08    | 4,71E-07    |
| gir_mul_03129      | 43,4589205  | -0,89386095       | 0,179011439 | -4,99331749 | 5,94E-07    | 3,02E-06    |
| gir_mul_cds        | 78,12145641 | -1,16965008       | 0,236429074 | -4,94714995 | 7,53E-07    | 3,71E-06    |
| gir_mul_gls        | 8,200998632 | -2,0506831        | 0,420737928 | -4,8740153  | 1,09E-06    | 5,24E-06    |
| gir_mul_fzdP-1     | 111,2944466 | -1,17183331       | 0,245166842 | -4,77973818 | 1,76E-06    | 8,08E-06    |
| gir_mul_inpp5      | 85,70811436 | -1,00744472       | 0,212304732 | -4,74527679 | 2,08E-06    | 9,45E-06    |
| gir_mul_01362      | 46,8130239  | -1,33070456       | 0,282242692 | -4,71475292 | 2,42E-06    | 1,09E-05    |
| gir_mul_tyrosinase | 146,1517042 | -2,36491153       | 0,535045195 | -4,42002199 | 9,87E-06    | 3,94E-05    |
| gir_mul_16656      | 39,46340309 | -0,99246896       | 0,235582169 | -4,21283566 | 2,52E-05    | 9,40E-05    |
| gir_mul_myoVIIA    | 179,0433927 | 1,394873929       | 0,3310985   | 4,21286696  | 2,52E-05    | 9,40E-05    |
| gir_mul_08711      | 16,44572074 | -1,71670774       | 0,425974828 | -4,0300685  | 5,58E-05    | 0,000195099 |
| gir_mul_34307      | 10,68155276 | -1,54499097       | 0,389250945 | -3,96913866 | 7,21E-05    | 0,000248144 |
| gir_mul_22239      | 10,99417548 | -1,48066718       | 0,374664596 | -3,9519805  | 7,75E-05    | 0,000263678 |
| gir_mul_crf-r      | 5,601762814 | 1,607511553       | 0,408681108 | 3,933412926 | 8,37E-05    | 0,000282099 |
| gir_mul_pde1c      | 24,98385572 | 1,401249343       | 0,359046245 | 3,902698781 | 9,51E-05    | 0,000316606 |
| gir_mul_5ht-r1     | 34,99749451 | 0,914585666       | 0,23552542  | 3,883171787 | 0,000103103 | 0,000340206 |
| gir_mul_10513      | 106,1414707 | -0,63658808       | 0,166328012 | -3,82730529 | 0,000129554 | 0,000417617 |
| gir_mul_08883      | 53,54966802 | -0,87454842       | 0,232494201 | -3,76159243 | 0,000168835 | 0,000534152 |
| gir_mul_23388      | 107,806214  | -0,50851102       | 0,13597079  | -3,73985485 | 0,000184127 | 0,000578953 |
| gir_mul_best-a     | 6,703478115 | -1,53574241       | 0,419287406 | -3,66274394 | 0,000249528 | 0,000762736 |
| gir_mul_20798      | 27,69943725 | -0,75711572       | 0,206900803 | -3,65931746 | 0,000252888 | 0,000770706 |
| gir_mul_unc5-1     | 72,5804541  | 0,996733668       | 0,277608494 | 3,590429293 | 0,000330134 | 0,000984632 |
| gir_mul_gna-o      | 135,9811237 | -0,83056836       | 0,232687078 | -3,56946491 | 0,000357711 | 0,001061728 |
| gir_mul_32281      | 521,235676  | 1,335089276       | 0,376250377 | 3,548406477 | 0,00038757  | 0,001139343 |
| gir_mul_13049      | 83,29200698 | -0,810951         | 0,229891934 | -3,52753133 | 0,000419454 | 0,001223707 |
| gir_mul_soxB       | 17,84435378 | 0,996014732       | 0,283507589 | 3,513185435 | 0,000442768 | 0,001283193 |
| gir_mul_gna-q      | 105,8508397 | 0,78870635        | 0,225181005 | 3,502543878 | 0,000460838 | 0,001328043 |
| gir_mul_26028      | 189,0279401 | 0,57828034        | 0,165623847 | 3,491528252 | 0,000480266 | 0,001377569 |

|                     |             |             |             |             |             |             |
|---------------------|-------------|-------------|-------------|-------------|-------------|-------------|
| gir_mul_12518       | 18,49773521 | -1,1445228  | 0,338160757 | -3,3845524  | 0,000712944 | 0,001962513 |
| gir_mul_gucy-2      | 3,830481087 | 1,395950779 | 0,414757345 | 3,365704784 | 0,000763484 | 0,002079275 |
| gir_mul_09274       | 32,08120777 | 0,826197266 | 0,262462927 | 3,147862736 | 0,001644689 | 0,004179061 |
| gir_mul_cng         | 6,385193201 | -1,28117912 | 0,416352613 | -3,07714923 | 0,002089906 | 0,005173403 |
| gir_mul_26962       | 162,6310049 | 0,777078112 | 0,254524515 | 3,053058017 | 0,002265221 | 0,005571887 |
| gir_mul_09268       | 113,4225435 | -0,55402282 | 0,181673147 | -3,04955814 | 0,002291783 | 0,005627783 |
| gir_mul_pitp        | 38,36682044 | -0,75135372 | 0,249851404 | -3,0072023  | 0,002636642 | 0,00637275  |
| gir_mul_sp6-9       | 2,664642909 | -1,46945403 | 0,511405975 | -2,87336109 | 0,004061296 | 0,009379481 |
| gir_mul_33093       | 123,1140175 | 0,603744043 | 0,210785823 | 2,864253558 | 0,004179933 | 0,009611342 |
| gir_mul_pmca2       | 46,71942812 | -0,73711506 | 0,272529674 | -2,70471486 | 0,006836304 | 0,014947421 |
| gir_mul_transferrin | 7,955793156 | -1,33869324 | 0,497831607 | -2,6890483  | 0,007165605 | 0,015578725 |
| gir_mul_trpc-2      | 64,67908628 | -0,79249688 | 0,295737182 | -2,67973366 | 0,007368076 | 0,015996275 |
| gir_mul_sans        | 11,62966071 | -1,07588918 | 0,421163316 | -2,55456527 | 0,010632049 | 0,022198319 |
| gir_mul_ttbk        | 35,6946071  | 0,853054169 | 0,333951159 | 2,554427932 | 0,010636245 | 0,022198319 |
| gir_mul_09720       | 27,02989638 | -1,14656705 | 0,453931653 | -2,52585834 | 0,011541601 | 0,023859891 |
| gir_mul_09132       | 28,00386653 | -0,80520275 | 0,319835845 | -2,51755005 | 0,011817418 | 0,024364502 |
| gir_mul_cdh23       | 16,8344357  | -0,8532283  | 0,340725905 | -2,50414861 | 0,012274647 | 0,025155246 |
| gir_mul_15984       | 87,90191324 | 0,44313132  | 0,17982254  | 2,464270171 | 0,013729258 | 0,027820766 |
| gir_mul_34512       | 19,33807988 | 0,627002477 | 0,259654049 | 2,414761021 | 0,015745537 | 0,03130763  |
| gir_mul_05359       | 43,12811811 | -0,50185639 | 0,212263474 | -2,36430874 | 0,018063752 | 0,035435405 |
| gir_mul_32930       | 43,1312129  | 0,484894045 | 0,20725195  | 2,33963562  | 0,019302562 | 0,03760144  |
| gir_mul_28813       | 6,538550564 | -0,76072487 | 0,327029453 | -2,32616624 | 0,020009684 | 0,038757723 |
| gir_mul_nol1        | 2,620450149 | 1,276244143 | 0,554252305 | 2,30264111  | 0,021299044 | 0,04102236  |
| gir_mul_03464       | 6,991374084 | 0,837374052 | 0,374841711 | 2,233940423 | 0,025486993 | 0,047770618 |
| gir_mul_12199       | 146,8228022 | 0,413216457 | 0,189034362 | 2,185933031 | 0,028820505 | 0,053047688 |
| gir_mul_29449       | 20,39063465 | -0,8172286  | 0,384195606 | -2,12711595 | 0,033410451 | 0,059986502 |
| gir_mul_eya         | 24,95820126 | -0,57548608 | 0,272510592 | -2,11179345 | 0,034704169 | 0,061947244 |
| gir_mul_nhe-rf      | 23,1505251  | 0,663582905 | 0,314383967 | 2,11074029  | 0,034794641 | 0,06207267  |
| gir_mul_27330       | 65,77791426 | -0,43619416 | 0,213574555 | -2,04235079 | 0,041116747 | 0,071685952 |
| gir_mul_nf-i-a      | 50,56314138 | 0,364442614 | 0,182555768 | 1,996335796 | 0,045897384 | 0,078901379 |
| gir_mul_abl         | 75,27433906 | 0,54468831  | 0,277506709 | 1,962793306 | 0,049670196 | 0,084395377 |
| gir_mul_06952       | 23,74730839 | -0,42492967 | 0,223192685 | -1,90386915 | 0,056927228 | 0,095302694 |
| gir_mul_ip3k        | 41,69144345 | -0,37815545 | 0,199422008 | -1,89625735 | 0,057926023 | 0,096763862 |
| gir_mul_07486       | 4,274838013 | -0,81224735 | 0,432932796 | -1,87615112 | 0,060634532 | 0,101068521 |
| gir_mul_ncx         | 194,2079203 | -0,44432935 | 0,237708239 | -1,86922148 | 0,061592006 | 0,102331338 |
| gir_mul_rgs6-7-9    | 359,140319  | -0,45966039 | 0,24666453  | -1,8635042  | 0,062391362 | 0,103379862 |
| gir_mul_13405       | 91,69373659 | 0,610913757 | 0,328882923 | 1,857541737 | 0,063234119 | 0,104607008 |
| gir_mul_pctaire     | 28,59500337 | -0,49380349 | 0,269798799 | -1,83026572 | 0,067210215 | 0,110175976 |
| gir_mul_fzdP-2      | 192,0955765 | 0,377108118 | 0,21405648  | 1,761722502 | 0,078116194 | 0,126235112 |
| gir_mul_23244       | 55,01605668 | -0,2811479  | 0,15966615  | -1,76084851 | 0,078264047 | 0,126407546 |
| gir_mul_01915       | 57,51048304 | 0,316283302 | 0,183886457 | 1,719992366 | 0,085433829 | 0,136622969 |
| gir_mul_gpcrP-1     | 23,45039359 | -0,47716477 | 0,286824656 | -1,66361142 | 0,096190109 | 0,151847901 |
| gir_mul_meis        | 28,52151007 | 0,307762321 | 0,188721013 | 1,630779291 | 0,102936899 | 0,160927304 |
| gir_mul_ninag       | 4,579849474 | -0,95195791 | 0,599208437 | -1,58869244 | 0,112129847 | 0,173358273 |
| gir_mul_32587       | 16,66543464 | -0,422109   | 0,265834628 | -1,5878631  | 0,112317298 | 0,173560735 |
| gir_mul_smad6-7-2   | 96,02888218 | -0,44632003 | 0,283880486 | -1,57221102 | 0,115901621 | 0,177669551 |



|                 |             |             |             |             |             |             |
|-----------------|-------------|-------------|-------------|-------------|-------------|-------------|
| gir_mul_23802   | 0,768482045 | 1,39689047  | 0,894579275 | 1,561505514 | 0,118404524 | 0,181325373 |
| gir_mul_dlx     | 19,80913071 | -0,54657309 | 0,353726342 | -1,54518627 | 0,122301215 | 0,186641496 |
| gir_mul_20488   | 33,44378261 | 0,340127151 | 0,22636669  | 1,502549475 | 0,132955261 | 0,201010082 |
| gir_mul_cdkl1   | 15,97460759 | -0,47831962 | 0,32217211  | -1,48467109 | 0,137630972 | 0,207154506 |
| gir_mul_02471   | 15,02472104 | -0,36560383 | 0,247996974 | -1,47422698 | 0,140420488 | 0,210322642 |
| gir_mul_59sley  | 9,540440078 | 0,502195656 | 0,34762007  | 1,444668185 | 0,148551111 | 0,220565013 |
| gir_mul_gpcrP-2 | 11,77838605 | 0,455446964 | 0,316423891 | 1,439357065 | 0,150049382 | 0,222252508 |
| gir_mul_21691   | 134,9420468 | -0,36103345 | 0,251729117 | -1,43421411 | 0,15151117  | 0,223985715 |
| gir_mul_klf     | 2,992194309 | 0,720426467 | 0,517590877 | 1,391884012 | 0,163957524 | 0,239276729 |
| gir_mul_10538   | 12,70332479 | -0,43351603 | 0,314801326 | -1,37710992 | 0,168478266 | 0,244905345 |
| gir_mul_egfr-1  | 37,31292413 | -0,45529161 | 0,333667598 | -1,3645065  | 0,172408209 | 0,249711465 |
| gir_mul_nkx1    | 5,035271967 | -0,46233175 | 0,347267373 | -1,33134231 | 0,183076402 | 0,263054586 |
| gir_mul_cgs-pde | 37,78374275 | -0,28994172 | 0,219148581 | -1,32303717 | 0,185823018 | 0,266288281 |
| gir_mul_25626   | 240,2492131 | 0,346239389 | 0,274725365 | 1,26031096  | 0,207557208 | 0,291814985 |
| gir_mul_30263   | 15,61800137 | -0,30250675 | 0,26240367  | -1,15282971 | 0,248980287 | 0,341154077 |
| gir_mul_04256   | 16,77626924 | 0,283640002 | 0,247270188 | 1,147085314 | 0,251346363 | 0,343782737 |
| gir_mul_unc5-2  | 70,2448261  | 0,213761195 | 0,189583681 | 1,127529512 | 0,25951867  | 0,353387125 |
| gir_mul_erm     | 9,144155539 | -0,40001406 | 0,360922168 | -1,10831115 | 0,267727464 | 0,362157098 |
| gir_mul_09627   | 58,13128183 | -0,22197322 | 0,201032185 | -1,10416756 | 0,26952046  | 0,363791902 |
| gir_mul_foxq2   | 13,92670752 | -0,39961191 | 0,431451359 | -0,92620385 | 0,354340051 | 0,4552625   |
| gir_mul_pcdhP-4 | 78,15121231 | -0,24909158 | 0,273357944 | -0,91122863 | 0,362174924 | 0,463970545 |
| gir_mul_arrrb-2 | 9,92108061  | -0,2945209  | 0,340358751 | -0,86532489 | 0,386860494 | 0,490480989 |
| gir_mul_20047   | 128,8591727 | 0,338739108 | 0,39356277  | 0,860699063 | 0,389403809 | 0,493298351 |
| gir_mul_29424   | 202,6166559 | -0,19434755 | 0,231469966 | -0,83962317 | 0,401119706 | 0,503571613 |
| gir_mul_ddc     | 20,77202477 | -0,32828875 | 0,396737656 | -0,8274706  | 0,407970378 | 0,510503056 |
| gir_mul_08086   | 111,4014671 | -0,12656532 | 0,160465953 | -0,78873626 | 0,430266168 | 0,532116614 |
| gir_mul_14918   | 45,47439505 | -0,20773989 | 0,263634796 | -0,78798359 | 0,430706306 | 0,532311113 |
| gir_mul_robo-c  | 169,4709679 | -0,14783067 | 0,20930283  | -0,70630037 | 0,480001364 | 0,581911678 |
| gir_mul_dagk    | 46,90692541 | -0,14575432 | 0,208771659 | -0,69815185 | 0,485082235 | 0,586682136 |
| gir_mul_stim    | 78,09462968 | -0,12671389 | 0,185375722 | -0,68355168 | 0,494258304 | 0,595435886 |
| gir_mul_nanos   | 1,022135205 | -0,46692952 | 0,692579456 | -0,67418909 | 0,500191102 | 0,601639415 |
| gir_mul_sk3     | 47,7433085  | -0,14129458 | 0,216103909 | -0,65382706 | 0,513223232 | 0,612518169 |
| gir_mul_ovo     | 12,17927142 | -0,28129083 | 0,431096204 | -0,6525013  | 0,514077835 | 0,613142001 |
| gir_mul_07357   | 73,09505421 | -0,14010025 | 0,21496033  | -0,65174934 | 0,514562885 | 0,613402089 |
| gir_mul_otxA    | 12,97101867 | 0,150808594 | 0,237348316 | 0,635389358 | 0,525174507 | 0,621469987 |
| gir_mul_eag     | 2,59933617  | -0,23648937 | 0,446715987 | -0,52939537 | 0,596531212 | 0,684967567 |
| gir_mul_04906   | 52,23444444 | -0,16369499 | 0,310338911 | -0,5274717  | 0,597866062 | 0,685570938 |
| gir_mul_atp13   | 59,33096873 | -0,09201678 | 0,189682198 | -0,48511024 | 0,627598146 | 0,71143229  |
| gir_mul_17151   | 21,65875368 | 0,140135576 | 0,293887827 | 0,47683355  | 0,633480653 | 0,715460503 |
| gir_mul_5ht-r2  | 2,155943643 | 0,270455089 | 0,571516516 | 0,473223576 | 0,636053679 | 0,717048405 |
| gir_mul_hcng    | 32,68949777 | -0,10351696 | 0,242917079 | -0,42614112 | 0,67000502  | 0,746556192 |
| gir_mul_27566   | 25,84885509 | 0,098068603 | 0,25810246  | 0,379959971 | 0,703975129 | 0,774297027 |
| gir_mul_17028   | 22,46048454 | -0,11135196 | 0,330911911 | -0,3365003  | 0,736493625 | 0,803162378 |
| gir_mul_31312   | 3,960861055 | -0,12970501 | 0,431429401 | -0,30064017 | 0,763688898 | 0,823754316 |
| gir_mul_ip3r    | 27,56113297 | -0,06652088 | 0,269879036 | -0,24648407 | 0,805307532 | 0,858100845 |
| gir_mul_23489   | 29,78235157 | 0,048728132 | 0,215998582 | 0,225594683 | 0,821516676 | 0,8705413   |

|                 |             |             |             |             |             |             |
|-----------------|-------------|-------------|-------------|-------------|-------------|-------------|
| gir_mul_07503   | 43,2356528  | -0,0376377  | 0,180511281 | -0,20850608 | 0,834833833 | 0,879797439 |
| gir_mul_pis     | 17,65302883 | 0,046272596 | 0,239535508 | 0,193176355 | 0,846820856 | 0,888747993 |
| gir_mul_maguk   | 311,6261645 | 0,034636395 | 0,192037711 | 0,180362464 | 0,856868021 | 0,896254191 |
| gir_mul_plcb    | 29,04438214 | -0,07031593 | 0,43179304  | -0,16284637 | 0,870639395 | 0,906338265 |
| gir_mul_best-b  | 2,265913688 | -0,09722694 | 0,60717025  | -0,16013126 | 0,872777679 | 0,907948875 |
| gir_mul_03496   | 100,8685474 | -0,02012933 | 0,148260112 | -0,13577036 | 0,892002821 | 0,921086611 |
| gir_mul_six-1-2 | 25,89266082 | -0,04265757 | 0,354833638 | -0,12021851 | 0,904310056 | 0,930948102 |
| gir_mul_34343   | 22,87318432 | 0,031473019 | 0,29735115  | 0,105844617 | 0,915705636 | 0,938767716 |
| gir_mul_21613   | 223,8170042 | -0,02686943 | 0,257700686 | -0,10426602 | 0,916958242 | 0,939591635 |
| gir_mul_ddryk   | 46,49176797 | -0,01725445 | 0,249283586 | -0,06921614 | 0,944817577 | 0,962039208 |
| gir_mul_myoVI   | 80,04228741 | 0,016394905 | 0,244402322 | 0,067081624 | 0,946516723 | 0,96313328  |
| gir_mul_00978   | 104,9102211 | -0,00112299 | 0,154010325 | -0,00729168 | 0,994182134 | 0,995802907 |

**Table S3c. Results of the differential gene expression analysis in planarian eye-related gene orthologs. DESeq2 Wald test pair-wise comparison between *D. japonica* and *G. multidiverticulata* morphotypes.**

***D. japonica* and *G. multidiverticulata* non-discernible eyes:**

| gene               | baseMean    | log2FoldChanlfcSE | stat        | pvalue      | padj     |          |
|--------------------|-------------|-------------------|-------------|-------------|----------|----------|
| gir_mul_tph        | 153,8029805 | -5,03251907       | 0,348671258 | -14,433421  | 3,19E-47 | 3,27E-45 |
| gir_mul_27566      | 28,23484008 | 3,540890012       | 0,277635781 | 12,7537236  | 2,97E-37 | 1,72E-35 |
| gir_mul_05359      | 131,6006835 | -2,07157259       | 0,175200131 | -11,8240356 | 2,93E-32 | 1,13E-30 |
| gir_mul_gucy-2     | 41,04313447 | -4,36155839       | 0,374714492 | -11,6396843 | 2,59E-31 | 8,94E-30 |
| gir_mul_pitp       | 187,0888635 | -4,14205808       | 0,36046271  | -11,4909475 | 1,46E-30 | 4,55E-29 |
| gir_mul_03464      | 35,1907097  | -3,06226841       | 0,274453674 | -11,1576878 | 6,57E-29 | 1,84E-27 |
| gir_mul_19866      | 60,57428559 | 3,320809856       | 0,297825608 | 11,15018241 | 7,15E-29 | 1,98E-27 |
| gir_mul_32930      | 101,5093707 | -2,19518286       | 0,206571152 | -10,6267639 | 2,24E-26 | 5,13E-25 |
| gir_mul_eya        | 62,11070008 | -2,63555196       | 0,266237099 | -9,89926634 | 4,19E-23 | 7,32E-22 |
| gir_mul_cds        | 106,6824874 | -1,40046762       | 0,163301574 | -8,57595909 | 9,83E-18 | 1,05E-16 |
| gir_mul_trpc-2     | 159,7072354 | -2,42247824       | 0,295190324 | -8,2064961  | 2,28E-16 | 2,19E-15 |
| gir_mul_cdkl1      | 30,18440601 | -2,34751041       | 0,287198644 | -8,17382135 | 2,99E-16 | 2,82E-15 |
| gir_mul_soxB       | 45,11260262 | -2,34207715       | 0,287345703 | -8,15072966 | 3,62E-16 | 3,36E-15 |
| gir_mul_ddc        | 55,74058598 | -2,86328954       | 0,354170438 | -8,08449613 | 6,24E-16 | 5,59E-15 |
| gir_mul_12199      | 255,3949138 | -1,76893307       | 0,232202412 | -7,61806503 | 2,58E-14 | 1,93E-13 |
| gir_mul_5ht-r2     | 8,761452344 | -3,62819016       | 0,487955472 | -7,43549434 | 1,04E-13 | 7,23E-13 |
| gir_mul_ncx        | 270,6417297 | -1,05010164       | 0,144646505 | -7,25977884 | 3,88E-13 | 2,54E-12 |
| gir_mul_cng        | 12,40662764 | -2,17982303       | 0,302112922 | -7,21525918 | 5,38E-13 | 3,50E-12 |
| gir_mul_best-b     | 8,188754373 | -3,40690395       | 0,48080514  | -7,08583098 | 1,38E-12 | 8,63E-12 |
| gir_mul_cgs-pde    | 45,73559461 | -1,78799006       | 0,252698165 | -7,07559573 | 1,49E-12 | 9,25E-12 |
| gir_mul_pcdhP-4    | 115,3713379 | -1,70359822       | 0,240773042 | -7,07553555 | 1,49E-12 | 9,25E-12 |
| gir_mul_27330      | 91,74803745 | -1,41765112       | 0,20079995  | -7,06001733 | 1,66E-12 | 1,03E-11 |
| gir_mul_tyrosinase | 50,53397091 | -2,89920792       | 0,415340054 | -6,98032345 | 2,95E-12 | 1,79E-11 |
| gir_mul_ip3k       | 92,14420043 | -2,05059943       | 0,297612806 | -6,89015859 | 5,57E-12 | 3,26E-11 |
| gir_mul_06952      | 19,26149997 | 1,762882702       | 0,259299516 | 6,798634748 | 1,06E-11 | 5,92E-11 |
| gir_mul_32587      | 26,62940623 | -2,01189721       | 0,297552827 | -6,76147904 | 1,37E-11 | 7,54E-11 |
| gir_mul_rgs6-7-9   | 211,5721064 | 1,152841171       | 0,178163317 | 6,470698836 | 9,76E-11 | 4,87E-10 |
| gir_mul_fzdP-1     | 160,8554709 | -2,22073506       | 0,345602288 | -6,42569549 | 1,31E-10 | 6,42E-10 |
| gir_mul_22592      | 9,492110535 | -3,2432337        | 0,506945944 | -6,39759277 | 1,58E-10 | 7,64E-10 |
| gir_mul_07503      | 38,0956337  | 1,05668351        | 0,16638846  | 6,350701898 | 2,14E-10 | 1,02E-09 |
| gir_mul_07357      | 133,7911204 | -1,48927096       | 0,234526748 | -6,35011135 | 2,15E-10 | 1,02E-09 |
| gir_mul_gpcrP-1    | 32,15634575 | -1,95207474       | 0,310629363 | -6,28425697 | 3,29E-10 | 1,52E-09 |
| gir_mul_03129      | 62,22823339 | -1,60584688       | 0,260620425 | -6,16163094 | 7,20E-10 | 3,19E-09 |
| gir_mul_17151      | 37,51809702 | -1,40197248       | 0,234576135 | -5,97662023 | 2,28E-09 | 9,55E-09 |
| gir_mul_15984      | 136,8689669 | -1,12166074       | 0,190738312 | -5,88062632 | 4,09E-09 | 1,66E-08 |
| gir_mul_29449      | 34,9954216  | -2,58942107       | 0,442269153 | -5,85485342 | 4,77E-09 | 1,92E-08 |
| gir_mul_eag        | 9,21119092  | -3,31892413       | 0,582953259 | -5,69329371 | 1,25E-08 | 4,81E-08 |
| gir_mul_cpo        | 7,68867504  | -3,38697847       | 0,604012996 | -5,6074596  | 2,05E-08 | 7,77E-08 |
| gir_mul_01362      | 64,96532255 | -1,84926229       | 0,33390355  | -5,53831276 | 3,05E-08 | 1,12E-07 |
| gir_mul_29424      | 265,3517904 | -1,23695754       | 0,22473877  | -5,50397929 | 3,71E-08 | 1,35E-07 |
| gir_mul_arrestin   | 347,8164149 | -2,56112677       | 0,46956091  | -5,45430148 | 4,92E-08 | 1,77E-07 |

|                 |             |             |             |             |             |             |
|-----------------|-------------|-------------|-------------|-------------|-------------|-------------|
| gir_mul_20047   | 199,1218002 | -1,60402612 | 0,295463286 | -5,42885087 | 5,67E-08    | 2,02E-07    |
| gir_mul_34307   | 10,76524664 | -1,88811301 | 0,348598646 | -5,41629473 | 6,08E-08    | 2,15E-07    |
| gir_mul_gna-o   | 148,3295723 | -1,69429811 | 0,31508819  | -5,37721871 | 7,56E-08    | 2,63E-07    |
| gir_mul_09627   | 98,15064895 | -1,46219167 | 0,273095247 | -5,35414545 | 8,60E-08    | 2,98E-07    |
| gir_mul_pis     | 31,30104604 | -1,00711166 | 0,196989166 | -5,11252308 | 3,18E-07    | 1,04E-06    |
| gir_mul_dlx     | 29,67767601 | -1,24676089 | 0,24486327  | -5,09166152 | 3,55E-07    | 1,15E-06    |
| gir_mul_13049   | 71,18934317 | 1,796568716 | 0,361359302 | 4,971696337 | 6,64E-07    | 2,07E-06    |
| gir_mul_59sley  | 12,22706275 | -1,70951447 | 0,344220616 | -4,96633378 | 6,82E-07    | 2,13E-06    |
| gir_mul_stim    | 99,28614226 | -0,71575425 | 0,145814356 | -4,90866789 | 9,17E-07    | 2,78E-06    |
| gir_mul_dagk    | 89,20610762 | -1,2596388  | 0,2584168   | -4,87444625 | 1,09E-06    | 3,26E-06    |
| gir_mul_pctaire | 31,92360801 | -1,15640945 | 0,237947843 | -4,85992825 | 1,17E-06    | 3,48E-06    |
| gir_mul_23802   | 4,990131495 | -1,98988282 | 0,409529994 | -4,8589428  | 1,18E-06    | 3,49E-06    |
| gir_mul_30263   | 35,40590614 | -1,40265376 | 0,294432872 | -4,76391699 | 1,90E-06    | 5,49E-06    |
| gir_mul_pde1c   | 50,62383167 | -1,45611305 | 0,306562382 | -4,74980994 | 2,04E-06    | 5,87E-06    |
| gir_mul_04256   | 36,98884852 | -0,98428782 | 0,208897001 | -4,71183318 | 2,45E-06    | 6,99E-06    |
| gir_mul_rops2   | 81,0802012  | -1,710034   | 0,367441512 | -4,65389442 | 3,26E-06    | 9,11E-06    |
| gir_mul_26028   | 178,7276827 | 0,768827022 | 0,168530244 | 4,561952808 | 5,07E-06    | 1,38E-05    |
| gir_mul_crf-r   | 7,98992237  | 1,913715651 | 0,422450132 | 4,53003918  | 5,90E-06    | 1,60E-05    |
| gir_mul_ip3r    | 45,44305144 | -1,28888978 | 0,287451157 | -4,48385664 | 7,33E-06    | 1,95E-05    |
| gir_mul_08086   | 142,5405381 | -0,6955385  | 0,155329272 | -4,47783272 | 7,54E-06    | 2,01E-05    |
| gir_mul_nkx1    | 7,019976608 | -1,37918989 | 0,316570524 | -4,3566592  | 1,32E-05    | 3,42E-05    |
| gir_mul_otxA    | 24,32650281 | -1,23138578 | 0,285834637 | -4,30803557 | 1,65E-05    | 4,21E-05    |
| gir_mul_5ht-r1  | 44,9736021  | -1,0386708  | 0,241146154 | -4,30722522 | 1,65E-05    | 4,22E-05    |
| gir_mul_23388   | 140,243473  | -0,71933754 | 0,168251472 | -4,27537143 | 1,91E-05    | 4,84E-05    |
| gir_mul_23489   | 43,47255801 | -0,8342798  | 0,195978544 | -4,2569956  | 2,07E-05    | 5,24E-05    |
| gir_mul_22239   | 8,776282303 | -1,57925874 | 0,371088152 | -4,25575092 | 2,08E-05    | 5,26E-05    |
| gir_mul_foxq2   | 20,69925399 | -1,4321633  | 0,348919886 | -4,10456199 | 4,05E-05    | 9,74E-05    |
| gir_mul_14918   | 67,53209867 | -1,25340387 | 0,307322003 | -4,07847099 | 4,53E-05    | 0,000108446 |
| gir_mul_21613   | 271,8290499 | -0,90787957 | 0,227897561 | -3,98371782 | 6,78E-05    | 0,000159569 |
| gir_mul_plcb    | 66,09165263 | -2,03814472 | 0,511914264 | -3,98141811 | 6,85E-05    | 0,000160731 |
| gir_mul_20488   | 51,6241986  | -0,91562126 | 0,232321835 | -3,94117608 | 8,11E-05    | 0,000188682 |
| gir_mul_04136   | 10,727532   | 2,268769993 | 0,576045126 | 3,938528236 | 8,20E-05    | 0,000190344 |
| gir_mul_21691   | 73,35683266 | 1,503809153 | 0,382451997 | 3,932020664 | 8,42E-05    | 0,000195277 |
| gir_mul_sk3     | 52,27470547 | -0,65754965 | 0,168821931 | -3,89493027 | 9,82E-05    | 0,00022601  |
| gir_mul_pmca2   | 43,58350078 | -1,09063283 | 0,284042412 | -3,83968303 | 0,000123193 | 0,000279481 |
| gir_mul_12518   | 13,50783314 | -1,55135244 | 0,4098828   | -3,78486834 | 0,00015379  | 0,000343963 |
| gir_mul_meis    | 39,68757444 | -0,9660363  | 0,25615587  | -3,7712831  | 0,00016241  | 0,0003623   |
| gir_mul_20798   | 27,87538524 | 0,931040883 | 0,251378465 | 3,703741614 | 0,000212443 | 0,00046613  |
| gir_mul_myoVIIA | 247,1958078 | 1,219533793 | 0,329783932 | 3,697978208 | 0,000217324 | 0,00047616  |
| gir_mul_qdr     | 89,78470674 | 1,432073851 | 0,388275205 | 3,688295911 | 0,000225761 | 0,00049289  |
| gir_mul_23244   | 71,65985833 | -0,62994139 | 0,172099777 | -3,66032661 | 0,000251894 | 0,000546066 |
| gir_mul_maguk   | 188,3900653 | 1,071810515 | 0,293073755 | 3,65713578  | 0,000255049 | 0,000552517 |
| gir_mul_07486   | 14,83594602 | -1,42065767 | 0,39832324  | -3,56659498 | 0,00036165  | 0,000765877 |
| gir_mul_nhe-rf  | 34,22547868 | 0,955072874 | 0,268251552 | 3,5603629   | 0,000370343 | 0,000782428 |
| gir_mul_gls     | 13,01514448 | -1,35186858 | 0,393953389 | -3,43154449 | 0,000600155 | 0,001230737 |
| gir_mul_01915   | 87,8911569  | -0,51125507 | 0,14959671  | -3,41755558 | 0,000631862 | 0,001288026 |

|                     |             |             |             |             |             |             |
|---------------------|-------------|-------------|-------------|-------------|-------------|-------------|
| gir_mul_17028       | 24,18822422 | -1,09001114 | 0,327227169 | -3,33105331 | 0,00086518  | 0,001731487 |
| gir_mul_02471       | 28,90280463 | -0,81248101 | 0,248149782 | -3,27415564 | 0,001059782 | 0,002090995 |
| gir_mul_04906       | 58,39761028 | -0,86971689 | 0,269858239 | -3,22286581 | 0,00126915  | 0,00246922  |
| gir_mul_unc5-2      | 131,7490539 | -0,69386469 | 0,215319525 | -3,22248849 | 0,001270823 | 0,00247091  |
| gir_mul_25626       | 245,7170577 | -0,91225709 | 0,285376832 | -3,19667537 | 0,001390213 | 0,002682683 |
| gir_mul_hcng        | 48,73450429 | -1,19896096 | 0,38211404  | -3,13770455 | 0,001702764 | 0,003235041 |
| gir_mul_09268       | 67,96501731 | 0,635664292 | 0,210896062 | 3,014111719 | 0,002577329 | 0,004755527 |
| gir_mul_16656       | 23,04685092 | -0,91584081 | 0,308996489 | -2,96391981 | 0,003037474 | 0,005541363 |
| gir_mul_09132       | 22,20592293 | -0,90872946 | 0,306957611 | -2,96043956 | 0,003072004 | 0,005591083 |
| gir_mul_ninag       | 4,776976631 | -1,52419932 | 0,519465053 | -2,93417104 | 0,003344399 | 0,006029725 |
| gir_mul_10513       | 87,06467042 | 0,388106534 | 0,140148191 | 2,769258241 | 0,005618408 | 0,009735619 |
| gir_mul_nanos       | 1,852619331 | 1,78423075  | 0,658765505 | 2,70844593  | 0,006759913 | 0,011538019 |
| gir_mul_ddryk       | 42,48694459 | -0,69836274 | 0,258647506 | -2,70005596 | 0,006932781 | 0,01181995  |
| gir_mul_32281       | 373,5025628 | 0,897222766 | 0,336414851 | 2,667012953 | 0,007652872 | 0,012954256 |
| gir_mul_robo-c      | 227,250325  | -0,62302083 | 0,236794468 | -2,6310616  | 0,008511861 | 0,014282456 |
| gir_mul_03496       | 161,8743697 | -0,51939693 | 0,20060751  | -2,58912006 | 0,009622154 | 0,015988379 |
| gir_mul_34512       | 27,07689255 | -0,6938667  | 0,27759634  | -2,49955276 | 0,012435018 | 0,020289409 |
| gir_mul_klf         | 8,477726283 | -1,1643169  | 0,50744474  | -2,29447034 | 0,021763497 | 0,034046305 |
| gir_mul_34343       | 32,82586646 | -0,52826206 | 0,234390513 | -2,25376896 | 0,024210707 | 0,037644771 |
| gir_mul_13405       | 102,4808936 | -0,77454847 | 0,352910404 | -2,19474535 | 0,02818187  | 0,043207515 |
| gir_mul_six-1-2     | 37,17700369 | -0,91920313 | 0,424192686 | -2,16694714 | 0,030238885 | 0,046062603 |
| gir_mul_nol1        | 6,615666349 | -0,73872736 | 0,344553317 | -2,14401466 | 0,032031712 | 0,048433587 |
| gir_mul_31312       | 2,849099128 | -0,95524394 | 0,476328139 | -2,00543253 | 0,044916827 | 0,066095896 |
| gir_mul_arb-2       | 12,13933403 | -0,62130039 | 0,323228486 | -1,92217089 | 0,054584258 | 0,078554312 |
| gir_mul_09274       | 59,23856511 | -0,53170917 | 0,285179659 | -1,86447088 | 0,062255608 | 0,088150041 |
| gir_mul_33093       | 146,21471   | -0,44677743 | 0,241406747 | -1,8507247  | 0,064209169 | 0,090499306 |
| gir_mul_transferrin | 6,367746159 | -0,78566168 | 0,455707509 | -1,72404813 | 0,084699154 | 0,116234464 |
| gir_mul_unc5-1      | 101,2286112 | 0,585570262 | 0,34840865  | 1,68069955  | 0,092821288 | 0,126309269 |
| gir_mul_ttbk        | 35,13464157 | 0,594498136 | 0,355708234 | 1,671308337 | 0,094660791 | 0,128584742 |
| gir_mul_gpcrP-2     | 17,26936823 | -0,55877344 | 0,347549869 | -1,60775041 | 0,107889854 | 0,144385464 |
| gir_mul_00978       | 148,9013267 | -0,25998965 | 0,181899088 | -1,42930707 | 0,152915994 | 0,198004957 |
| gir_mul_nf-i-a      | 40,22991434 | 0,311221358 | 0,221206956 | 1,406923921 | 0,159449949 | 0,205599473 |
| gir_mul_sp6-9       | 1,712131253 | 0,837951154 | 0,673419812 | 1,244322099 | 0,213381041 | 0,266206704 |
| gir_mul_28813       | 15,36626653 | -0,4970591  | 0,409922237 | -1,21256924 | 0,225294555 | 0,279143676 |
| gir_mul_cdh23       | 24,27639358 | -0,39194316 | 0,344056526 | -1,13918247 | 0,254627054 | 0,310604589 |
| gir_mul_erm         | 12,70555631 | -0,51107166 | 0,461317913 | -1,10785132 | 0,267926032 | 0,325535424 |
| gir_mul_26962       | 185,2625559 | -0,22764108 | 0,23459958  | -0,97033883 | 0,331877629 | 0,390728392 |
| gir_mul_atp13       | 81,81563203 | -0,22197406 | 0,249247391 | -0,89057725 | 0,37315601  | 0,434500596 |
| gir_mul_gna-q       | 118,8360515 | 0,430402727 | 0,486293353 | 0,885068084 | 0,376119912 | 0,437620215 |
| gir_mul_smad6-7-2   | 64,83547997 | 0,305874062 | 0,403507535 | 0,758038042 | 0,448428209 | 0,510165919 |
| gir_mul_best-a      | 7,149815895 | 0,333387722 | 0,568960709 | 0,585959131 | 0,55790298  | 0,616460733 |
| gir_mul_inpp5       | 59,83665551 | -0,11334885 | 0,204975951 | -0,55298607 | 0,580272947 | 0,637740093 |
| gir_mul_09720       | 14,94311608 | -0,20889812 | 0,407882647 | -0,5121525  | 0,608544281 | 0,665480298 |
| gir_mul_abl         | 78,1429457  | 0,108222891 | 0,26416171  | 0,409684246 | 0,682037588 | 0,731791814 |
| gir_mul_08711       | 36,99630071 | -0,14547186 | 0,368101376 | -0,3951951  | 0,692698911 | 0,741676154 |
| gir_mul_fzdP-2      | 276,0584718 | -0,09446611 | 0,239424463 | -0,39455496 | 0,693171356 | 0,741676154 |

|                |             |             |             |             |             |             |
|----------------|-------------|-------------|-------------|-------------|-------------|-------------|
| gir_mul_sans   | 7,87361062  | 0,166863729 | 0,462403321 | 0,360861874 | 0,718202706 | 0,763929107 |
| gir_mul_10538  | 13,42763718 | 0,121330991 | 0,422721552 | 0,287023433 | 0,774094378 | 0,813526878 |
| gir_mul_11992  | 18,29816225 | 0,070053191 | 0,312920986 | 0,223868624 | 0,82285953  | 0,855417719 |
| gir_mul_egfr-1 | 37,87951788 | 0,052573399 | 0,276301689 | 0,190275344 | 0,849093373 | 0,878825936 |
| gir_mul_08883  | 55,95030536 | -0,02115287 | 0,186366988 | -0,11350114 | 0,909633261 | 0,928665774 |
| gir_mul_myoVI  | 121,9402657 | -0,01422925 | 0,263481803 | -0,0540047  | 0,956931423 | 0,966045055 |
| gir_mul_ovo    | 9,396048794 | 0,014828965 | 0,49011659  | 0,030255996 | 0,975862891 | 0,980007359 |

***D. japonica* and *G. multidiverticulata* discernible eyes:**

| gene             | baseMean    | log2FoldChanlfcSE | stat        | pvalue      | padj     |          |
|------------------|-------------|-------------------|-------------|-------------|----------|----------|
| gir_mul_gucy-2   | 47,29734913 | -3,47511534       | 0,29155388  | -11,9192903 | 9,39E-33 | 2,70E-31 |
| gir_mul_tph      | 173,6985379 | -4,23998664       | 0,362817463 | -11,6862805 | 1,50E-31 | 3,91E-30 |
| gir_mul_05359    | 143,6338907 | -2,24269132       | 0,195551328 | -11,4685558 | 1,90E-30 | 4,56E-29 |
| gir_mul_pitp     | 215,5289694 | -3,30438302       | 0,296019283 | -11,1627289 | 6,21E-29 | 1,38E-27 |
| gir_mul_27566    | 20,07838391 | 2,820627156       | 0,27347683  | 10,31395294 | 6,09E-25 | 1,02E-23 |
| gir_mul_19866    | 54,3594172  | 2,979965057       | 0,295059065 | 10,09955435 | 5,55E-24 | 8,71E-23 |
| gir_mul_gna-q    | 114,9988242 | 1,74272705        | 0,183233616 | 9,510957023 | 1,89E-21 | 2,54E-20 |
| gir_mul_eya      | 72,94276954 | -2,03430787       | 0,218914863 | -9,29268958 | 1,50E-20 | 1,90E-19 |
| gir_mul_03464    | 41,30467833 | -2,32175088       | 0,250277893 | -9,27669181 | 1,75E-20 | 2,20E-19 |
| gir_mul_cds      | 119,2054641 | -1,34334722       | 0,147642247 | -9,09866418 | 9,14E-20 | 1,07E-18 |
| gir_mul_rgs6-7-9 | 274,8132953 | 1,480824012       | 0,185838191 | 7,9683514   | 1,61E-15 | 1,22E-14 |
| gir_mul_07486    | 13,79210009 | -2,60141896       | 0,334790035 | -7,77029985 | 7,83E-15 | 5,56E-14 |
| gir_mul_trpc-2   | 181,7155862 | -2,16944651       | 0,28172317  | -7,70063218 | 1,35E-14 | 9,36E-14 |
| gir_mul_26028    | 223,6031558 | 1,039175036       | 0,140841618 | 7,378323602 | 1,60E-13 | 1,01E-12 |
| gir_mul_ncx      | 315,5092194 | -0,81772525       | 0,111388001 | -7,34123284 | 2,12E-13 | 1,31E-12 |
| gir_mul_06952    | 18,63253488 | 1,536672175       | 0,212360723 | 7,236141181 | 4,62E-13 | 2,77E-12 |
| gir_mul_32930    | 127,2938636 | -1,33498959       | 0,191183902 | -6,98275102 | 2,89E-12 | 1,63E-11 |
| gir_mul_soxB     | 57,45442704 | -1,33837138       | 0,192305073 | -6,95962598 | 3,41E-12 | 1,90E-11 |
| gir_mul_22592    | 10,11041135 | -3,2302425        | 0,47718163  | -6,76941923 | 1,29E-11 | 6,75E-11 |
| gir_mul_5ht-r2   | 10,56551029 | -2,40156581       | 0,356636418 | -6,73393319 | 1,65E-11 | 8,51E-11 |
| gir_mul_07503    | 42,61885469 | 1,056125677       | 0,157547311 | 6,703546195 | 2,03E-11 | 1,04E-10 |
| gir_mul_ip3k     | 108,3673752 | -1,66540634       | 0,252943168 | -6,58411277 | 4,58E-11 | 2,27E-10 |
| gir_mul_gls      | 12,52598137 | -2,05744171       | 0,315291859 | -6,52551486 | 6,78E-11 | 3,32E-10 |
| gir_mul_23802    | 5,278322007 | -2,83881426       | 0,446414169 | -6,3591491  | 2,03E-10 | 9,46E-10 |
| gir_mul_best-b   | 9,98713566  | -2,3397426        | 0,379880184 | -6,1591594  | 7,31E-10 | 3,20E-09 |
| gir_mul_ddc      | 67,21041508 | -2,05840485       | 0,336009524 | -6,12603127 | 9,01E-10 | 3,87E-09 |
| gir_mul_cng      | 13,94393462 | -2,02506721       | 0,333989761 | -6,06326135 | 1,33E-09 | 5,63E-09 |
| gir_mul_21691    | 100,3583243 | 1,925478872       | 0,317603956 | 6,062515387 | 1,34E-09 | 5,65E-09 |
| gir_mul_04256    | 40,12653755 | -1,13335673       | 0,190588657 | -5,94661166 | 2,74E-09 | 1,11E-08 |
| gir_mul_09268    | 91,5840411  | 1,085281342       | 0,183268599 | 5,921807371 | 3,18E-09 | 1,29E-08 |
| gir_mul_04136    | 17,45636446 | 3,030659064       | 0,520812691 | 5,819096035 | 5,92E-09 | 2,32E-08 |
| gir_mul_30263    | 38,7318847  | -1,44725004       | 0,249010739 | -5,81199848 | 6,17E-09 | 2,41E-08 |
| gir_mul_pis      | 35,57046082 | -0,92669247       | 0,168302392 | -5,50611585 | 3,67E-08 | 1,30E-07 |
| gir_mul_maguk    | 277,7518137 | 1,644300131       | 0,304833863 | 5,394086185 | 6,89E-08 | 2,37E-07 |
| gir_mul_08711    | 26,78609121 | -1,98076559       | 0,370931135 | -5,33998202 | 9,30E-08 | 3,15E-07 |
| gir_mul_03129    | 72,70656724 | -1,27839836       | 0,239941624 | -5,32795579 | 9,93E-08 | 3,32E-07 |

|                  |             |             |             |             |             |             |
|------------------|-------------|-------------|-------------|-------------|-------------|-------------|
| gir_mul_32587    | 32,47288449 | -1,29648424 | 0,243633414 | -5,32145496 | 1,03E-07    | 3,43E-07    |
| gir_mul_eag      | 10,92308138 | -2,27365684 | 0,432071128 | -5,26222812 | 1,42E-07    | 4,65E-07    |
| gir_mul_cpo      | 8,655056576 | -2,74425754 | 0,523398115 | -5,24315519 | 1,58E-07    | 5,11E-07    |
| gir_mul_32281    | 629,6405066 | 1,773070929 | 0,343489485 | 5,16193656  | 2,44E-07    | 7,75E-07    |
| gir_mul_dlx      | 33,65023782 | -1,11605843 | 0,216276706 | -5,16032658 | 2,47E-07    | 7,81E-07    |
| gir_mul_dagk     | 101,4510148 | -1,14834615 | 0,22718996  | -5,0545638  | 4,31E-07    | 1,33E-06    |
| gir_mul_cdkl1    | 37,19277284 | -1,50199737 | 0,300672226 | -4,99546428 | 5,87E-07    | 1,77E-06    |
| gir_mul_01362    | 74,71814913 | -1,57406929 | 0,315658892 | -4,98661478 | 6,14E-07    | 1,85E-06    |
| gir_mul_28813    | 13,63183114 | -1,51364162 | 0,306785323 | -4,93387885 | 8,06E-07    | 2,38E-06    |
| gir_mul_12199    | 330,7656124 | -0,91844522 | 0,188222888 | -4,87956185 | 1,06E-06    | 3,10E-06    |
| gir_mul_nf-i-a   | 57,82296929 | 0,934436301 | 0,19233942  | 4,858267242 | 1,18E-06    | 3,43E-06    |
| gir_mul_fzdP-1   | 193,1891968 | -1,60544612 | 0,330856573 | -4,85239301 | 1,22E-06    | 3,53E-06    |
| gir_mul_07357    | 156,5673652 | -1,15230914 | 0,237654534 | -4,84867309 | 1,24E-06    | 3,59E-06    |
| gir_mul_02471    | 30,62364062 | -1,1038474  | 0,231798786 | -4,76209311 | 1,92E-06    | 5,42E-06    |
| gir_mul_arrestin | 409,8793608 | -2,08531353 | 0,452402196 | -4,60942397 | 4,04E-06    | 1,10E-05    |
| gir_mul_foxq2    | 23,94419931 | -1,25275894 | 0,278198854 | -4,50310603 | 6,70E-06    | 1,78E-05    |
| gir_mul_27330    | 112,982079  | -0,90350408 | 0,20139335  | -4,48626572 | 7,25E-06    | 1,92E-05    |
| gir_mul_rops2    | 89,93070978 | -1,72603081 | 0,390361457 | -4,421622   | 9,80E-06    | 2,54E-05    |
| gir_mul_34307    | 12,97390527 | -1,3324615  | 0,314850019 | -4,23205151 | 2,32E-05    | 5,71E-05    |
| gir_mul_11992    | 30,49158285 | 1,148832543 | 0,271787938 | 4,226944544 | 2,37E-05    | 5,83E-05    |
| gir_mul_03496    | 174,0522315 | -0,63293578 | 0,151003628 | -4,19152696 | 2,77E-05    | 6,71E-05    |
| gir_mul_23388    | 158,9608597 | -0,62186851 | 0,148428642 | -4,18967997 | 2,79E-05    | 6,76E-05    |
| gir_mul_crf-r    | 7,527397152 | 1,661912936 | 0,398505898 | 4,170359696 | 3,04E-05    | 7,31E-05    |
| gir_mul_gna-o    | 192,1664727 | -0,85621756 | 0,210192927 | -4,07348415 | 4,63E-05    | 0,000109372 |
| gir_mul_ip3r     | 53,9650476  | -0,99968275 | 0,246626588 | -4,05342651 | 5,05E-05    | 0,000118553 |
| gir_mul_10513    | 99,27040542 | 0,474396426 | 0,1176106   | 4,033619638 | 5,49E-05    | 0,000128518 |
| gir_mul_29449    | 43,63309682 | -1,64409573 | 0,41801245  | -3,93312623 | 8,38E-05    | 0,000190547 |
| gir_mul_09627    | 117,3167463 | -1,08750224 | 0,281976485 | -3,85671253 | 0,000114922 | 0,000255503 |
| gir_mul_17151    | 44,97215907 | -0,93498275 | 0,251509199 | -3,71748928 | 0,000201213 | 0,000433869 |
| gir_mul_plcb     | 78,35721672 | -1,58432589 | 0,427396156 | -3,70692592 | 0,00020979  | 0,0004511   |
| gir_mul_unc5-2   | 143,1634822 | -0,79836384 | 0,219480672 | -3,6375132  | 0,000275283 | 0,000580169 |
| gir_mul_pcdhP-4  | 145,8178096 | -0,96250732 | 0,265598947 | -3,62391239 | 0,00029018  | 0,000609893 |
| gir_mul_otxA     | 28,72993003 | -0,88879877 | 0,251013465 | -3,54084101 | 0,000398854 | 0,000826447 |
| gir_mul_13049    | 59,5422596  | 1,221399533 | 0,346035883 | 3,529690393 | 0,000416046 | 0,000859191 |
| gir_mul_myoVIIA  | 252,5117506 | 1,036396634 | 0,298545595 | 3,47148526  | 0,000517588 | 0,001052622 |
| gir_mul_23244    | 82,56102097 | -0,51019819 | 0,148719981 | -3,43059611 | 0,000602257 | 0,001215973 |
| gir_mul_stim     | 118,3179309 | -0,41283591 | 0,124204113 | -3,32385057 | 0,000887838 | 0,001744493 |
| gir_mul_gpcrP-1  | 41,55637889 | -1,02716044 | 0,316107295 | -3,24940441 | 0,001156469 | 0,002218489 |
| gir_mul_cgs-pde  | 61,95237678 | -0,71135514 | 0,220131411 | -3,23150222 | 0,001231414 | 0,002351992 |
| gir_mul_ttbk     | 45,9251801  | 1,003021607 | 0,319524519 | 3,139106852 | 0,001694636 | 0,003164075 |
| gir_mul_pctaire  | 40,12931928 | -0,54240832 | 0,173228634 | -3,13117007 | 0,001741113 | 0,003244945 |
| gir_mul_22239    | 11,19721954 | -0,88467081 | 0,282682798 | -3,12955304 | 0,001750725 | 0,003260884 |
| gir_mul_klf      | 9,329079876 | -1,28569664 | 0,415561183 | -3,0938805  | 0,00197557  | 0,003645402 |
| gir_mul_15984    | 171,4638579 | -0,59606607 | 0,194009891 | -3,07234885 | 0,002123814 | 0,003906141 |
| gir_mul_23489    | 52,29887175 | -0,56913947 | 0,18526746  | -3,07198833 | 0,00212638  | 0,003908526 |
| gir_mul_01915    | 100,1329264 | -0,41635364 | 0,136944947 | -3,04029943 | 0,002363431 | 0,004295497 |

|                     |             |             |             |             |             |             |
|---------------------|-------------|-------------|-------------|-------------|-------------|-------------|
| gir_mul_nkx1        | 8,50652825  | -0,81661911 | 0,282052265 | -2,89527585 | 0,003788255 | 0,006664643 |
| gir_mul_robo-c      | 261,538134  | -0,47979742 | 0,166600141 | -2,87993407 | 0,003977583 | 0,006957944 |
| gir_mul_20047       | 261,5074733 | -0,7404494  | 0,262646049 | -2,81919107 | 0,004814485 | 0,008313227 |
| gir_mul_08086       | 170,6523874 | -0,40238304 | 0,144868714 | -2,7775703  | 0,005476699 | 0,009377743 |
| gir_mul_14918       | 81,18049707 | -0,84672701 | 0,306751196 | -2,76030549 | 0,005774733 | 0,00983879  |
| gir_mul_29424       | 334,77734   | -0,66170701 | 0,241982424 | -2,73452509 | 0,006247033 | 0,010596539 |
| gir_mul_00978       | 161,2078087 | -0,32435744 | 0,121774002 | -2,66360168 | 0,007730904 | 0,012907212 |
| gir_mul_pde1c       | 64,37232016 | -0,72052505 | 0,272479462 | -2,64432794 | 0,008185331 | 0,01362156  |
| gir_mul_cdh23       | 23,93840646 | -0,86007708 | 0,35080824  | -2,45170148 | 0,014218256 | 0,022821896 |
| gir_mul_20488       | 62,36349577 | -0,53170868 | 0,219903254 | -2,41792092 | 0,015609469 | 0,024809058 |
| gir_mul_smad6-7-2   | 86,94089398 | 0,771517261 | 0,321177233 | 2,402154267 | 0,016298833 | 0,025811379 |
| gir_mul_nol1        | 7,10705683  | -0,87218783 | 0,371264483 | -2,34923584 | 0,018811987 | 0,029531503 |
| gir_mul_nhe-rf      | 31,68505915 | 0,55166728  | 0,236119023 | 2,336394893 | 0,01947067  | 0,030473678 |
| gir_mul_34343       | 36,77895705 | -0,46071308 | 0,200138877 | -2,30196693 | 0,021337037 | 0,033242564 |
| gir_mul_hcng        | 59,31238791 | -0,75560941 | 0,335166171 | -2,25443221 | 0,024168991 | 0,03729588  |
| gir_mul_abl         | 100,4273238 | 0,516788027 | 0,229542254 | 2,251385174 | 0,024361152 | 0,037548775 |
| gir_mul_09274       | 66,81865554 | -0,43083671 | 0,191794957 | -2,24634013 | 0,02468223  | 0,037992607 |
| gir_mul_atp13       | 88,28360111 | -0,33970278 | 0,165196906 | -2,05635072 | 0,039748723 | 0,058716669 |
| gir_mul_20798       | 24,56491905 | 0,398543983 | 0,198917578 | 2,003563421 | 0,045116848 | 0,065762454 |
| gir_mul_meis        | 50,41345108 | -0,39749752 | 0,210821492 | -1,88546964 | 0,059366459 | 0,08484468  |
| gir_mul_six-1-2     | 44,23437095 | -0,66389844 | 0,380805626 | -1,74340501 | 0,081262893 | 0,112027743 |
| gir_mul_ninag       | 5,980235334 | -0,86103132 | 0,560096171 | -1,53729192 | 0,124221839 | 0,164329577 |
| gir_mul_08883       | 57,69060176 | -0,25360743 | 0,165815377 | -1,52945662 | 0,126151284 | 0,166595494 |
| gir_mul_erm         | 13,94444961 | -0,59090857 | 0,408061476 | -1,44808713 | 0,147592683 | 0,191621387 |
| gir_mul_pmca2       | 56,72063055 | -0,4469925  | 0,309066116 | -1,44626821 | 0,148101989 | 0,192201527 |
| gir_mul_unc5-1      | 110,5869832 | 0,517511614 | 0,364720725 | 1,41892571  | 0,155920676 | 0,201329383 |
| gir_mul_21613       | 348,1944033 | -0,37150409 | 0,266960768 | -1,39160556 | 0,164041874 | 0,211018748 |
| gir_mul_26962       | 246,7531101 | 0,32405787  | 0,236726263 | 1,368913893 | 0,171026193 | 0,219178507 |
| gir_mul_59sley      | 17,33654222 | -0,37830496 | 0,294600816 | -1,28412733 | 0,199097408 | 0,251177829 |
| gir_mul_31312       | 4,747610142 | 0,444026538 | 0,355454352 | 1,249180196 | 0,211599174 | 0,265210044 |
| gir_mul_04906       | 74,48228561 | -0,30879657 | 0,248160139 | -1,24434397 | 0,213372995 | 0,266998253 |
| gir_mul_inpp5       | 74,11058048 | 0,218110481 | 0,180186027 | 1,210473895 | 0,226097102 | 0,28173164  |
| gir_mul_myoVI       | 124,1063916 | -0,31726595 | 0,264643404 | -1,19884323 | 0,230588908 | 0,286479233 |
| gir_mul_sk3         | 66,45092404 | -0,18509387 | 0,15830554  | -1,16921915 | 0,242315348 | 0,29931928  |
| gir_mul_tyrosinase  | 81,42932333 | -0,52405425 | 0,452212678 | -1,15886678 | 0,246510491 | 0,303405112 |
| gir_mul_12518       | 18,64506876 | -0,4646636  | 0,402104497 | -1,15557922 | 0,247853311 | 0,304814004 |
| gir_mul_arrrb-2     | 14,06093963 | -0,31721891 | 0,29622315  | -1,0708782  | 0,284224199 | 0,342956816 |
| gir_mul_nanos       | 1,413659868 | 0,738983465 | 0,697688642 | 1,059188039 | 0,289514151 | 0,347846561 |
| gir_mul_09720       | 20,8589135  | 0,442764058 | 0,421671322 | 1,050021745 | 0,293708115 | 0,352433571 |
| gir_mul_sp6-9       | 1,904180298 | 0,665553847 | 0,634102348 | 1,049600036 | 0,293902041 | 0,352433571 |
| gir_mul_transferrin | 7,708050824 | -0,49154523 | 0,480227789 | -1,02356683 | 0,30603992  | 0,364852706 |
| gir_mul_ovo         | 12,4118609  | 0,460262208 | 0,472848371 | 0,973382245 | 0,33036336  | 0,389176133 |
| gir_mul_17028       | 32,85256184 | -0,24404153 | 0,338691618 | -0,720542   | 0,471191352 | 0,529918052 |
| gir_mul_16656       | 34,60349914 | 0,177194566 | 0,24684631  | 0,717833563 | 0,472859916 | 0,531406122 |
| gir_mul_best-a      | 6,579655722 | -0,34905739 | 0,53848918  | -0,64821616 | 0,516845152 | 0,57474974  |
| gir_mul_33093       | 192,8966793 | 0,127391413 | 0,19667144  | 0,647737227 | 0,517154922 | 0,574886451 |



|                 |             |             |             |             |             |             |
|-----------------|-------------|-------------|-------------|-------------|-------------|-------------|
| gir_mul_5ht-r1  | 63,58226533 | -0,13458633 | 0,209946862 | -0,64104948 | 0,521490535 | 0,578660791 |
| gir_mul_ddryk   | 60,75644    | 0,146802669 | 0,239979872 | 0,61172909  | 0,540717012 | 0,596204461 |
| gir_mul_qdr     | 57,88020723 | 0,12973308  | 0,225757031 | 0,574657982 | 0,56552263  | 0,619698409 |
| gir_mul_gpcrP-2 | 20,41821615 | -0,15823432 | 0,28912074  | -0,54729493 | 0,584176124 | 0,638547046 |
| gir_mul_10538   | 15,43580697 | 0,220280651 | 0,404650534 | 0,544372569 | 0,586185118 | 0,640288111 |
| gir_mul_fzdP-2  | 305,7269366 | -0,10513853 | 0,21509064  | -0,48881033 | 0,624975986 | 0,67570313  |
| gir_mul_sans    | 8,796515637 | 0,175937176 | 0,403266412 | 0,436280262 | 0,662633401 | 0,710921539 |
| gir_mul_09132   | 30,28785372 | -0,11960868 | 0,336194662 | -0,3557721  | 0,722011243 | 0,764760274 |
| gir_mul_34512   | 34,61451993 | -0,07684766 | 0,25876859  | -0,29697447 | 0,766486001 | 0,803296126 |
| gir_mul_13405   | 146,0215749 | 0,077483619 | 0,334846743 | 0,231400246 | 0,817003874 | 0,84720609  |
| gir_mul_25626   | 356,8799567 | 0,058269068 | 0,267928829 | 0,217479651 | 0,827834564 | 0,855929755 |
| gir_mul_egfr-1  | 42,92531004 | 0,050614483 | 0,313488895 | 0,161455425 | 0,871734717 | 0,892027843 |

**Table S3d. Results of the differential gene expression analysis in planarian eye-related gene orthologs. DESeq2 Wald test pair-wise comparison between *S. mediterranea* and *G. multidiverticulata* morphotypes.**

| <b><i>S. mediterranea</i> and <i>G. multidiverticulata</i> non-discernible eyes:</b> |             |                   |             |             |          |          |
|--------------------------------------------------------------------------------------|-------------|-------------------|-------------|-------------|----------|----------|
| gene                                                                                 | baseMean    | log2FoldChanlfcSE | stat        | pvalue      | padj     |          |
| gir_mul_tph                                                                          | 160,5051455 | 5,168691807       | 0,294275196 | 17,5641436  | 4,64E-69 | 1,10E-66 |
| gir_mul_gucy-2                                                                       | 34,62219212 | 4,212564535       | 0,33483757  | 12,58091957 | 2,69E-36 | 9,29E-35 |
| gir_mul_27566                                                                        | 31,2076629  | -3,40955438       | 0,274977904 | -12,3993758 | 2,63E-35 | 8,26E-34 |
| gir_mul_05359                                                                        | 162,4782955 | 2,46992568        | 0,204900858 | 12,05424763 | 1,84E-33 | 5,10E-32 |
| gir_mul_32930                                                                        | 148,5210231 | 2,890321249       | 0,240246891 | 12,03062914 | 2,45E-33 | 6,73E-32 |
| gir_mul_cdkl1                                                                        | 47,0438357  | 3,178460993       | 0,265099415 | 11,98969446 | 4,02E-33 | 1,09E-31 |
| gir_mul_03464                                                                        | 40,36163341 | 3,354520829       | 0,282150866 | 11,88910345 | 1,35E-32 | 3,45E-31 |
| gir_mul_cng                                                                          | 24,54991028 | 3,365038001       | 0,295840947 | 11,37448362 | 5,60E-30 | 1,19E-28 |
| gir_mul_arrestin                                                                     | 1089,769735 | 4,413194945       | 0,391922952 | 11,26036361 | 2,06E-29 | 3,98E-28 |
| gir_mul_32281                                                                        | 307,0345569 | -2,66821337       | 0,240572055 | -11,0911193 | 1,39E-28 | 2,54E-27 |
| gir_mul_21613                                                                        | 501,7610087 | 2,110780558       | 0,191995827 | 10,9938877  | 4,09E-28 | 7,10E-27 |
| gir_mul_cgs-pde                                                                      | 61,29908946 | 2,399471674       | 0,22028629  | 10,89251482 | 1,25E-27 | 2,13E-26 |
| gir_mul_inpp5                                                                        | 34,84962821 | -2,79615797       | 0,264196396 | -10,5836341 | 3,55E-26 | 5,37E-25 |
| gir_mul_cds                                                                          | 34,70080418 | -3,01509602       | 0,287062134 | -10,5032871 | 8,34E-26 | 1,24E-24 |
| gir_mul_pitp                                                                         | 154,643176  | 3,930825301       | 0,375420596 | 10,47045725 | 1,18E-25 | 1,71E-24 |
| gir_mul_ninag                                                                        | 23,25559959 | 4,274513166       | 0,410420323 | 10,41496468 | 2,12E-25 | 3,00E-24 |
| gir_mul_07503                                                                        | 34,26826942 | -2,10138442       | 0,202284709 | -10,3882514 | 2,80E-25 | 3,92E-24 |
| gir_mul_ip3k                                                                         | 133,9943897 | 2,723552591       | 0,264105265 | 10,31237524 | 6,20E-25 | 8,39E-24 |
| gir_mul_32587                                                                        | 35,46114122 | 2,652911616       | 0,264042615 | 10,0472858  | 9,44E-24 | 1,18E-22 |
| gir_mul_01915                                                                        | 137,2861893 | 1,46111606        | 0,146053187 | 10,00399986 | 1,46E-23 | 1,80E-22 |
| gir_mul_29449                                                                        | 37,88623784 | 2,892883833       | 0,290231075 | 9,96751928  | 2,11E-23 | 2,59E-22 |
| gir_mul_59sley                                                                       | 23,05010016 | 3,020343837       | 0,303326846 | 9,957390437 | 2,34E-23 | 2,86E-22 |
| gir_mul_tyrosinase                                                                   | 45,4866119  | 2,813813493       | 0,28352878  | 9,924260575 | 3,27E-23 | 3,94E-22 |
| gir_mul_trpc-2                                                                       | 149,9486044 | 2,357835017       | 0,243330366 | 9,689851095 | 3,33E-22 | 3,71E-21 |
| gir_mul_09627                                                                        | 112,8298692 | 1,773435495       | 0,191446238 | 9,263360372 | 1,98E-20 | 1,95E-19 |
| gir_mul_03129                                                                        | 79,00076723 | 2,097165787       | 0,22691521  | 9,242067927 | 2,42E-20 | 2,34E-19 |
| gir_mul_cpo                                                                          | 15,62878459 | 4,683264668       | 0,507893296 | 9,220961778 | 2,94E-20 | 2,84E-19 |
| gir_mul_09132                                                                        | 34,80097313 | 1,929458075       | 0,210890208 | 9,149111742 | 5,74E-20 | 5,36E-19 |
| gir_mul_rops2                                                                        | 95,6723593  | 1,988088554       | 0,225715615 | 8,807935375 | 1,27E-18 | 1,07E-17 |
| gir_mul_22239                                                                        | 23,09035405 | 3,292010719       | 0,381777496 | 8,622851664 | 6,53E-18 | 5,17E-17 |
| gir_mul_eya                                                                          | 39,92807652 | 1,91706319        | 0,227943231 | 8,410265918 | 4,09E-17 | 3,08E-16 |
| gir_mul_5ht-r1                                                                       | 90,17535878 | 2,347345611       | 0,285926181 | 8,209621122 | 2,22E-16 | 1,55E-15 |
| gir_mul_22592                                                                        | 9,897723271 | 3,571501619       | 0,447342713 | 7,98381536  | 1,42E-15 | 9,22E-15 |
| gir_mul_12518                                                                        | 29,85790588 | 2,954971071       | 0,372763544 | 7,92719974  | 2,24E-15 | 1,42E-14 |
| gir_mul_09720                                                                        | 49,34489233 | 2,647231664       | 0,343419082 | 7,708458271 | 1,27E-14 | 7,56E-14 |
| gir_mul_plcb                                                                         | 135,7058773 | 3,254529527       | 0,426261415 | 7,635055428 | 2,26E-14 | 1,32E-13 |
| gir_mul_best-b                                                                       | 8,776559563 | 3,61042658        | 0,485029074 | 7,443732287 | 9,79E-14 | 5,46E-13 |
| gir_mul_5ht-r2                                                                       | 7,783570665 | 3,601174585       | 0,49409693  | 7,288397006 | 3,14E-13 | 1,67E-12 |
| gir_mul_02471                                                                        | 60,63689358 | 2,288660401       | 0,314934884 | 7,267090816 | 3,67E-13 | 1,94E-12 |
| gir_mul_28813                                                                        | 39,31578523 | 2,401706992       | 0,360993575 | 6,65304636  | 2,87E-11 | 1,28E-10 |
| gir_mul_34512                                                                        | 37,46352164 | 1,504551667       | 0,232125041 | 6,481643098 | 9,07E-11 | 3,82E-10 |

|                   |             |             |             |             |             |             |
|-------------------|-------------|-------------|-------------|-------------|-------------|-------------|
| gir_mul_pctaire   | 40,33902431 | 1,598685681 | 0,254287778 | 6,286915136 | 3,24E-10    | 1,29E-09    |
| gir_mul_nhe-rf    | 34,29791994 | -1,22471194 | 0,204758168 | -5,98126052 | 2,21E-09    | 8,08E-09    |
| gir_mul_gpcrP-2   | 29,2011705  | 1,76271386  | 0,3046742   | 5,785569835 | 7,23E-09    | 2,49E-08    |
| gir_mul_soxB      | 33,58091706 | 1,806746081 | 0,312973566 | 5,772839235 | 7,79E-09    | 2,68E-08    |
| gir_mul_19866     | 80,45362327 | -1,49091207 | 0,261534242 | -5,70063812 | 1,19E-08    | 4,04E-08    |
| gir_mul_20798     | 27,18244463 | -1,34295416 | 0,238531521 | -5,63009097 | 1,80E-08    | 5,97E-08    |
| gir_mul_eag       | 6,181397234 | 2,834440356 | 0,504701992 | 5,616067308 | 1,95E-08    | 6,47E-08    |
| gir_mul_16656     | 31,21746896 | 1,54044277  | 0,275639742 | 5,58860909  | 2,29E-08    | 7,54E-08    |
| gir_mul_04136     | 32,25622784 | 1,464627531 | 0,264567716 | 5,535926873 | 3,10E-08    | 1,00E-07    |
| gir_mul_nkx1      | 9,139119875 | 1,911541092 | 0,347864402 | 5,495075321 | 3,91E-08    | 1,24E-07    |
| gir_mul_26028     | 168,1196454 | -1,35260459 | 0,250528418 | -5,39900666 | 6,70E-08    | 2,09E-07    |
| gir_mul_06952     | 21,94838552 | -1,38911434 | 0,257913883 | -5,38596186 | 7,21E-08    | 2,24E-07    |
| gir_mul_10538     | 27,93333203 | 1,624446952 | 0,304331971 | 5,337746625 | 9,41E-08    | 2,88E-07    |
| gir_mul_pcdhP-4   | 110,1017327 | 1,613957896 | 0,302553528 | 5,33445406  | 9,58E-08    | 2,93E-07    |
| gir_mul_20488     | 62,41455928 | 1,291360988 | 0,2461692   | 5,245826804 | 1,56E-07    | 4,67E-07    |
| gir_mul_six-1-2   | 57,82340508 | 1,79922326  | 0,347895803 | 5,171730278 | 2,32E-07    | 6,80E-07    |
| gir_mul_pde1c     | 49,05310073 | 1,424192973 | 0,275540562 | 5,16872349  | 2,36E-07    | 6,90E-07    |
| gir_mul_pmca2     | 46,75372919 | 1,27420213  | 0,250631662 | 5,083963133 | 3,70E-07    | 1,06E-06    |
| gir_mul_egfr-1    | 68,14412826 | 1,311730418 | 0,263582944 | 4,976537555 | 6,47E-07    | 1,80E-06    |
| gir_mul_nanos     | 5,758371681 | 1,953101169 | 0,408727983 | 4,778486553 | 1,77E-06    | 4,66E-06    |
| gir_mul_dagk      | 84,61761052 | 1,133114993 | 0,237939285 | 4,762202222 | 1,91E-06    | 5,00E-06    |
| gir_mul_04256     | 49,03530393 | 1,54915127  | 0,331541582 | 4,672570056 | 2,97E-06    | 7,62E-06    |
| gir_mul_arrb-2    | 18,03134083 | 1,450756061 | 0,319290879 | 4,54368151  | 5,53E-06    | 1,36E-05    |
| gir_mul_ncx       | 252,779661  | 0,871148363 | 0,199833852 | 4,359363319 | 1,30E-05    | 3,08E-05    |
| gir_mul_ddc       | 25,594359   | 1,516921103 | 0,353112466 | 4,295858254 | 1,74E-05    | 4,05E-05    |
| gir_mul_23388     | 144,5315822 | 0,767457292 | 0,184513578 | 4,15935402  | 3,19E-05    | 7,18E-05    |
| gir_mul_13405     | 131,0006011 | 1,284903965 | 0,310692178 | 4,135617365 | 3,54E-05    | 7,90E-05    |
| gir_mul_crf-r     | 8,835699113 | -1,63239695 | 0,397029183 | -4,11152889 | 3,93E-05    | 8,75E-05    |
| gir_mul_dlx       | 26,5740909  | 1,055661313 | 0,264655622 | 3,988811221 | 6,64E-05    | 0,000143148 |
| gir_mul_best-a    | 15,01480941 | 1,507451796 | 0,37938687  | 3,973389472 | 7,09E-05    | 0,000151999 |
| gir_mul_foxq2     | 20,44355554 | 1,447495079 | 0,371860198 | 3,892578675 | 9,92E-05    | 0,000208974 |
| gir_mul_23489     | 42,17217341 | 0,69603012  | 0,179252618 | 3,882956516 | 0,000103194 | 0,000216947 |
| gir_mul_25626     | 255,0223998 | 0,964615853 | 0,254425983 | 3,791341758 | 0,000149836 | 0,000307268 |
| gir_mul_otxA      | 20,5972394  | 0,916471365 | 0,244799215 | 3,743767581 | 0,000181281 | 0,000367101 |
| gir_mul_07357     | 89,67611899 | 0,624625215 | 0,167184516 | 3,736142728 | 0,000186865 | 0,000378158 |
| gir_mul_29424     | 211,3971519 | 0,716925033 | 0,192379526 | 3,726618149 | 0,000194066 | 0,000392215 |
| gir_mul_sp6-9     | 4,672186398 | 1,677727251 | 0,451234294 | 3,71808454  | 0,000200739 | 0,000404107 |
| gir_mul_cdh23     | 36,1148872  | 1,283132251 | 0,357533879 | 3,588841017 | 0,000332151 | 0,000654928 |
| gir_mul_ddryk     | 49,50019191 | 1,036883492 | 0,293490148 | 3,532941388 | 0,000410964 | 0,000798547 |
| gir_mul_34343     | 46,0129499  | 1,298303127 | 0,372142119 | 3,488729338 | 0,000485322 | 0,000934762 |
| gir_mul_31312     | 4,117957186 | 1,753550943 | 0,510848147 | 3,432626612 | 0,000597765 | 0,001139906 |
| gir_mul_smad6-7-2 | 121,1916408 | 1,226348723 | 0,359473729 | 3,411511397 | 0,000646038 | 0,001225877 |
| gir_mul_hcng      | 44,6512591  | 1,028827585 | 0,319428405 | 3,220839376 | 0,001278158 | 0,002323511 |
| gir_mul_pis       | 26,65545988 | 0,63849477  | 0,204014015 | 3,129661307 | 0,00175008  | 0,003138707 |
| gir_mul_stim      | 67,54606378 | -0,43887867 | 0,147055034 | -2,98445187 | 0,002840869 | 0,004950584 |
| gir_mul_11992     | 24,95121575 | 0,761271341 | 0,263943536 | 2,884220436 | 0,00392384  | 0,006675088 |

|                     |             |             |             |             |             |             |
|---------------------|-------------|-------------|-------------|-------------|-------------|-------------|
| gir_mul_myoVI       | 165,5970819 | 0,719397142 | 0,266037495 | 2,704119362 | 0,006848568 | 0,011186238 |
| gir_mul_21691       | 90,42802905 | -0,7868684  | 0,293475555 | -2,68120595 | 0,007335735 | 0,011912335 |
| gir_mul_26962       | 152,1580085 | -0,50558434 | 0,197492323 | -2,56002024 | 0,010466607 | 0,016513568 |
| gir_mul_04906       | 54,89055869 | 0,719703085 | 0,281209384 | 2,559313897 | 0,010487899 | 0,016533232 |
| gir_mul_34307       | 6,211437003 | 0,860899497 | 0,336526727 | 2,558190563 | 0,010521842 | 0,016578237 |
| gir_mul_08086       | 129,8473167 | 0,427604904 | 0,171950958 | 2,486784079 | 0,012890361 | 0,020077047 |
| gir_mul_qdr         | 105,1138436 | -0,8758954  | 0,353982149 | -2,47440558 | 0,013345809 | 0,020751147 |
| gir_mul_unc5-2      | 124,3982799 | 0,523791735 | 0,218372027 | 2,398621029 | 0,016456937 | 0,025243824 |
| gir_mul_17151       | 26,52346326 | 0,598977596 | 0,262713446 | 2,279965512 | 0,022609734 | 0,033757048 |
| gir_mul_33093       | 106,6545212 | -0,63222098 | 0,278575463 | -2,26947835 | 0,023239252 | 0,034628635 |
| gir_mul_ip3r        | 35,75330137 | 0,720531522 | 0,33159718  | 2,172912094 | 0,029786934 | 0,043581645 |
| gir_mul_myoVIIA     | 304,0309401 | -0,66328572 | 0,314799121 | -2,10701263 | 0,035116485 | 0,050870912 |
| gir_mul_10513       | 91,40087182 | -0,36012779 | 0,171043716 | -2,10547218 | 0,035250227 | 0,051040601 |
| gir_mul_12199       | 141,3034913 | 0,483962328 | 0,237251203 | 2,039873021 | 0,041362974 | 0,059304936 |
| gir_mul_atp13       | 101,7029333 | 0,676346441 | 0,355629113 | 1,901830917 | 0,057193263 | 0,0793018   |
| gir_mul_27330       | 57,56703642 | 0,349159195 | 0,184998549 | 1,887361807 | 0,059111678 | 0,081887922 |
| gir_mul_08883       | 51,90637981 | -0,37492019 | 0,207322149 | -1,80839427 | 0,070545159 | 0,096252029 |
| gir_mul_ovo         | 11,39712534 | 0,501913905 | 0,326702162 | 1,536304207 | 0,124463788 | 0,163413756 |
| gir_mul_klf         | 6,833680027 | 0,743752055 | 0,486065251 | 1,530148584 | 0,125979955 | 0,165143872 |
| gir_mul_09268       | 77,9508774  | -0,31140346 | 0,208036489 | -1,49686944 | 0,134427233 | 0,17524568  |
| gir_mul_nol1        | 4,320178123 | -0,63499302 | 0,428428454 | -1,48214484 | 0,138301759 | 0,179991366 |
| gir_mul_gna-o       | 83,74926584 | 0,442962804 | 0,306523177 | 1,445120099 | 0,148424154 | 0,19186537  |
| gir_mul_maguk       | 296,9814284 | 0,290728176 | 0,205256942 | 1,416410931 | 0,156655225 | 0,201404501 |
| gir_mul_17028       | 18,0032529  | 0,398098784 | 0,334132794 | 1,191438826 | 0,233481358 | 0,288241645 |
| gir_mul_rgs6-7-9    | 287,3217337 | -0,22364712 | 0,188612679 | -1,18574807 | 0,235721806 | 0,290774009 |
| gir_mul_fzdP-1      | 64,14077763 | 0,310124046 | 0,267553558 | 1,159110153 | 0,246411288 | 0,302382554 |
| gir_mul_nf-i-a      | 50,7070918  | 0,226200653 | 0,204528542 | 1,105961303 | 0,268743269 | 0,327304599 |
| gir_mul_erm         | 9,363064918 | -0,43279991 | 0,393358912 | -1,10026721 | 0,271215714 | 0,329793159 |
| gir_mul_ttbk        | 48,68441411 | 0,318146597 | 0,29065305  | 1,094592322 | 0,273695281 | 0,332545175 |
| gir_mul_transferrin | 5,861977056 | 0,426165888 | 0,437672106 | 0,973710415 | 0,330200344 | 0,390849387 |
| gir_mul_robo-c      | 173,4001642 | -0,23764822 | 0,252059755 | -0,94282494 | 0,345770453 | 0,407709388 |
| gir_mul_sk3         | 44,30255552 | 0,202139107 | 0,222976354 | 0,906549523 | 0,364645065 | 0,427342329 |
| gir_mul_07486       | 7,340078855 | -0,3810517  | 0,43295163  | -0,88012534 | 0,378791411 | 0,441899354 |
| gir_mul_23244       | 54,83140576 | -0,14851074 | 0,185040643 | -0,80258445 | 0,422214958 | 0,485736819 |
| gir_mul_gpcrP-1     | 14,42566859 | 0,223547274 | 0,279097326 | 0,800965301 | 0,423151734 | 0,486632409 |
| gir_mul_00978       | 134,586185  | -0,16034328 | 0,206606211 | -0,7760816  | 0,437700806 | 0,501487991 |
| gir_mul_gna-q       | 129,2448215 | -0,30070854 | 0,394658839 | -0,76194555 | 0,446092504 | 0,5099622   |
| gir_mul_01362       | 26,91273606 | -0,19416852 | 0,263928688 | -0,73568555 | 0,461922088 | 0,526687128 |
| gir_mul_meis        | 26,01743223 | -0,16537439 | 0,225585687 | -0,73308904 | 0,463504124 | 0,528295023 |
| gir_mul_13049       | 123,5418277 | 0,183030092 | 0,264570758 | 0,691800159 | 0,489062837 | 0,553119632 |
| gir_mul_gls         | 7,96530562  | 0,295854159 | 0,440404362 | 0,671778449 | 0,501724751 | 0,565070429 |
| gir_mul_unc5-1      | 118,0401257 | -0,22199925 | 0,331973353 | -0,66872611 | 0,50367021  | 0,566306593 |
| gir_mul_15984       | 91,4736461  | 0,12069587  | 0,188142235 | 0,641513959 | 0,521188815 | 0,584294098 |
| gir_mul_30263       | 18,31524906 | -0,19070344 | 0,300480398 | -0,63466183 | 0,525648992 | 0,588422982 |
| gir_mul_09274       | 52,04442327 | 0,195185995 | 0,322427911 | 0,60536321  | 0,54493769  | 0,606714401 |
| gir_mul_03496       | 142,7988525 | 0,12130251  | 0,269468506 | 0,450154684 | 0,652598909 | 0,710120016 |

|                |             |             |             |             |             |             |
|----------------|-------------|-------------|-------------|-------------|-------------|-------------|
| gir_mul_20047  | 105,0681294 | 0,120005425 | 0,278469085 | 0,430947029 | 0,666506887 | 0,721169367 |
| gir_mul_08711  | 38,70318543 | 0,155725829 | 0,377199758 | 0,412847107 | 0,679718636 | 0,734430611 |
| gir_mul_23802  | 2,232417663 | 0,202179379 | 0,519359719 | 0,38928583  | 0,697064717 | 0,750272038 |
| gir_mul_abl    | 82,07429233 | -0,10402884 | 0,274203461 | -0,37938559 | 0,70440155  | 0,755318447 |
| gir_mul_fzdP-2 | 270,2229196 | -0,09312729 | 0,245764901 | -0,37892837 | 0,704741058 | 0,755360535 |
| gir_mul_14918  | 41,73205941 | 0,061158236 | 0,26871408  | 0,227595949 | 0,81996037  | 0,85674989  |
| gir_mul_sans   | 8,716324934 | 0,043964259 | 0,394913153 | 0,111326397 | 0,911357523 | 0,931044542 |

***S. mediterranea* and *G. multidiverticulata* discernible eyes:**

| gene             | baseMean    | log2FoldChanlfcSE | stat        | pvalue      | padj     |          |
|------------------|-------------|-------------------|-------------|-------------|----------|----------|
| gir_mul_32281    | 598,4310581 | -3,58711283       | 0,249123777 | -14,398918  | 5,26E-47 | 2,21E-45 |
| gir_mul_inpp5    | 48,59188909 | -3,16671892       | 0,235196309 | -13,4641523 | 2,54E-41 | 7,97E-40 |
| gir_mul_tph      | 180,5364379 | 4,315735263       | 0,321478828 | 13,42463296 | 4,34E-41 | 1,33E-39 |
| gir_mul_28813    | 39,71641957 | 3,341830583       | 0,252196931 | 13,2508773  | 4,46E-40 | 1,31E-38 |
| gir_mul_gucy-2   | 40,1194552  | 3,27901864        | 0,25329292  | 12,94555981 | 2,49E-38 | 6,43E-37 |
| gir_mul_05359    | 176,6437319 | 2,572161712       | 0,225207194 | 11,42131235 | 3,27E-30 | 5,32E-29 |
| gir_mul_ip3k     | 154,6516458 | 2,305646919       | 0,204619127 | 11,26799313 | 1,89E-29 | 2,87E-28 |
| gir_mul_cds      | 40,51221409 | -3,11768528       | 0,277826796 | -11,2216868 | 3,19E-29 | 4,74E-28 |
| gir_mul_07503    | 39,36826819 | -2,15779712       | 0,19402319  | -11,1213361 | 9,88E-29 | 1,43E-27 |
| gir_mul_arrestin | 1219,401977 | 3,866589723       | 0,362383755 | 10,66987599 | 1,41E-26 | 1,83E-25 |
| gir_mul_03464    | 46,99637376 | 2,564225809       | 0,253819396 | 10,10256052 | 5,38E-24 | 5,87E-23 |
| gir_mul_cng      | 27,2142945  | 3,149194393       | 0,312808708 | 10,06747674 | 7,69E-24 | 8,27E-23 |
| gir_mul_27566    | 22,74058915 | -2,74759694       | 0,274514482 | -10,0089326 | 1,39E-23 | 1,47E-22 |
| gir_mul_01915    | 155,4609965 | 1,314703516       | 0,132129758 | 9,950094034 | 2,52E-23 | 2,58E-22 |
| gir_mul_pitp     | 180,0827393 | 3,032991936       | 0,311654271 | 9,731911991 | 2,20E-22 | 2,14E-21 |
| gir_mul_plcb     | 155,0441051 | 2,791593567       | 0,289470302 | 9,64379953  | 5,22E-22 | 4,92E-21 |
| gir_mul_cpo      | 17,29034892 | 3,928458224       | 0,417380586 | 9,412172852 | 4,86E-21 | 4,39E-20 |
| gir_mul_32930    | 180,4307729 | 1,983943952       | 0,219118687 | 9,0541979   | 1,38E-19 | 1,10E-18 |
| gir_mul_trpc-2   | 171,1631193 | 2,039640436       | 0,226535226 | 9,003634769 | 2,18E-19 | 1,72E-18 |
| gir_mul_32587    | 42,60407961 | 1,870356198       | 0,210191303 | 8,898351963 | 5,67E-19 | 4,30E-18 |
| gir_mul_03129    | 91,33373814 | 1,696187008       | 0,198028285 | 8,565377465 | 1,08E-17 | 7,25E-17 |
| gir_mul_22592    | 10,476043   | 3,437552535       | 0,405064243 | 8,486437888 | 2,13E-17 | 1,40E-16 |
| gir_mul_02471    | 65,15145919 | 2,510264763       | 0,298306044 | 8,415065036 | 3,93E-17 | 2,51E-16 |
| gir_mul_ninag    | 26,34313799 | 3,494530778       | 0,417313461 | 8,373875054 | 5,58E-17 | 3,53E-16 |
| gir_mul_22239    | 27,17461788 | 2,557531829       | 0,309936901 | 8,251782284 | 1,56E-16 | 9,46E-16 |
| gir_mul_rops2    | 105,9456439 | 1,98921009        | 0,247105785 | 8,050034469 | 8,28E-16 | 4,76E-15 |
| gir_mul_cdkl1    | 56,25077515 | 2,256276547       | 0,281728263 | 8,008697901 | 1,16E-15 | 6,55E-15 |
| gir_mul_26028    | 218,446794  | -1,66647494       | 0,228164079 | -7,30384444 | 2,80E-13 | 1,36E-12 |
| gir_mul_29449    | 46,95998175 | 1,797353617       | 0,258621477 | 6,949746164 | 3,66E-12 | 1,63E-11 |
| gir_mul_eya      | 49,22047744 | 1,243062735       | 0,180850957 | 6,873409782 | 6,27E-12 | 2,74E-11 |
| gir_mul_21691    | 123,6667526 | -1,25057788       | 0,186191611 | -6,71661773 | 1,86E-11 | 7,78E-11 |
| gir_mul_cgs-pde  | 80,83611096 | 1,268967496       | 0,19043059  | 6,663674666 | 2,67E-11 | 1,11E-10 |
| gir_mul_best-a   | 14,99232324 | 2,222070983       | 0,334459468 | 6,643767625 | 3,06E-11 | 1,26E-10 |
| gir_mul_09627    | 134,2536795 | 1,318759561       | 0,200465329 | 6,578492002 | 4,75E-11 | 1,92E-10 |
| gir_mul_best-b   | 10,65550774 | 2,492616533       | 0,381268456 | 6,537694098 | 6,25E-11 | 2,51E-10 |
| gir_mul_21613    | 606,9636282 | 1,506971872       | 0,234703904 | 6,420736293 | 1,36E-10 | 5,29E-10 |

|                  |             |             |             |             |             |             |
|------------------|-------------|-------------|-------------|-------------|-------------|-------------|
| gir_mul_5ht-r2   | 9,594056957 | 2,332000401 | 0,363876308 | 6,408772296 | 1,47E-10    | 5,70E-10    |
| gir_mul_nanos    | 5,643734323 | 2,953092583 | 0,46102773  | 6,405455446 | 1,50E-10    | 5,82E-10    |
| gir_mul_stim     | 85,48408376 | -0,79231876 | 0,123749135 | -6,40262059 | 1,53E-10    | 5,91E-10    |
| gir_mul_59sley   | 29,83014045 | 1,606904249 | 0,258686369 | 6,211785551 | 5,24E-10    | 1,93E-09    |
| gir_mul_26962    | 218,8724419 | -1,11154178 | 0,199291578 | -5,57746489 | 2,44E-08    | 7,69E-08    |
| gir_mul_09720    | 59,11569349 | 1,923537069 | 0,345687572 | 5,564380159 | 2,63E-08    | 8,24E-08    |
| gir_mul_5ht-r1   | 115,2845869 | 1,385547654 | 0,253188452 | 5,47239671  | 4,44E-08    | 1,36E-07    |
| gir_mul_10538    | 31,41730386 | 1,475491244 | 0,269959545 | 5,465601307 | 4,61E-08    | 1,40E-07    |
| gir_mul_nhe-rf   | 31,67907171 | -0,88489192 | 0,161939745 | -5,46432821 | 4,65E-08    | 1,41E-07    |
| gir_mul_06952    | 21,86710388 | -1,20848865 | 0,221531452 | -5,4551561  | 4,89E-08    | 1,48E-07    |
| gir_mul_33093    | 154,7906008 | -1,23909557 | 0,227561151 | -5,44511032 | 5,18E-08    | 1,56E-07    |
| gir_mul_gpcrP-2  | 33,78783545 | 1,273151247 | 0,238910671 | 5,328984429 | 9,88E-08    | 2,90E-07    |
| gir_mul_six-1-2  | 67,20604741 | 1,5040641   | 0,28945886  | 5,196123895 | 2,03E-07    | 5,77E-07    |
| gir_mul_08711    | 26,72871992 | 1,943761616 | 0,374273522 | 5,193425397 | 2,06E-07    | 5,84E-07    |
| gir_mul_dagk     | 96,54156742 | 0,980776148 | 0,191054603 | 5,133486106 | 2,84E-07    | 7,90E-07    |
| gir_mul_pctaire  | 50,12166527 | 0,941435037 | 0,184786044 | 5,094730199 | 3,49E-07    | 9,56E-07    |
| gir_mul_04256    | 53,29613955 | 1,631259653 | 0,320244882 | 5,093788359 | 3,51E-07    | 9,59E-07    |
| gir_mul_12518    | 37,15674776 | 1,813238835 | 0,357787882 | 5,067915727 | 4,02E-07    | 1,10E-06    |
| gir_mul_eag      | 7,646046051 | 1,681468287 | 0,341841438 | 4,918854474 | 8,71E-07    | 2,29E-06    |
| gir_mul_20798    | 23,57832236 | -0,89148189 | 0,183450321 | -4,85952755 | 1,18E-06    | 3,04E-06    |
| gir_mul_cdh23    | 36,58039101 | 1,710285381 | 0,358529285 | 4,770280851 | 1,84E-06    | 4,67E-06    |
| gir_mul_19866    | 76,79561764 | -1,22151662 | 0,260238695 | -4,69383163 | 2,68E-06    | 6,68E-06    |
| gir_mul_meis     | 36,5592134  | -0,77475492 | 0,168651417 | -4,59382398 | 4,35E-06    | 1,06E-05    |
| gir_mul_04136    | 42,26311419 | 0,719549788 | 0,157997835 | 4,554174984 | 5,26E-06    | 1,26E-05    |
| gir_mul_09268    | 106,6728498 | -0,82071123 | 0,185001523 | -4,43624041 | 9,15E-06    | 2,14E-05    |
| gir_mul_sp6-9    | 5,157939439 | 1,84350102  | 0,418992839 | 4,399838967 | 1,08E-05    | 2,51E-05    |
| gir_mul_egfr-1   | 76,37280148 | 1,270530878 | 0,292876898 | 4,338105493 | 1,44E-05    | 3,28E-05    |
| gir_mul_nkx1     | 10,96681254 | 1,317410361 | 0,316576845 | 4,161423626 | 3,16E-05    | 6,93E-05    |
| gir_mul_foxq2    | 23,76287645 | 1,228827556 | 0,299241528 | 4,106473997 | 4,02E-05    | 8,67E-05    |
| gir_mul_09132    | 45,08986362 | 1,033710864 | 0,25482316  | 4,05658129  | 4,98E-05    | 0,000106523 |
| gir_mul_crf-r    | 8,57443292  | -1,44907204 | 0,372590428 | -3,88918216 | 0,000100583 | 0,00020849  |
| gir_mul_dlx      | 30,25028837 | 0,886449891 | 0,230125599 | 3,852026439 | 0,000117144 | 0,000241193 |
| gir_mul_myoVI    | 170,7589507 | 0,985305462 | 0,257926967 | 3,820094788 | 0,0001334   | 0,000273018 |
| gir_mul_20488    | 75,25586849 | 0,854117859 | 0,231293973 | 3,692780444 | 0,000221816 | 0,00044162  |
| gir_mul_34512    | 46,94984114 | 0,786698942 | 0,214373596 | 3,669756714 | 0,000242781 | 0,00048149  |
| gir_mul_23388    | 165,5561636 | 0,618445296 | 0,170517357 | 3,626875921 | 0,000286871 | 0,000564198 |
| gir_mul_arrrb-2  | 20,83311998 | 1,078959868 | 0,299637466 | 3,600884372 | 0,000317137 | 0,000617402 |
| gir_mul_soxB     | 45,71267293 | 0,770209042 | 0,21583788  | 3,568460927 | 0,000359084 | 0,000692488 |
| gir_mul_ncx      | 298,795357  | 0,601895752 | 0,168702651 | 3,567790719 | 0,000360004 | 0,000693826 |
| gir_mul_34343    | 51,51057136 | 1,21015356  | 0,345036444 | 3,507320981 | 0,000452643 | 0,000859434 |
| gir_mul_20047    | 165,1661882 | -0,79101324 | 0,236607229 | -3,34314908 | 0,000828334 | 0,001518365 |
| gir_mul_10513    | 105,5394791 | -0,4850363  | 0,147655983 | -3,28490786 | 0,001020157 | 0,001846857 |
| gir_mul_rgs6-7-9 | 369,1755392 | -0,60541593 | 0,196150783 | -3,08648233 | 0,0020254   | 0,003491912 |
| gir_mul_13049    | 115,453371  | 0,70666717  | 0,232185811 | 3,043541587 | 0,002338111 | 0,003995194 |
| gir_mul_pis      | 30,76413145 | 0,5035529   | 0,177468107 | 2,837427574 | 0,004547866 | 0,007492037 |
| gir_mul_gls      | 6,76296143  | 1,003991999 | 0,369907099 | 2,714173372 | 0,006644138 | 0,01065975  |

|                    |             |             |             |             |             |             |
|--------------------|-------------|-------------|-------------|-------------|-------------|-------------|
| gir_mul_unc5-2     | 134,7105899 | 0,572700026 | 0,216362791 | 2,64694323  | 0,008122299 | 0,012850204 |
| gir_mul_gpcrP-1    | 22,98169272 | -0,74299585 | 0,285879363 | -2,59898387 | 0,009350017 | 0,014649312 |
| gir_mul_nf-i-a     | 71,71641373 | -0,4365149  | 0,169210541 | -2,57971457 | 0,009888201 | 0,01541396  |
| gir_mul_gna-o      | 125,287335  | -0,45326261 | 0,176339941 | -2,57039108 | 0,010158376 | 0,015811063 |
| gir_mul_otxA       | 24,95381608 | 0,519141157 | 0,202761123 | 2,560358461 | 0,010456425 | 0,016250278 |
| gir_mul_pcdhP-4    | 143,3232504 | 0,819222958 | 0,323095306 | 2,535545836 | 0,011227223 | 0,017404178 |
| gir_mul_atp13      | 110,0876771 | 0,743833874 | 0,296533629 | 2,508430079 | 0,012126897 | 0,018704506 |
| gir_mul_pde1c      | 64,15482645 | 0,602718968 | 0,244694395 | 2,463149876 | 0,013772233 | 0,021104609 |
| gir_mul_robo-c     | 204,8522226 | -0,42229491 | 0,175924591 | -2,40043136 | 0,016375762 | 0,024760989 |
| gir_mul_smad6-7-2  | 153,1902925 | 0,671217747 | 0,280569645 | 2,392339153 | 0,016741364 | 0,025251695 |
| gir_mul_15984      | 125,5030651 | -0,46706875 | 0,196285392 | -2,37953902 | 0,017334307 | 0,026043823 |
| gir_mul_abl        | 107,62912   | -0,55251569 | 0,232356772 | -2,37787644 | 0,01741266  | 0,026148762 |
| gir_mul_23489      | 51,85948583 | 0,390221034 | 0,169559475 | 2,301381465 | 0,021370079 | 0,031537024 |
| gir_mul_01362      | 33,60860698 | -0,5383359  | 0,23913892  | -2,25114299 | 0,024376482 | 0,035614689 |
| gir_mul_12199      | 212,7282621 | -0,41072224 | 0,182896231 | -2,24565723 | 0,024725972 | 0,036056754 |
| gir_mul_klf        | 7,544320545 | 0,845774182 | 0,388392534 | 2,177627294 | 0,029433796 | 0,042538547 |
| gir_mul_hcng       | 55,25547466 | 0,522300903 | 0,249034107 | 2,09730671  | 0,035966433 | 0,05109095  |
| gir_mul_pmca2      | 61,36762939 | 0,562053954 | 0,272040447 | 2,0660676   | 0,038822097 | 0,054893802 |
| gir_mul_ddc        | 34,75065836 | 0,669651637 | 0,330397737 | 2,026804548 | 0,042682405 | 0,05988394  |
| gir_mul_23244      | 64,73758393 | -0,31050278 | 0,155849615 | -1,99232308 | 0,046335621 | 0,06454499  |
| gir_mul_gna-q      | 160,4617879 | -0,60319471 | 0,308170529 | -1,95734068 | 0,050307428 | 0,069565917 |
| gir_mul_07486      | 5,299382149 | 0,714619787 | 0,373476246 | 1,913427677 | 0,055693324 | 0,076265735 |
| gir_mul_myoVIIA    | 315,0264142 | -0,51983973 | 0,271816368 | -1,91246662 | 0,05581637  | 0,076393376 |
| gir_mul_16656      | 45,1680505  | 0,393490423 | 0,208086145 | 1,890997704 | 0,058624651 | 0,079952163 |
| gir_mul_qdr        | 72,86599541 | 0,29827609  | 0,164905692 | 1,808767705 | 0,070487099 | 0,094796961 |
| gir_mul_23802      | 2,222907563 | 0,92408606  | 0,545904278 | 1,692762078 | 0,090500764 | 0,119296461 |
| gir_mul_11992      | 39,69416278 | -0,36942507 | 0,223260083 | -1,65468483 | 0,097988446 | 0,128286407 |
| gir_mul_maguk      | 411,1347156 | -0,35124924 | 0,216342864 | -1,62357674 | 0,104466172 | 0,136142607 |
| gir_mul_sk3        | 59,21709376 | -0,32745307 | 0,209860833 | -1,56033437 | 0,118680884 | 0,152902363 |
| gir_mul_14918      | 54,19433898 | -0,41233744 | 0,266279579 | -1,54851318 | 0,121498792 | 0,15614017  |
| gir_mul_fzdP-1     | 89,53965755 | -0,37041871 | 0,244088674 | -1,51755797 | 0,129125868 | 0,164976275 |
| gir_mul_17028      | 27,13839907 | -0,50672288 | 0,345337507 | -1,46732653 | 0,142287251 | 0,180367427 |
| gir_mul_ip3r       | 43,81250907 | 0,390008037 | 0,284357017 | 1,371543564 | 0,170205573 | 0,211569726 |
| gir_mul_erm        | 10,55513521 | -0,42443806 | 0,311750632 | -1,36146656 | 0,173366294 | 0,215237475 |
| gir_mul_13405      | 182,2836564 | 0,375765037 | 0,279968738 | 1,342167841 | 0,179541581 | 0,221857708 |
| gir_mul_nol1       | 4,601279158 | -0,56519912 | 0,461207723 | -1,22547627 | 0,220395827 | 0,26746813  |
| gir_mul_27330      | 77,46231814 | -0,22215562 | 0,188109558 | -1,18099058 | 0,237606464 | 0,286711716 |
| gir_mul_07357      | 109,7717902 | 0,202363286 | 0,178190191 | 1,135658951 | 0,256099327 | 0,306919817 |
| gir_mul_08883      | 53,15048942 | -0,19539698 | 0,184944396 | -1,05651745 | 0,290731875 | 0,34163218  |
| gir_mul_00978      | 145,918286  | -0,14027943 | 0,144472733 | -0,97097515 | 0,331560655 | 0,38475555  |
| gir_mul_tyrosinase | 80,20999349 | 0,363321856 | 0,3749215   | 0,96906114  | 0,332514685 | 0,385571536 |
| gir_mul_03496      | 152,8943132 | 0,196561598 | 0,228270109 | 0,861092147 | 0,389187294 | 0,445904488 |
| gir_mul_34307      | 8,117191642 | 0,242701555 | 0,299431483 | 0,810541202 | 0,417629195 | 0,474599684 |
| gir_mul_31312      | 6,404182967 | 0,3177472   | 0,397092867 | 0,800183601 | 0,42360443  | 0,480856727 |
| gir_mul_30263      | 20,04872448 | -0,17171912 | 0,258585209 | -0,6640717  | 0,506644424 | 0,561841616 |
| gir_mul_fzdP-2     | 300,6108598 | -0,13170606 | 0,211085481 | -0,62394657 | 0,532662677 | 0,587515274 |

|                     |             |             |             |             |             |             |
|---------------------|-------------|-------------|-------------|-------------|-------------|-------------|
| gir_mul_unc5-1      | 129,3279128 | -0,20755378 | 0,339350881 | -0,61161998 | 0,540789218 | 0,596264726 |
| gir_mul_08086       | 159,2969331 | 0,085769052 | 0,157369796 | 0,545015973 | 0,585742532 | 0,639407863 |
| gir_mul_ttbk        | 62,05214509 | -0,12814921 | 0,235825463 | -0,54340701 | 0,586849602 | 0,640388951 |
| gir_mul_ddryk       | 70,767236   | 0,143008463 | 0,269757374 | 0,530137361 | 0,596016697 | 0,648091732 |
| gir_mul_04906       | 72,48407011 | 0,103047009 | 0,257367492 | 0,400388598 | 0,688870321 | 0,732475741 |
| gir_mul_29424       | 283,6706717 | 0,081119195 | 0,219810989 | 0,369040672 | 0,712097409 | 0,753005654 |
| gir_mul_17151       | 33,54468827 | 0,091592117 | 0,274808549 | 0,33329428  | 0,738912157 | 0,775756821 |
| gir_mul_25626       | 382,0672517 | -0,05953974 | 0,230133524 | -0,25871825 | 0,795852635 | 0,825666892 |
| gir_mul_transferrin | 7,261241197 | 0,103932345 | 0,459706823 | 0,226083973 | 0,82113611  | 0,847891301 |
| gir_mul_sans        | 10,06292446 | -0,07355591 | 0,331379764 | -0,22196863 | 0,824338307 | 0,850340925 |
| gir_mul_ovo         | 15,00530907 | 0,07150524  | 0,340919655 | 0,209742204 | 0,833868884 | 0,859595221 |
| gir_mul_09274       | 60,0813642  | 0,037971931 | 0,250392452 | 0,151649663 | 0,879463261 | 0,898162812 |









**Table S5 - Probes used for In situ Hybridization Chain Reaction**

| pair                 | P1                        | P2                         | score | p1score | p2score | gene          | pool         | initiator | LEFT.SEQUENCE      | LEFT. SPACER | RIGHT. SEQUENCE    | RIGHT. SPACER | P1_seq                                                                               | P2_seq                                           |
|----------------------|---------------------------|----------------------------|-------|---------|---------|---------------|--------------|-----------|--------------------|--------------|--------------------|---------------|--------------------------------------------------------------------------------------|--------------------------------------------------|
| gd_3246_0_2_2_pair1  | AGGAAGTCTTGGCCAGGTTCTCGT  | TTGCTCTGGAAGCTGTGGATTGGCCG | 24,32 | 14,8    | 9,51    | gd_3246_0_2_2 | LS_HCR_gd B2 |           | CCTCGTAAATCTCATCA  | AA           | ATCATCCAGTAAACCGCC | AA            | CCTCGTAAATCTCATCAAAAGGAGTCTTGGCCAGGTTCTCGT                                           | TTGCTCTGGAAGCTGTGGATTGGCCAGTAAATCATCCAGTAAACCGCC |
| gd_3246_0_2_2_pair2  | CGCCCTCCCTTGGTGGTCTTCTCG  | CATGAGCAGTGTGATGGTGGTCCG   | 25,56 | 13,68   | 11,88   | gd_3246_0_2_2 | LS_HCR_gd B2 |           | CCTCGTAAATCTCATCA  | AA           | ATCATCCAGTAAACCGCC | AA            | CCTCGTAAATCTCATCAAAAGGAGTCTTGGCCAGGTTCTCGT                                           | CATGAGCAGTGTGATGGTGGTGGTAAATCATCCAGTAAACCGCC     |
| gd_3246_0_2_2_pair3  | TAATCGAGAACCGAGCCGCTGCAC  | AGCTGTGATCTGGGAGAACCTTGGC  | 25,74 | 11,5    | 14,24   | gd_3246_0_2_2 | LS_HCR_gd B2 |           | CCTCGTAAATCTCATCA  | AA           | ATCATCCAGTAAACCGCC | AA            | CCTCGTAAATCTCATCAAAATATCGAAGAACCGAGCCGCTGCACAGCTGATGTCTGGAGAACTCATCCAGTAAACCGCC      |                                                  |
| gd_3246_0_2_2_pair4  | CAAGTGAACACGGCCCTCGCGGATG | CACACAGAGAAACGACAAGACGGC   | 27,56 | 14,32   | 13,24   | gd_3246_0_2_2 | LS_HCR_gd B2 |           | CCTCGTAAATCTCATCA  | AA           | ATCATCCAGTAAACCGCC | AA            | CCTCGTAAATCTCATCAAAAGGAGTCTTGGCCAGGTTCTCGT                                           | CATGAGCAGTGTGATGGTGGTGGTAAATCATCCAGTAAACCGCC     |
| gd_3246_0_2_2_pair5  | TCGTCATGAATTCGGAGTCTGTGC  | GTGCTGTCAATGTTCAATCCCA     | 29,04 | 16,76   | 12,29   | gd_3246_0_2_2 | LS_HCR_gd B2 |           | CCTCGTAAATCTCATCA  | AA           | ATCATCCAGTAAACCGCC | AA            | CCTCGTAAATCTCATCAAAATGTCATGAATTCGGAGTCTGTGC                                          | GTGCTGTCAATGTTCAATCCCAAAATCATCCAGTAAACCGCC       |
| gd_3246_0_2_2_pair6  | GGCTGATCGCCTTCTGAGCATCAGC | GTTCGCCGCTCTTGAAGAAGCTG    | 29,13 | 14,71   | 14,43   | gd_3246_0_2_2 | LS_HCR_gd B2 |           | CCTCGTAAATCTCATCA  | AA           | ATCATCCAGTAAACCGCC | AA            | CCTCGTAAATCTCATCAAAAGCTGATGGCTTCTGACGATCAGC                                          | GTTCGCCGCTCTTGAAGAAGCTGAAATCATCCAGTAAACCGCC      |
| gd_3246_0_2_2_pair7  | GGACTTGTGGCCACCACTTCTGTG  | GGCAGCTAGAGAACATCTGCGATG   | 29,82 | 15,5    | 14,31   | gd_3246_0_2_2 | LS_HCR_gd B2 |           | CCTCGTAAATCTCATCA  | AA           | ATCATCCAGTAAACCGCC | AA            | CCTCGTAAATCTCATCAAAAGGACTTGTGGCCACCACTTCTGTG                                         | GGCAGCTAGAGAACATCTGCGATGAATCATCCAGTAAACCGCC      |
| gd_3246_0_2_2_pair8  | TTTGTCTGGGAGTAAACAGGAGA   | GGTGAAGTCTTGACCTGGCGTAG    | 30,47 | 13,02   | 17,48   | gd_3246_0_2_2 | LS_HCR_gd B2 |           | CCTCGTAAATCTCATCA  | AA           | ATCATCCAGTAAACCGCC | AA            | CCTCGTAAATCTCATCAAAATGTTGTGGGGGAGTAAACAGGAGTGAAGTCTTGACCTGGCTGAGAAATCATCCAGTAAACCGCC |                                                  |
| gd_3246_0_2_2_pair9  | AATCGATGAAGTCTGGTGGGCTCT  | CCCGCACAAATAACACAATCTCCG   | 30,8  | 14,54   | 16,26   | gd_3246_0_2_2 | LS_HCR_gd B2 |           | CCTCGTAAATCTCATCA  | AA           | ATCATCCAGTAAACCGCC | AA            | CCTCGTAAATCTCATCAAAAATCGTAGACTCTGGTGGGCTCT                                           | CCCGCACAAATAACACAATCTCCGAAATCATCCAGTAAACCGCC     |
| gd_3246_0_2_2_pair10 | GGCTGAGCGAGTACGTGATCTGCTG | TCGTGCCATCCGATGGAAGTAGAG   | 31,35 | 14,68   | 16,67   | gd_3246_0_2_2 | LS_HCR_gd B2 |           | CCTCGTAAATCTCATCA  | AA           | ATCATCCAGTAAACCGCC | AA            | CCTCGTAAATCTCATCAAAAGCTGAGGAGTACGTGATCTGCTGTGCCATCCGATGGAAGTAGAGAAATCATCCAGTAAACCGCC |                                                  |
| gd_3246_0_2_2_pair11 | AAGTCCGCTGTGAATGAGCGGATG  | GATTTTTGACACAGCGGTGTCAGGT  | 31,88 | 15,25   | 16,63   | gd_3246_0_2_2 | LS_HCR_gd B2 |           | CCTCGTAAATCTCATCA  | AA           | ATCATCCAGTAAACCGCC | AA            | CCTCGTAAATCTCATCAAAAAGTGGCGTGTGATGAGCGGATGATTTTTGACACAGCGGTGTCAGGATCATCCAGTAAACCGCC  |                                                  |
| gd_3246_0_2_2_pair12 | CCGTGCTTTAGGGATGTCGAATCT  | GCACACAGCACTCCGAAGCAGT     | 32,43 | 15,15   | 17,28   | gd_3246_0_2_2 | LS_HCR_gd B2 |           | CCTCGTAAATCTCATCA  | AA           | ATCATCCAGTAAACCGCC | AA            | CCTCGTAAATCTCATCAAAAGCTGCTTTAGGGATGTCGAATCT                                          | GCACACAGCACTCCGAAGCAGTGAATCATCCAGTAAACCGCC       |
| gd_3246_0_2_2_pair13 | CGCGTCTCTCTCAAACGGCTC     | AAATCCGGATGTGTTGAGTCTCT    | 33,5  | 16,26   | 17,24   | gd_3246_0_2_2 | LS_HCR_gd B2 |           | CCTCGTAAATCTCATCA  | AA           | ATCATCCAGTAAACCGCC | AA            | CCTCGTAAATCTCATCAAAAGCTGCTCTCTCAAACGGCTC                                             | AAATCCGGATGTGTTGAGTCTCTCAAATCATCCAGTAAACCGCC     |
| gd_3246_0_2_2_pair14 | TTCAAAACGATGATTCGGCTCCA   | CGATACAGCTACACACACTACTCT   | 33,5  | 18,14   | 15,36   | gd_3246_0_2_2 | LS_HCR_gd B2 |           | CCTCGTAAATCTCATCA  | AA           | ATCATCCAGTAAACCGCC | AA            | CCTCGTAAATCTCATCAAAATGATGATTCGCTCCA                                                  | CGATACAGCTACACACACTACTCAAATCATCCAGTAAACCGCC      |
| gd_3246_0_2_2_pair15 | CTCGAGCATCTCATGACCGCTCC   | CGGCAGCGCTGTTCTGTAGATC     | 33,64 | 13,58   | 20,06   | gd_3246_0_2_2 | LS_HCR_gd B2 |           | CCTCGTAAATCTCATCA  | AA           | ATCATCCAGTAAACCGCC | AA            | CCTCGTAAATCTCATCAAACTCGAGCATCTCTGACGGCTCC                                            | CGGCAGCGCTGTTCTGTAGATCAAATCATCCAGTAAACCGCC       |
| gd_3246_0_2_2_pair16 | AGATATCGACCGCGGATCTTCTCG  | TGCTGTGATCTTCTGGCCATCGTA   | 35,41 | 19,56   | 15,85   | gd_3246_0_2_2 | LS_HCR_gd B2 |           | CCTCGTAAATCTCATCA  | AA           | ATCATCCAGTAAACCGCC | AA            | CCTCGTAAATCTCATCAAAAGATGATGACCGCGGATCTTCTCG                                          | TGCTGTGATCTTCTGGCCATCGTAATCATCCAGTAAACCGCC       |
| gd_3246_0_2_2_pair17 | TCAGGAAGCTGTCAAGTACCGAAT  | CAATTTGGTAGTCTCCGCTGTG     | 36,91 | 16,23   | 20,68   | gd_3246_0_2_2 | LS_HCR_gd B2 |           | CCTCGTAAATCTCATCA  | AA           | ATCATCCAGTAAACCGCC | AA            | CCTCGTAAATCTCATCAAACTCAGGAAGTGTCAAGTACCGAAT                                          | CAATTTGGTAGTCTCCGCTGTGAAATCATCCAGTAAACCGCC       |
| gd_3246_0_2_2_pair18 | ATGTTGCTGTCTCAATCCAAAGC   | TCGATCTGTTTCCCGGAAATAC     | 38,61 | 17,63   | 20,99   | gd_3246_0_2_2 | LS_HCR_gd B2 |           | CCTCGTAAATCTCATCA  | AA           | ATCATCCAGTAAACCGCC | AA            | CCTCGTAAATCTCATCAAAAGTGTGCTGTCAATCCAAAGC                                             | TCGATCTGTTTCCCGGAAATACAATCATCCAGTAAACCGCC        |
| gd_3246_0_2_2_pair19 | CAATCCGCAATTTCTGATACGGA   | GCTTCCGCCCACTGATTTCTG      | 39,56 | 22,3    | 17,27   | gd_3246_0_2_2 | LS_HCR_gd B2 |           | CCTCGTAAATCTCATCA  | AA           | ATCATCCAGTAAACCGCC | AA            | CCTCGTAAATCTCATCAAAACTCGCATTTTCTGATACGGA                                             | GCTTCCGCCCACTGATTTCTGATACGGA                     |
| gd_3246_0_2_2_pair20 | TCGATGAATGAATAACTGGCGAGC  | CCCTCTTTAAGCACAGAAATCGA    | 40,18 | 20,55   | 19,63   | gd_3246_0_2_2 | LS_HCR_gd B2 |           | CCTCGTAAATCTCATCA  | AA           | ATCATCCAGTAAACCGCC | AA            | CCTCGTAAATCTCATCAAAATCGATGAATAACTGGCGAGC                                             | CCCTCTTTAAGCACAGAAATCGAATCATCCAGTAAACCGCC        |
| gd_7196_0_1_1_pair1  | AGCCTTCCGACACTTCCGACTC    | ACCTTCTCAATCCCGGCCAT       | 27,87 | 16,92   | 10,95   | gd_7196_0_1_1 | LS_HCR_gd B5 |           | CTCACTCCAATCTCTAT  | AA           | CTACCTACAATCCAA    | AA            | CTCACTCCAATCTCTATAAAGCGATCCCGACATACTGACCT                                            | ACCTTCTCAATCCCGGCCATTAACCTACAATCCAA              |
| gd_7196_0_1_1_pair2  | CTGCACTGGTGTGGTCTGAGCA    | AAAGGAGAGCGAGTACGAGTGGAA   | 29,24 | 15,85   | 13,39   | gd_7196_0_1_1 | LS_HCR_gd B5 |           | CTCACTCCAATCTCTAT  | AA           | CTACCTACAATCCAA    | AA            | CTCACTCCAATCTCTATAAAGCGATCCCGACATACTGACCT                                            | AAAGGAGAGCGAGTACGAGTGGAAATCCCTACAATCCAA          |
| gd_7196_0_1_1_pair3  | CTGCGCTCTTTGACTGCTTCTC    | TTTCCGTGGCAATGGATCAGGAC    | 31,21 | 13,69   | 17,52   | gd_7196_0_1_1 | LS_HCR_gd B5 |           | CTCACTCCAATCTCTAT  | AA           | CTACCTACAATCCAA    | AA            | CTTCCGTGGCAATGGATCAGGACTGCTTCTC                                                      | TTTCCGTGGCAATGGATCAGGACTGCTTCTC                  |
| gd_7196_0_1_1_pair4  | TACACGCGTATCATTGAGTTCGT   | TAAATCAGCAGCGGCTGGCAGCT    | 32,92 | 17,68   | 15,24   | gd_7196_0_1_1 | LS_HCR_gd B5 |           | CTCACTCCAATCTCTAT  | AA           | CTACCTACAATCCAA    | AA            | CTCACTCCAATCTCTATAATACAGCGTTCATTGAGTTCGT                                             | TAAATCAGCAGCGGCTGGCAGGACTGCTTCTC                 |
| gd_7196_0_1_1_pair5  | CACCTGTGTGTAATGTAACCGGAT  | CTCCGCAAGTTTGAAGAACATG     | 33,49 | 16,95   | 16,54   | gd_7196_0_1_1 | LS_HCR_gd B5 |           | CTCACTCCAATCTCTAT  | AA           | CTACCTACAATCCAA    | AA            | CTCACTCCAATCTCTATAAAGCGGATGTAAGTTCGAGTTC                                             | TAAATCAGCAGCGGCTGGCAGGACTGCTTCTC                 |
| gd_7196_0_1_1_pair6  | CACACGACTTCTGAGAGAGAAT    | ATGCGGTGCAACCACTCAATCA     | 34,09 | 19,49   | 14,6    | gd_7196_0_1_1 | LS_HCR_gd B5 |           | CTCACTCCAATCTCTAT  | AA           | CTACCTACAATCCAA    | AA            | CTCACTCCAATCTCTATAAAGCGGATGTAAGTTCGAGTTC                                             | TAAATCAGCAGCGGCTGGCAGGACTGCTTCTC                 |
| gd_7196_0_1_1_pair7  | TCGAGCGTTCAGGACTCTACT     | TGCTGAGAGCTCCGATGAAGAAC    | 34,88 | 17,91   | 16,96   | gd_7196_0_1_1 | LS_HCR_gd B5 |           | CTCACTCCAATCTCTAT  | AA           | CTACCTACAATCCAA    | AA            | CTCACTCCAATCTCTATAAAGCGGATGTAAGTTCGAGTTC                                             | TAAATCAGCAGCGGCTGGCAGGACTGCTTCTC                 |
| gd_7196_0_1_1_pair8  | CTGCGGCTGTAGGACTATCGGG    | CTGATGAGCTCATTGATGATCCAG   | 35,13 | 16,23   | 18,9    | gd_7196_0_1_1 | LS_HCR_gd B5 |           | CTCACTCCAATCTCTAT  | AA           | CTACCTACAATCCAA    | AA            | CTCACTCCAATCTCTATAAAGCGGATGTAAGTTCGAGTTC                                             | TAAATCAGCAGCGGCTGGCAGGACTGCTTCTC                 |
| gd_7196_0_1_1_pair9  | GGCGGATATGTAATGTTGAGT     | TCGTAGGCTGTCAATGCTGATGG    | 37,02 | 24,51   | 12,51   | gd_7196_0_1_1 | LS_HCR_gd B5 |           | CTCACTCCAATCTCTAT  | AA           | CTACCTACAATCCAA    | AA            | CTCACTCCAATCTCTATAAAGCGGATGTAAGTTCGAGTTC                                             | TAAATCAGCAGCGGCTGGCAGGACTGCTTCTC                 |
| gd_7196_0_1_1_pair10 | TCGTATCTGGATTTTGTGATGAT   | GGGTGAGGAGCGTGTGGCTCTAA    | 40,16 | 27,58   | 12,59   | gd_7196_0_1_1 | LS_HCR_gd B5 |           | CTCACTCCAATCTCTAT  | AA           | CTACCTACAATCCAA    | AA            | CTCACTCCAATCTCTATAAAGCGGATGTAAGTTCGAGTTC                                             | TAAATCAGCAGCGGCTGGCAGGACTGCTTCTC                 |
| gd_7196_0_1_1_pair11 | TTTGTCTGGTATGCTCCGGCAT    | TCACTGGAATGCTCAACTGTTGA    | 40,36 | 15,44   | 24,93   | gd_7196_0_1_1 | LS_HCR_gd B5 |           | CTCACTCCAATCTCTAT  | AA           | CTACCTACAATCCAA    | AA            | TTTGTCTGGTATGCTCCGGCAT                                                               | TCACTGGAATGCTCAACTGTTGA                          |
| gd_7196_0_1_1_pair12 | GAGATCTGGTAAATGTCATACGG   | GTGGGAGCGCTCGATGATATGT     | 40,47 | 17,6    | 22,87   | gd_7196_0_1_1 | LS_HCR_gd B5 |           | CTCACTCCAATCTCTAT  | AA           | CTACCTACAATCCAA    | AA            | GAGATCTGGTAAATGTCATACGG                                                              | GTGGGAGCGCTCGATGATATGT                           |
| gd_7196_0_1_1_pair13 | AACTGTAAGAGGTTTCGATGGGT   | GAATGCCATGTTTATAAAGTAT     | 42,45 | 14,35   | 28,1    | gd_7196_0_1_1 | LS_HCR_gd B5 |           | CTCACTCCAATCTCTAT  | AA           | CTACCTACAATCCAA    | AA            | AACTGTAAGAGGTTTCGATGGGT                                                              | GAATGCCATGTTTATAAAGTAT                           |
| gd_7196_0_1_1_pair14 | CTGTTATCAGTCTCCCAAAATTA   | CCAGATTTCTGTATGAGGTGAGCAA  | 44,07 | 23,6    | 20,47   | gd_7196_0_1_1 | LS_HCR_gd B5 |           | CTCACTCCAATCTCTAT  | AA           | CTACCTACAATCCAA    | AA            | CTGTTATCAGTCTCCCAAAATTA                                                              | CCAGATTTCTGTATGAGGTGAGCAA                        |
| gd_7196_0_1_1_pair15 | ACTGCGACTTTTCATTTCTACTGGT | TTGTTGTGAGGAGGTTGTGGAGGT   | 45,09 | 25,55   | 19,54   | gd_7196_0_1_1 | LS_HCR_gd B5 |           | CTCACTCCAATCTCTAT  | AA           | CTACCTACAATCCAA    | AA            | ACTGCGACTTTTCATTTCTACTGGT                                                            | TTGTTGTGAGGAGGTTGTGGAGGT                         |
| gd_7196_0_1_1_pair16 | CGTCACTTTGAAATATGCTCCGA   | TGGATGGTAAAGATACGGAATCTG   | 45,15 | 24,61   | 20,53   | gd_7196_0_1_1 | LS_HCR_gd B5 |           | CTCACTCCAATCTCTAT  | AA           | CTACCTACAATCCAA    | AA            | CGTCACTTTGAAATATGCTCCGA                                                              | TGGATGGTAAAGATACGGAATCTG                         |
| gd_7196_0_1_1_pair17 | AATTTTGGTCTTATCTGAAATTC   | TCGGGTGTGATTTGAGTGTGGGT    | 45,63 | 33,48   | 12,15   | gd_7196_0_1_1 | LS_HCR_gd B5 |           | CTCACTCCAATCTCTAT  | AA           | CTACCTACAATCCAA    | AA            | AATTTTGGTCTTATCTGAAATTC                                                              | TCGGGTGTGATTTGAGTGTGGGT                          |
| gd_7196_0_1_1_pair18 | ACTGTTACTGTAGGCGACTCGGT   | CTTTTCAAGTCTAAAGGCTCAT     | 45,76 | 15,46   | 30,31   | gd_7196_0_1_1 | LS_HCR_gd B5 |           | CTCACTCCAATCTCTAT  | AA           | CTACCTACAATCCAA    | AA            | ACTGTTACTGTAGGCGACTCGGT                                                              | CTTTTCAAGTCTAAAGGCTCAT                           |
| gd_7196_0_1_1_pair19 | GATCGATGAAAATGATTAAGTGT   | CGCGTCTAACTAGGATGATCA      | 47,71 | 28,26   | 19,45   | gd_7196_0_1_1 | LS_HCR_gd B5 |           | CTCACTCCAATCTCTAT  | AA           | CTACCTACAATCCAA    | AA            | GATCGATGAAAATGATTAAGTGT                                                              | CGCGTCTAACTAGGATGATCA                            |
| gd_7196_0_1_1_pair20 | TGAGAGCAAAATGAAAGCGGTCGG  | TGATCGAATATGGAATGGAATTTG   | 48,14 | 16,03   | 32,11   | gd_7196_0_1_1 | LS_HCR_gd B5 |           | CTCACTCCAATCTCTAT  | AA           | CTACCTACAATCCAA    | AA            | TGAGAGCAAAATGAAAGCGGTCGG                                                             | TGATCGAATATGGAATGGAATTTG                         |
| gir_dor_ovo_pair1    | CTTGTAAAGTGAAGAAATTTGACCC | AAGAGTAAATGAAGAAAGTGCAT    | 62,56 | 26,93   | 35,63   | gir_dor_ovo   | LS_HCR_gd B4 |           | CCTCAACCTACTCCCAAC | AA           | TCTCACCATATCGCTTC  | AT            | CTTGTAAAGTGAAGAAATTTGACCC                                                            | AAGAGTAAATGAAGAAAGTGCAT                          |
| gir_dor_ovo_pair2    | GATAAATCTGTGGCTGCTCCTCAT  | GTCTTTCGAAATCTCCAGTITTC    | 42,56 | 22,84   | 19,72   | gir_dor_ovo   | LS_HCR_gd B4 |           | CCTCAACCTACTCCCAAC | AA           | TCTCACCATATCGCTTC  | AT            | GATAAATCTGTGGCTGCTCCTCAT                                                             | GTCTTTCGAAATCTCCAGTITTC                          |
| gir_dor_ovo_pair3    | GAAACATACTATCATCTTGCAGCG  | TGGCCAAAGCTAAGGATAATAT     | 54,17 | 28,26   | 25,92   | gir_dor_ovo   | LS_HCR_gd B4 |           | CCTCAACCTACTCCCAAC | AA           | TCTCACCATATCGCTTC  | AT            | GAAACATACTATCATCTTGCAGCG                                                             | TGGCCAAAGCTAAGGATAATAT                           |
| gir_dor_ovo_pair4    | TCGTCAGTATTAAGTGAAGTATTC  | AAAGCAATCAATGAAAGAAATTC    | 52,7  | 23,42   | 29,28   | gir_dor_ovo   | LS_HCR_gd B4 |           | CCTCAACCTACTCCCAAC | AA           | TCTCACCATATCGCTTC  | AT            | TCGTCAGTATTAAGTGAAGTATTC                                                             | AAAGCAATCAATGAAAGTATTC                           |
| gir_dor_ovo_pair5    | AGAAATCTGAAACATTCATTTATC  | AAGTGGGGTAAACCAATTCGCGAA   | 53,23 | 34,43   | 18,8    | gir_dor_ovo   | LS_HCR_gd B4 |           | CCTCAACCTACTCCCAAC | AA           | TCTCACCATATCGCTTC  | AT            | AGAAATCTGAAACATTCATTTATC                                                             | AAGTGGGGTAAACCAATTCGCGAA                         |
| gir_dor_ovo_pair6    | CGATATTAACGAATCTTTTGAA    | TGCTGGAGCTGTCGATACATTTGA   | 47,7  | 33,76   | 13,94   | gir_dor_ovo   | LS_HCR_gd B4 |           | CCTCAACCTACTCCCAAC | AA           | TCTCACCATATCGCTTC  | AT            | CGATATTAACGAATCTTTTGAA                                                               | TGCTGGAGCTGTCGATACATTTGA                         |
| gir_dor_ovo_pair7    | CAAGTCTTCTGAAAGAGCTTCC    | CTTTAATTTCTCAAAGTGAAGTGT   | 56,82 | 23,1    | 33,72   | gir_dor_ovo   | LS_HCR_gd B4 |           | CCTCAACCTACTCCCAAC | AA           | TCTCACCATATCGCTTC  | AT            | CAAGTCTTCTGAAAGAGCTTCC                                                               | CTTTAATTTCTCAAAGTGAAGTGT                         |
| gir_dor_ovo_pair8    | ATAAATTAACCTAAGATGAAGTA   | TCTTCTCAAGTCTCTCAGATG      | 60,83 | 38,42   | 22,41   | gir_dor_ovo   | LS_HCR_gd B4 |           | CCTCAACCTACTCCCAAC | AA           | TCTCACCATATCGCTTC  | AT            | ATAAATTAACCTAAGATGAAGTA                                                              | TCTTCTCAAGTCTCTCAGATG                            |
| gir_dor_ovo_pair9    | AATGTGTGAGCAAAATCTTCTGT   | TCCCGATCTGTAAGATAAATTT     | 62,1  | 29,88   | 32,22   | gir_dor_ovo   | LS_HCR_gd B4 |           | CCTCAACCTACTCCCAAC | AA           | TCTCACCATATCGCTTC  | AT            | AATGTGTGAGCAAAATCTTCTGT                                                              | TCCCGATCTGTAAGATAAATTT                           |
| gir_dor_ovo_pair10   | CCGTCCCAACCGTGTGCAAGTTAA  | AATGTTTCTGCAAGGGTTCACAA    | 42,15 | 20,86   | 21,3    | gir_dor_ovo   | LS_HCR_gd B4 |           | CCTCAACCTACTCCCAAC | AA           | TCTCACCATATCGCTTC  | AT            | CCGTCCCAACCGTGTGCAAGTTAA                                                             | AATGTTTCTGCAAGGGTTCACAA                          |
| gir_dor_ovo_pair11   | TTTCTCCAAATTTTCAAAATCT    | TTTGTGCGAGTCTTACATTTG      | 62,12 | 34,54   | 27,58   | gir_dor_ovo   | LS_HCR_gd B4 |           | CCTCAACCTACTCCCAAC | AA           | TCTCACCATATCGCTTC  | AT            | TTTCTCCAAATTTTCAAAATCT                                                               | TTTGTGCGAGTCTTACATTTG                            |
| gir_dor_ovo_pair12   | CGAATATGACCTGATATGCTCT    | AGCCAGTCGAAATTAACCCAGTAC   | 42,43 | 24,26   | 18,17   | gir_dor_ovo   | LS_HCR_gd B4 |           | CCTCAACCTACTCCCAAC | AA           | TCTCACCATATCGCTTC  | AT            | CGAATATGACCTGATATGCTCT                                                               | AGCCAGTCGAAATTAACCCAGTAC                         |
| gir_dor_ovo_pair13   | AGTCAATGAAGCAATGAAGGGTTT  | CTGTGTGACCTGTGTGCGCTTTT    | 43,52 | 26,7    | 16,82   | gir_dor_ovo   | LS_HCR_gd B4 |           | CCTCAACCTACTCCCAAC | AA           | TCTCACCATATCGCTTC  | AT            | AGTCAATGAAGCAATGAAGGGTTT                                                             | CTGTGTGACCTGTGTGCGCTTTT                          |
| gir_dor_ovo_pair14   | TTTCTGTTCAACTTTCAGATTTGT  | CTTTTAAACGAGCAAGCTGACTAA   | 41,63 | 22,26   | 19,37   | gir_dor_ovo   | LS_HCR_gd B4 |           | CCTCAACCTACTCCCAAC | AA           | TCTCACCATATCGCTTC  | AT            | TTTCTGTTCAACTTTCAGATTTGT                                                             | CTTTTAAACGAGCAAGCTGACTAA                         |
| gir_dor_ovo_pair15   | TCGATCCGTAATCTCCTGGTAT    | CGCGCTCCTTATACAATAATTA     | 46,27 | 21,53   | 24,74   | gir_dor_ovo   | LS_HCR_gd B4 |           | CCTCAACCTACTCCCAAC | AA           | TCTCACCATATCGCTTC  | AT            | TCGATCCGTAATCTCCTGGTAT                                                               | CGCGCTCCTTATACAATAATTA                           |

|                        |                           |                            |       |       |                       |              |                       |                       |                            |
|------------------------|---------------------------|----------------------------|-------|-------|-----------------------|--------------|-----------------------|-----------------------|----------------------------|
| gir_dor_ovo_pair16     | ACTATAACTGCAAACTCACAAGGA  | GTTTAGCCATGTAGTTTACAGGAA   | 48,36 | 22,67 | 25,69 gir_dor_ovo     | LS_HCR_gd B4 | CCTCAACCTACCTCCAAC AA | TCTCACCATATTGCGTTC AT | CCTCAACCTACTCCAACAACTA     |
| gir_dor_ovo_pair17     | AAGGAATCCGGATGCTCTTCAACAA | CCTTTTAACTCTCTCTTGGCCAT    | 47,21 | 19,67 | 27,54 gir_dor_ovo     | LS_HCR_gd B4 | CCTCAACCTACCTCCAAC AA | TCTCACCATATTGCGTTC AT | CCTCAACCTACTCCAACAAAGG     |
| gir_dor_ovo_pair18     | AATAATCAAAATTAATTCATGTCG  | GATGATGAAGAAATAAAATACATA   | 78    | 39,06 | 38,95 gir_dor_ovo     | LS_HCR_gd B4 | CCTCAACCTACTCCAAC AA  | TCTCACCATATTGCGTTC AT | GATGATGAAGAAATAAAATACATA   |
| gir_dor_ovo_pair19     | ACTTTTGACITTCATAAGTACACAC | TG5AAATTTATGATCAAAATCAACT  | 60,2  | 27,86 | 32,34 gir_dor_ovo     | LS_HCR_gd B4 | CCTCAACCTACTCCAAC AA  | TCTCACCATATTGCGTTC AT | TG5AAATTTATGATCAAAATCAACT  |
| gir_dor_six-1-2_pair1  | GCAAACTTCAGCTTTGGTCTGTGGA | TGGAGGTGTATGTCAGGAGGGT     | 31,15 | 15,71 | 15,44 gir_dor_six-1-2 | LS_HCR_gd B1 | GAGGAGGGCAGCAACGAA    | GAAGAGTCTCTCTTACG TA  | GAGGAGGGCAGCAACGGAACAA     |
| gir_dor_six-1-2_pair2  | TCTGTTTCATGGATCACTCCGGAA  | AATCAAGGTTGGTGGCGGAGACA    | 32,41 | 18,72 | 13,69 gir_dor_six-1-2 | LS_HCR_gd B1 | GAGGAGGGCAGCAACGAA    | GAAGAGTCTCTCTTACG TA  | AATCAAGGTTGGTGGCGGAGACA    |
| gir_dor_six-1-2_pair3  | CG5AATCGCAGAGACTCAGTAGTC  | CCTGTCTTGTGGAACCACTGCT     | 32,65 | 14,92 | 17,73 gir_dor_six-1-2 | LS_HCR_gd B1 | GAGGAGGGCAGCAACGAA    | GAAGAGTCTCTCTTACG TA  | CCTGTCTTGTGGAACCACTGCT     |
| gir_dor_six-1-2_pair4  | TTG5GACACTTGGTGGCTGTAAC   | TCTGTTGCTTCTGGTCTCTGAACC   | 34,11 | 15,95 | 18,16 gir_dor_six-1-2 | LS_HCR_gd B1 | GAGGAGGGCAGCAACGAA    | GAAGAGTCTCTCTTACG TA  | TCTGTTGCTTCTGGTCTCTGAACC   |
| gir_dor_six-1-2_pair5  | GGCCATCGAGTGATTGAAGTCCAC  | CCGGTTCGGACGGAGACAACAAAC   | 34,56 | 15,4  | 19,16 gir_dor_six-1-2 | LS_HCR_gd B1 | GAGGAGGGCAGCAACGAA    | GAAGAGTCTCTCTTACG TA  | CCGGTTCGGACGGAGACAACAAAC   |
| gir_dor_six-1-2_pair6  | TCGATCTCATAGTAAAACAAGTAAT | GAATGTCTGTTGGCTGGCTGTGA    | 35,17 | 25,03 | 10,13 gir_dor_six-1-2 | LS_HCR_gd B1 | GAGGAGGGCAGCAACGAA    | GAAGAGTCTCTCTTACG TA  | GAATGTCTGTTGGCTGGCTGTGA    |
| gir_dor_six-1-2_pair7  | ATGTTTGTCTTATTTTCAGCGGAG  | GTCGGCATCAGAAGCGAAAGATCA   | 35,59 | 21,64 | 13,95 gir_dor_six-1-2 | LS_HCR_gd B1 | GAGGAGGGCAGCAACGAA    | GAAGAGTCTCTCTTACG TA  | GTCGGCATCAGAAGCGAAAGATCA   |
| gir_dor_six-1-2_pair8  | CATTGTCGAAGAACCGCTCGGGATT | GGTGACGGATAGGGATATGCAAAT   | 36,79 | 15,38 | 21,41 gir_dor_six-1-2 | LS_HCR_gd B1 | GAGGAGGGCAGCAACGAA    | GAAGAGTCTCTCTTACG TA  | GGTGACGGATAGGGATATGCAAAT   |
| gir_dor_six-1-2_pair9  | TGTAATGAAGGACTCACGGTTTCA  | ATAACCTCTTGAATACCAGTGCCA   | 39,61 | 19,93 | 19,68 gir_dor_six-1-2 | LS_HCR_gd B1 | GAGGAGGGCAGCAACGAA    | GAAGAGTCTCTCTTACG TA  | ATAACCTCTTGAATACCAGTGCCA   |
| gir_dor_six-1-2_pair10 | CCTCCGTTTTTCATGATGGCTTCT  | GGGTACGATTGTAGTTCTTCAACG   | 40,44 | 20,17 | 20,27 gir_dor_six-1-2 | LS_HCR_gd B1 | GAGGAGGGCAGCAACGAA    | GAAGAGTCTCTCTTACG TA  | GGGTACGATTGTAGTTCTTCAACG   |
| gir_dor_six-1-2_pair11 | ATTGCCATAGTATTCTGAAGAAAA  | AG5CGTATCAAGTCTGGGTATTGG   | 41,44 | 23,87 | 17,57 gir_dor_six-1-2 | LS_HCR_gd B1 | GAGGAGGGCAGCAACGAA    | GAAGAGTCTCTCTTACG TA  | AG5CGTATCAAGTCTGGGTATTGG   |
| gir_dor_six-1-2_pair12 | AATGCTAATCTGCAATTAATCCCC  | TGGCAAGGTGGAAAGACCATATGA   | 42,5  | 25,91 | 16,59 gir_dor_six-1-2 | LS_HCR_gd B1 | GAGGAGGGCAGCAACGAA    | GAAGAGTCTCTCTTACG TA  | TGGCAAGGTGGAAAGACCATATGA   |
| gir_dor_six-1-2_pair13 | AGTAAAGAAATAAATGGCTGGGG   | TGG5AAGGTTATGTAACCCGGAACT  | 42,59 | 21,78 | 20,81 gir_dor_six-1-2 | LS_HCR_gd B1 | GAGGAGGGCAGCAACGAA    | GAAGAGTCTCTCTTACG TA  | TGG5AAGGTTATGTAACCCGGAACT  |
| gir_dor_six-1-2_pair14 | TGCTATGAAGAACGACAGCTGCTT  | AAGATTGCAAAAGCTCTTGAAT     | 43,18 | 13,89 | 29,28 gir_dor_six-1-2 | LS_HCR_gd B1 | GAGGAGGGCAGCAACGAA    | GAAGAGTCTCTCTTACG TA  | AAGATTGCAAAAGCTCTTGAAT     |
| gir_dor_six-1-2_pair15 | CTCG5AAAGGATATTTTGGCGGAC  | CTGCTTCTTCCACATCCCAACTG    | 43,83 | 25,57 | 18,27 gir_dor_six-1-2 | LS_HCR_gd B1 | GAGGAGGGCAGCAACGAA    | GAAGAGTCTCTCTTACG TA  | CTGCTTCTTCCACATCCCAACTG    |
| gir_dor_six-1-2_pair16 | TATTTGGTATGCTACGG5AAGGAG  | GGTGTAGGAGCTGTATTAGTTGGA   | 45,35 | 24,69 | 20,66 gir_dor_six-1-2 | LS_HCR_gd B1 | GAGGAGGGCAGCAACGAA    | GAAGAGTCTCTCTTACG TA  | GGTGTAGGAGCTGTATTAGTTGGA   |
| gir_dor_six-1-2_pair17 | AAAGTTATAGTGATTACGG5GAG   | ATAATGAGCTTGTAAACAGAGTGT   | 48,27 | 26,6  | 21,67 gir_dor_six-1-2 | LS_HCR_gd B1 | GAGGAGGGCAGCAACGAA    | GAAGAGTCTCTCTTACG TA  | ATAATGAGCTTGTAAACAGAGTGT   |
| gir_dor_six-1-2_pair18 | GCTAGAAATTTGGGATATTGTCCG  | AGTACTGTATTAACGAGAGATCT    | 60,05 | 29,56 | 30,48 gir_dor_six-1-2 | LS_HCR_gd B1 | GAGGAGGGCAGCAACGAA    | GAAGAGTCTCTCTTACG TA  | AGTACTGTATTAACGAGAGATCT    |
| gir_dor_six-1-2_pair19 | GTACTGCACATGGAATGATAATCAC | TTATCATAAATCAGATAAGTGGAA   | 60,16 | 23,47 | 36,7 gir_dor_six-1-2  | LS_HCR_gd B1 | GAGGAGGGCAGCAACGAA    | GAAGAGTCTCTCTTACG TA  | TTATCATAAATCAGATAAGTGGAA   |
| gir_dor_sp6-9_pair1    | AGAACAACCTATGGAAACTATGTT  | TG5CAATGACCAATGAGAACAACA   | 50,14 | 30,56 | 19,58 gir_dor_sp6-9   | LS_HCR_gd B3 | GTCCTCGCTCTATATCT TT  | CCACTCAACTTTAACCCG TT | TG5CAATGACCAATGAGAACAACA   |
| gir_dor_sp6-9_pair2    | CATTGGTACCAACTGATATTCAGT  | AATGCTTGTATCATGATATTTAAAT  | 70,09 | 32,69 | 37,4 gir_dor_sp6-9    | LS_HCR_gd B3 | GTCCTCGCTCTATATCT TT  | CCACTCAACTTTAACCCG TT | AATGCTTGTATCATGATATTTAAAT  |
| gir_dor_sp6-9_pair3    | AGTCCATATTTGATTAITACGAAA  | TGTTCTGCACATTTTGAAGAAGT    | 53,93 | 31,43 | 22,5 gir_dor_sp6-9    | LS_HCR_gd B3 | GTCCTCGCTCTATATCT TT  | CCACTCAACTTTAACCCG TT | TGTTCTGCACATTTTGAAGAAGT    |
| gir_dor_sp6-9_pair4    | TAGCTTTCACCAAGTACTGACTG   | ACATCATTTTTTCTGACAGACT     | 47,95 | 22,28 | 25,67 gir_dor_sp6-9   | LS_HCR_gd B3 | GTCCTCGCTCTATATCT TT  | CCACTCAACTTTAACCCG TT | ACATCATTTTTTCTGACAGACT     |
| gir_dor_sp6-9_pair5    | ACGG5AATTTGTAATTCGGTTTCA  | TATATAAATCTCCATAAATGTGA    | 65,03 | 24,92 | 40,11 gir_dor_sp6-9   | LS_HCR_gd B3 | GTCCTCGCTCTATATCT TT  | CCACTCAACTTTAACCCG TT | TATATAAATCTCCATAAATGTGA    |
| gir_dor_sp6-9_pair6    | CTGAACCTTGG5AACTTGGTGGGA  | CGGGATGAACAATAATCATTCAT    | 50,86 | 21,13 | 29,73 gir_dor_sp6-9   | LS_HCR_gd B3 | GTCCTCGCTCTATATCT TT  | CCACTCAACTTTAACCCG TT | CGGGATGAACAATAATCATTCAT    |
| gir_dor_sp6-9_pair7    | AGTTTGGTGGATTTGGTATGAAAG  | TGAGG5GGTATGATTTGAGTTGA    | 50,34 | 25,88 | 24,45 gir_dor_sp6-9   | LS_HCR_gd B3 | GTCCTCGCTCTATATCT TT  | CCACTCAACTTTAACCCG TT | TGAGG5GGTATGATTTGAGTTGA    |
| gir_dor_sp6-9_pair8    | GATTCCTGTAACACTCAGTATATTA | GAAGACTGG5TAAATGAAGAGGT    | 48,77 | 31,47 | 17,3 gir_dor_sp6-9    | LS_HCR_gd B3 | GTCCTCGCTCTATATCT TT  | CCACTCAACTTTAACCCG TT | GAAGACTGG5TAAATGAAGAGGT    |
| gir_dor_sp6-9_pair9    | TTTTGGAAGATTTGAAATTTATAT  | TGATGAATGAAG5GGTTAAGTAA    | 65,88 | 39    | 26,88 gir_dor_sp6-9   | LS_HCR_gd B3 | GTCCTCGCTCTATATCT TT  | CCACTCAACTTTAACCCG TT | TGATGAATGAAG5GGTTAAGTAA    |
| gir_dor_sp6-9_pair10   | TGGATATCTTGAAGAGAACTATTT  | ATTTGGCAGGTGCAAGCGG5CAGA   | 50,39 | 31,17 | 19,22 gir_dor_sp6-9   | LS_HCR_gd B3 | GTCCTCGCTCTATATCT TT  | CCACTCAACTTTAACCCG TT | ATTTGGCAGGTGCAAGCGG5CAGA   |
| gir_dor_sp6-9_pair11   | TGCAGAAAACCG5AAACCTGTCTT  | AATGTGG5CAATATGGGTAGAATTC  | 44,44 | 18,56 | 25,88 gir_dor_sp6-9   | LS_HCR_gd B3 | GTCCTCGCTCTATATCT TT  | CCACTCAACTTTAACCCG TT | AATGTGG5CAATATGGGTAGAATTC  |
| gir_dor_sp6-9_pair12   | TGG5TTCGAATATAGTTTCCACA   | GCCATCTTAAATGTGCTTCAAAGT   | 56,22 | 25,42 | 30,81 gir_dor_sp6-9   | LS_HCR_gd B3 | GTCCTCGCTCTATATCT TT  | CCACTCAACTTTAACCCG TT | GCCATCTTAAATGTGCTTCAAAGT   |
| gir_dor_sp6-9_pair13   | ATAG5CAATGCAACGAATGGTCT   | CTGATCTGTTGAACGTTTGCACCA   | 45,29 | 23,87 | 21,42 gir_dor_sp6-9   | LS_HCR_gd B3 | GTCCTCGCTCTATATCT TT  | CCACTCAACTTTAACCCG TT | CTGATCTGTTGAACGTTTGCACCA   |
| gir_dor_sp6-9_pair14   | TCGTGGTATGAGTTTTCAGGTGCT  | CCACATTTGG5GCAATTTATTTCT   | 38,88 | 12,84 | 26,04 gir_dor_sp6-9   | LS_HCR_gd B3 | GTCCTCGCTCTATATCT TT  | CCACTCAACTTTAACCCG TT | CCACATTTGG5GCAATTTATTTCT   |
| gir_dor_sp6-9_pair15   | TTTTAACTGCTCAATTCGACTAAAG | ACAGTGTATGAGTATAAATATGCT   | 55,33 | 26,67 | 28,66 gir_dor_sp6-9   | LS_HCR_gd B3 | GTCCTCGCTCTATATCT TT  | CCACTCAACTTTAACCCG TT | ACAGTGTATGAGTATAAATATGCT   |
| gir_dor_sp6-9_pair16   | AG5GACCAATTTATTTGTGAACAA  | AACAATAAATCCACCAAAACTAA    | 65,66 | 31,8  | 33,86 gir_dor_sp6-9   | LS_HCR_gd B3 | GTCCTCGCTCTATATCT TT  | CCACTCAACTTTAACCCG TT | AACAATAAATCCACCAAAACTAA    |
| gir_mul_ovo_pair1      | TGTAAGTGAAGAAATG5ACCCCA   | GAGTAAATGAAGAAAGTGTCTATA   | 59,06 | 21,26 | 37,8 gir_mul_ovo      | LS_HCR_gm B4 | CCTCAACCTACTCCAAC AA  | TCTCACCATATTGCGTTC AT | GAGTAAATGAAGAAAGTGTCTATA   |
| gir_mul_ovo_pair2      | CG5GCTGCTCCTGATTTGGCCAGC  | TTTCCAGTTTTCAITGATAAATCT   | 47,41 | 16,89 | 30,52 gir_mul_ovo     | LS_HCR_gm B4 | CCTCAACCTACTCCAAC AA  | TCTCACCATATTGCGTTC AT | TTTCCAGTTTTCAITGATAAATCT   |
| gir_mul_ovo_pair3      | ACTATCATCTTCTGACTTGAAGCTT | GAATGCAAGGATAAATATACGAACA  | 50,93 | 22,66 | 28,27 gir_mul_ovo     | LS_HCR_gm B4 | CCTCAACCTACTCCAAC AA  | TCTCACCATATTGCGTTC AT | GAATGCAAGGATAAATATACGAACA  |
| gir_mul_ovo_pair4      | TGAAGTACACTTCTTATGGAATGG  | ATTAAGAACTGTTTCTGGTGTATT   | 59,77 | 29,32 | 30,46 gir_mul_ovo     | LS_HCR_gm B4 | CCTCAACCTACTCCAAC AA  | TCTCACCATATTGCGTTC AT | ATTAAGAACTGTTTCTGGTGTATT   |
| gir_mul_ovo_pair5      | AGAATTTGAGGAAAACCG5CAAAA  | TTCAAGTGGTGGTGTGAAGAACAT   | 50,87 | 25,73 | 25,14 gir_mul_ovo     | LS_HCR_gm B4 | CCTCAACCTACTCCAAC AA  | TCTCACCATATTGCGTTC AT | TTCAAGTGGTGGTGTGAAGAACAT   |
| gir_mul_ovo_pair6      | ATITGCTCGAATGAAGAACTTGA   | TCTTTG5AAATGAAGATGG5GAATA  | 58,43 | 29,78 | 28,65 gir_mul_ovo     | LS_HCR_gm B4 | CCTCAACCTACTCCAAC AA  | TCTCACCATATTGCGTTC AT | TCTTTG5AAATGAAGATGG5GAATA  |
| gir_mul_ovo_pair7      | AGCTGCTGATACATTTGATTCGAT  | CTTCTGAAGAGAAGTTCAGATCA    | 48,7  | 21,13 | 27,57 gir_mul_ovo     | LS_HCR_gm B4 | CCTCAACCTACTCCAAC AA  | TCTCACCATATTGCGTTC AT | CTTCTGAAGAGAAGTTCAGATCA    |
| gir_mul_ovo_pair8      | CCTATATCTTCAAATGAGTGTCT   | TCACTAAGATGAAGATTTTCTCAA   | 66,75 | 35,82 | 30,93 gir_mul_ovo     | LS_HCR_gm B4 | CCTCAACCTACTCCAAC AA  | TCTCACCATATTGCGTTC AT | TCACTAAGATGAAGATTTTCTCAA   |
| gir_mul_ovo_pair9      | CCTCAACACTCTTCTCAGATTGA   | TGCTTTATTTTTAATGG5TTTAAACA | 58,18 | 23,96 | 34,23 gir_mul_ovo     | LS_HCR_gm B4 | CCTCAACCTACTCCAAC AA  | TCTCACCATATTGCGTTC AT | TGCTTTATTTTTAATGG5TTTAAACA |
| gir_mul_ovo_pair10     | TTTTAAACTTCCGGATCTGTAAGA  | CACAATTCGGTCCCAACGGTTGTC   | 49,59 | 27,44 | 22,16 gir_mul_ovo     | LS_HCR_gm B4 | CCTCAACCTACTCCAAC AA  | TCTCACCATATTGCGTTC AT | CACAATTCGGTCCCAACGGTTGTC   |
| gir_mul_ovo_pair11     | TCTTTGAGG5GAAATTTTGGTGA   | GGGATG5AATGTGAAGTGTGCAAT   | 44,77 | 29,01 | 15,76 gir_mul_ovo     | LS_HCR_gm B4 | CCTCAACCTACTCCAAC AA  | TCTCACCATATTGCGTTC AT | GGGATG5AATGTGAAGTGTGCAAT   |
| gir_mul_ovo_pair12     | TGCAAAAGCCGATCAAAATGACCCC | AATCAATAAAG5GTTG5AAACAATA  | 48,39 | 15,66 | 32,73 gir_mul_ovo     | LS_HCR_gm B4 | CCTCAACCTACTCCAAC AA  | TCTCACCATATTGCGTTC AT | AATCAATAAAG5GTTG5AAACAATA  |
| gir_mul_ovo_pair13     | CCTGTG5GACTGTTGATGCTGTC   | CAACTTGCATTTGTAAAG5TTGAA   | 45,83 | 16,29 | 29,53 gir_mul_ovo     | LS_HCR_gm B4 | CCTCAACCTACTCCAAC AA  | TCTCACCATATTGCGTTC AT | CAACTTGCATTTGTAAAG5TTGAA   |
| gir_mul_ovo_pair14     | GCTTCTTCAAGCAGCAAGCTGACTA | TTGAGTCCCATGAATCTCACTTGA   | 37,23 | 16,3  | 20,94 gir_mul_ovo     | LS_HCR_gm B4 | CCTCAACCTACTCCAAC AA  | TCTCACCATATTGCGTTC AT | TTGAGTCCCATGAATCTCACTTGA   |
| gir_mul_ovo_pair15     | AGCTTATTCGG5GCTCTTATACA   | CTATACTGCAAACTCAAG5GAA     | 47,11 | 21,76 | 25,35 gir_mul_ovo     | LS_HCR_gm B4 | CCTCAACCTACTCCAAC AA  | TCTCACCATATTGCGTTC AT | CTATACTGCAAACTCAAG5GAA     |
| gir_mul_ovo_pair16     | GGTGTAGCCATGTAGTTTACAGGA  | AG5AATGG5GATGTTCTGACTAAT   | 50,17 | 23,52 | 26,65 gir_mul_ovo     | LS_HCR_gm B4 | CCTCAACCTACTCCAAC AA  | TCTCACCATATTGCGTTC AT | AG5AATGG5GATGTTCTGACTAAT   |
| gir_mul_ovo_pair17     | TCTTTTTAAGTTCCTTTGG5CA    | GCTATGG5GATACATCAATGTAT    | 64,75 | 29,26 | 35,48 gir_mul_ovo     | LS_HCR_gm B4 | CCTCAACCTACTCCAAC AA  | TCTCACCATATTGCGTTC AT | GCTATGG5GATACATCAATGTAT    |
| gir_mul_ovo_pair18     | AATATCAGAAATAAGTCAAACTC   | TGACGCAAAATGATGATGAAACAATA | 62,05 | 37,56 | 24,49 gir_mul_ovo     | LS_HCR_gm B4 | CCTCAACCTACTCCAAC AA  | TCTCACCATATTGCGTTC AT | TGACGCAAAATGATGATGAAACAATA |
| gir_mul_six-1-2_pair1  | CACGAGCAAGCAACAGACATTCAA  | GG5CAATGGTACC5GGGATCGATA   | 26,97 | 12,15 | 14,82 gir_mul_six-1-2 | LS_HCR_gm B1 | GAGGAGGGCAGCAACGAA    | GAAGAGTCTCTCTTACG TA  | GG5CAATGGTACC5GGGATCGATA   |

|                        |                            |                            |       |       |                       |              |                     |                    |    |                                                                                   |
|------------------------|----------------------------|----------------------------|-------|-------|-----------------------|--------------|---------------------|--------------------|----|-----------------------------------------------------------------------------------|
| gir_mul_six-1-2_pair2  | AGGTGCTGTTGTTGTGAGGTCTCT   | CCGTCACGATGGGGTTTACACAAGA  | 27,05 | 13,58 | 13,47 gir_mul_six-1-2 | LS_HCR_gm B1 | GAGGAGGCGCAGCAACGAA | GAAGAGTCTCCCTTACG  | TA | GAGGAGGGCAGCAACGAAAGGTTCTGTTGTGTGAGGTCCCGGTACGATGGGTTTCAACAAGATAGAAGAGTCTCCCTTACG |
| gir_mul_six-1-2_pair3  | CGTGAAGATTTGCTCAACCCTCTGC  | GTGACGACTTAGATTCCACAGACCA  | 32,67 | 15,12 | 17,48 gir_mul_six-1-2 | LS_HCR_gm B1 | GAGGAGGGCAGCAACGAA  | GAAGAGTCTCCCTTACG  | TA | GAGGAGGGCAGCAACGAAAGGTTCTGTTGTGTGAGGTCCCGGTACGATGGGTTTCAACAAGATAGAAGAGTCTCCCTTACG |
| gir_mul_six-1-2_pair4  | TTCAAAACCAACGAAAGCGTACTGAC | TATGGTCTCTCCACCTGGCCAAAC   | 36,17 | 20,18 | 15,98 gir_mul_six-1-2 | LS_HCR_gm B1 | GAGGAGGGCAGCAACGAA  | GAAGAGTCTCCCTTACG  | TA | GAGGAGGGCAGCAACGAAAGGTTCTGTTGTGTGAGGTCCCGGTACGATGGGTTTCAACAAGATAGAAGAGTCTCCCTTACG |
| gir_mul_six-1-2_pair5  | CTGAATAAGCAGAGTTGACGACGAC  | CGTCAACGAGGAAAGAAAGATGCT   | 37,08 | 14,8  | 22,28 gir_mul_six-1-2 | LS_HCR_gm B1 | GAGGAGGGCAGCAACGAA  | GAAGAGTCTCCCTTACG  | TA | GAGGAGGGCAGCAACGAAAGGTTCTGTTGTGTGAGGTCCCGGTACGATGGGTTTCAACAAGATAGAAGAGTCTCCCTTACG |
| gir_mul_six-1-2_pair6  | ACTCTCAGGACCTCAGTGATCTGCT  | CTCCGACGACCGACTTAGATTATA   | 38,76 | 16,8  | 21,96 gir_mul_six-1-2 | LS_HCR_gm B1 | GAGGAGGGCAGCAACGAA  | GAAGAGTCTCCCTTACG  | TA | GAGGAGGGCAGCAACGAAAGGTTCTGTTGTGTGAGGTCCCGGTACGATGGGTTTCAACAAGATAGAAGAGTCTCCCTTACG |
| gir_mul_six-1-2_pair7  | GATCTCTGCGGCTTGTGATCCGACG  | GTCTGTAAMAAATAAGCAACAATG   | 40,27 | 15,16 | 25,12 gir_mul_six-1-2 | LS_HCR_gm B1 | GAGGAGGGCAGCAACGAA  | GAAGAGTCTCCCTTACG  | TA | GAGGAGGGCAGCAACGAAAGGTTCTGTTGTGTGAGGTCCCGGTACGATGGGTTTCAACAAGATAGAAGAGTCTCCCTTACG |
| gir_mul_six-1-2_pair8  | TCGCAGAAAATCCTCCACCGGACA   | ACTTCCGAGGCTGCGGAAAATACGA  | 40,5  | 20,64 | 19,86 gir_mul_six-1-2 | LS_HCR_gm B1 | GAGGAGGGCAGCAACGAA  | GAAGAGTCTCCCTTACG  | TA | GAGGAGGGCAGCAACGAAAGGTTCTGTTGTGTGAGGTCCCGGTACGATGGGTTTCAACAAGATAGAAGAGTCTCCCTTACG |
| gir_mul_six-1-2_pair9  | CCATAACCCAGCAGATATAGTACGCT | TTCTCTCAGAAATACCTGTGSCAAT  | 41,92 | 17,55 | 24,37 gir_mul_six-1-2 | LS_HCR_gm B1 | GAGGAGGGCAGCAACGAA  | GAAGAGTCTCCCTTACG  | TA | GAGGAGGGCAGCAACGAAAGGTTCTGTTGTGTGAGGTCCCGGTACGATGGGTTTCAACAAGATAGAAGAGTCTCCCTTACG |
| gir_mul_six-1-2_pair10 | CTGTGATTAACGAGGTTATGTGAC   | CCGTGACGCGTTCATCAACAAGTGC  | 42,11 | 26,01 | 16,1 gir_mul_six-1-2  | LS_HCR_gm B1 | GAGGAGGGCAGCAACGAA  | GAAGAGTCTCCCTTACG  | TA | GAGGAGGGCAGCAACGAAAGGTTCTGTTGTGTGAGGTCCCGGTACGATGGGTTTCAACAAGATAGAAGAGTCTCCCTTACG |
| gir_mul_six-1-2_pair11 | CTCCCTCCATAACCGCAATATCCC   | TTCTACTTAAAGTTGCGGGTTACAT  | 43,93 | 18,41 | 25,52 gir_mul_six-1-2 | LS_HCR_gm B1 | GAGGAGGGCAGCAACGAA  | GAAGAGTCTCCCTTACG  | TA | GAGGAGGGCAGCAACGAAAGGTTCTGTTGTGTGAGGTCCCGGTACGATGGGTTTCAACAAGATAGAAGAGTCTCCCTTACG |
| gir_mul_six-1-2_pair12 | TTCAAGCGCTGTGTTCAAGCTCA    | CGTCTCACCGCATAATCAITATAA   | 45,27 | 17,73 | 27,54 gir_mul_six-1-2 | LS_HCR_gm B1 | GAGGAGGGCAGCAACGAA  | GAAGAGTCTCCCTTACG  | TA | GAGGAGGGCAGCAACGAAAGGTTCTGTTGTGTGAGGTCCCGGTACGATGGGTTTCAACAAGATAGAAGAGTCTCCCTTACG |
| gir_mul_six-1-2_pair13 | CACCTGATGGCCGGTGTGTTGCTG   | AAITTTCTAATTCAAGTGACTACAA  | 45,39 | 15,4  | 30 gir_mul_six-1-2    | LS_HCR_gm B1 | GAGGAGGGCAGCAACGAA  | GAAGAGTCTCCCTTACG  | TA | GAGGAGGGCAGCAACGAAAGGTTCTGTTGTGTGAGGTCCCGGTACGATGGGTTTCAACAAGATAGAAGAGTCTCCCTTACG |
| gir_mul_six-1-2_pair14 | CGATGAAGAAATCAACTGATACCC   | AAGAAGAAACCATGAAAATGGAGG   | 45,58 | 21,04 | 24,54 gir_mul_six-1-2 | LS_HCR_gm B1 | GAGGAGGGCAGCAACGAA  | GAAGAGTCTCCCTTACG  | TA | GAGGAGGGCAGCAACGAAAGGTTCTGTTGTGTGAGGTCCCGGTACGATGGGTTTCAACAAGATAGAAGAGTCTCCCTTACG |
| gir_mul_six-1-2_pair15 | AITTCAAGAGCTTTCATGAATATT   | AAGCAGCTGCGCATTCATAGACCA   | 52,38 | 34,68 | 17,69 gir_mul_six-1-2 | LS_HCR_gm B1 | GAGGAGGGCAGCAACGAA  | GAAGAGTCTCCCTTACG  | TA | GAGGAGGGCAGCAACGAAAGGTTCTGTTGTGTGAGGTCCCGGTACGATGGGTTTCAACAAGATAGAAGAGTCTCCCTTACG |
| gir_mul_six-1-2_pair16 | TCGTAAGTACGATAAAAATTTACAC  | TTCCATGTGCGAGTACAAMTTCCAC  | 56,23 | 35,99 | 20,25 gir_mul_six-1-2 | LS_HCR_gm B1 | GAGGAGGGCAGCAACGAA  | GAAGAGTCTCCCTTACG  | TA | GAGGAGGGCAGCAACGAAAGGTTCTGTTGTGTGAGGTCCCGGTACGATGGGTTTCAACAAGATAGAAGAGTCTCCCTTACG |
| gir_mul_six-1-2_pair17 | TGATCTAATCAAAAAATTTAAAG    | CACATGTATATGAATCAGGAAAA    | 73,25 | 37,44 | 35,81 gir_mul_six-1-2 | LS_HCR_gm B1 | GAGGAGGGCAGCAACGAA  | GAAGAGTCTCCCTTACG  | TA | GAGGAGGGCAGCAACGAAAGGTTCTGTTGTGTGAGGTCCCGGTACGATGGGTTTCAACAAGATAGAAGAGTCTCCCTTACG |
| gir_mul_six-1-2_pair18 | CAGTCAGTGAATAAGCTACTGACTG  | TGACTGATAACTGTTCTCGACATTG  | 53,63 | 31,43 | 22,2 gir_mul_six-1-2  | LS_HCR_gm B1 | GTCCCTGCTCTATATCT   | CCACTCAACTTTAACCCG | TT | GTCCCTGCTCTATATCTTTTTCAGTGAAGTGAATCTATGTTGAT                                      |
| gir_mul_six-1-2_pair19 | GAACATCAATTTATTTCTCGACAG   | TTGTAAATTCAGTTTCATGAAAA    | 64,51 | 30,3  | 34,22 gir_mul_six-1-2 | LS_HCR_gm B3 | GTCCCTGCTCTATATCT   | CCACTCAACTTTAACCCG | TT | GTCCCTGCTCTATATCTTTTTCAGTGAAGTGAATCTATGTTGAT                                      |
| gir_mul_six-1-2_pair20 | AAATCTCATAAATGTAAGAACAG    | TGGTGGAAATCAATTTGGGACAT    | 50,26 | 29,68 | 20,58 gir_mul_six-1-2 | LS_HCR_gm B3 | GTCCCTGCTCTATATCT   | CCACTCAACTTTAACCCG | TT | GTCCCTGCTCTATATCTTTTTCAGTGAAGTGAATCTATGTTGAT                                      |
| gir_mul_six-1-2_pair21 | TTATCTATCAATAGTGAACCTTAG   | GGTATGGAAGAGGTTGATGAAAA    | 54,43 | 33,8  | 20,63 gir_mul_six-1-2 | LS_HCR_gm B3 | GTCCCTGCTCTATATCT   | CCACTCAACTTTAACCCG | TT | GTCCCTGCTCTATATCTTTTTCAGTGAAGTGAATCTATGTTGAT                                      |
| gir_mul_six-1-2_pair22 | TTTTGAAGTAAAAATTTGATAGT    | TCACATAGTAAATAGATGGGTATT   | 59,22 | 31,16 | 28,06 gir_mul_six-1-2 | LS_HCR_gm B3 | GTCCCTGCTCTATATCT   | CCACTCAACTTTAACCCG | TT | GTCCCTGCTCTATATCTTTTTCAGTGAAGTGAATCTATGTTGAT                                      |
| gir_mul_six-1-2_pair23 | AGGTGGATTCTGSCAAATCGACTG   | AAAATAATGGGACTGGGTAATTAAG  | 44,86 | 19,84 | 25,02 gir_mul_six-1-2 | LS_HCR_gm B3 | GTCCCTGCTCTATATCT   | CCACTCAACTTTAACCCG | TT | GTCCCTGCTCTATATCTTTTTCAGTGAAGTGAATCTATGTTGAT                                      |
| gir_mul_six-1-2_pair24 | TTTTGAAGAGTAAAAATTTATAT    | TGAAGAAATGAATGGGTTTAAAGTA  | 67,24 | 38,58 | 28,66 gir_mul_six-1-2 | LS_HCR_gm B3 | GTCCCTGCTCTATATCT   | CCACTCAACTTTAACCCG | TT | GTCCCTGCTCTATATCTTTTTCAGTGAAGTGAATCTATGTTGAT                                      |
| gir_mul_six-1-2_pair25 | GATTCGAGATTTCTGGAAAGAACAT  | GACAATTTGGACAGGTCGAACGGAC  | 38,18 | 25,86 | 12,32 gir_mul_six-1-2 | LS_HCR_gm B3 | GTCCCTGCTCTATATCT   | CCACTCAACTTTAACCCG | TT | GTCCCTGCTCTATATCTTTTTCAGTGAAGTGAATCTATGTTGAT                                      |
| gir_mul_six-1-2_pair26 | TTCTTTCAGACAAAGCCAGAAACT   | CCCGCTATGTGGCAATTTAGGGTAG  | 36,34 | 20,98 | 15,35 gir_mul_six-1-2 | LS_HCR_gm B3 | GTCCCTGCTCTATATCT   | CCACTCAACTTTAACCCG | TT | GTCCCTGCTCTATATCTTTTTCAGTGAAGTGAATCTATGTTGAT                                      |
| gir_mul_six-1-2_pair27 | CAAAATGACTGGTTTTGAATACAGT  | TCTGTATGCCATCTAAATGGCCT    | 45,06 | 25,83 | 19,23 gir_mul_six-1-2 | LS_HCR_gm B3 | GTCCCTGCTCTATATCT   | CCACTCAACTTTAACCCG | TT | GTCCCTGCTCTATATCTTTTTCAGTGAAGTGAATCTATGTTGAT                                      |
| gir_mul_six-1-2_pair28 | ATAGCCAAATCAAAAAATGGTCT    | CGATCTAATGAAACCGTTTCCCA    | 48,82 | 25,39 | 23,43 gir_mul_six-1-2 | LS_HCR_gm B3 | GTCCCTGCTCTATATCT   | CCACTCAACTTTAACCCG | TT | GTCCCTGCTCTATATCTTTTTCAGTGAAGTGAATCTATGTTGAT                                      |
| gir_mul_six-1-2_pair29 | TGCTGCGTATGAGTTTTCAGATGCT  | CCACATTTGGGCAATTAATCTCT    | 39,08 | 16,43 | 22,65 gir_mul_six-1-2 | LS_HCR_gm B3 | GTCCCTGCTCTATATCT   | CCACTCAACTTTAACCCG | TT | GTCCCTGCTCTATATCTTTTTCAGTGAAGTGAATCTATGTTGAT                                      |
| gir_mul_six-1-2_pair30 | TCGCTATTTAACGCTCAATTCGAC   | TTATCAACAGTGTATAGTGGTAAA   | 54,66 | 24,39 | 30,27 gir_mul_six-1-2 | LS_HCR_gm B3 | GTCCCTGCTCTATATCT   | CCACTCAACTTTAACCCG | TT | GTCCCTGCTCTATATCTTTTTCAGTGAAGTGAATCTATGTTGAT                                      |
| gm_1329_1_1_4_pair1    | TCGGTGTCTCATGATGCCATCTC    | GTGGCATTTCTCCCTCTAATGCT    | 30,2  | 13,61 | 16,59 gm_1329_1_1_4   | LS_HCR_gm B2 | CTCCTGTAATCTCTATCA  | ATATCCAGTAAACCCGC  | AA | CTCCTGTAATCTCTCAAAAGTGTGAAGTGTGCTGCTGATGCTGCTGCT                                  |
| gm_1329_1_1_4_pair2    | CGTCTGATGATGCTGTTGCTGTGT   | TATGGAAATCGTGGTGGAGTCCCC   | 30,35 | 14,27 | 16,08 gm_1329_1_1_4   | LS_HCR_gm B2 | CTCCTGTAATCTCTATCA  | ATATCCAGTAAACCCGC  | AA | CTCCTGTAATCTCTCAAAAGTGTGAAGTGTGCTGCTGATGCTGCTGCT                                  |
| gm_1329_1_1_4_pair3    | GTGACGCTGCAAAAATAAGTGGCT   | CGTGCACCTGCACACGGTAAATAA   | 30,72 | 14,11 | 16,6 gm_1329_1_1_4    | LS_HCR_gm B2 | CTCCTGTAATCTCTATCA  | ATATCCAGTAAACCCGC  | AA | CTCCTGTAATCTCTCAAAAGTGTGAAGTGTGCTGCTGATGCTGCTGCT                                  |
| gm_1329_1_1_4_pair4    | CGTCTCATGCTTCTCGGGTGTAG    | CCAAATAACAACAAGTCGACGCGCA  | 31,85 | 16,71 | 15,13 gm_1329_1_1_4   | LS_HCR_gm B2 | CTCCTGTAATCTCTATCA  | ATATCCAGTAAACCCGC  | AA | CTCCTGTAATCTCTCAAAAGTGTGAAGTGTGCTGCTGATGCTGCTGCT                                  |
| gm_1329_1_1_4_pair5    | CGAAAAACACGACGGCTGCACAGAC  | AATGTACTGGGAGAATTTGGCGCTA  | 32,28 | 14,69 | 17,59 gm_1329_1_1_4   | LS_HCR_gm B2 | CTCCTGTAATCTCTATCA  | ATATCCAGTAAACCCGC  | AA | CTCCTGTAATCTCTCAAAAGTGTGAAGTGTGCTGCTGATGCTGCTGCT                                  |
| gm_1329_1_1_4_pair6    | TCTCGATTAATCTCAATACGTTGCG  | TGCGGCACAACCTTCTCTGCTGAT   | 32,46 | 18,98 | 13,48 gm_1329_1_1_4   | LS_HCR_gm B2 | CTCCTGTAATCTCTATCA  | ATATCCAGTAAACCCGC  | AA | CTCCTGTAATCTCTCAAAAGTGTGAAGTGTGCTGCTGATGCTGCTGCT                                  |
| gm_1329_1_1_4_pair7    | AITCGATGACTTGTGCGCTTGGGAAT | GAATTTCTGTCGACCAACCAACCCGC | 33,4  | 17,01 | 16,39 gm_1329_1_1_4   | LS_HCR_gm B2 | CTCCTGTAATCTCTATCA  | ATATCCAGTAAACCCGC  | AA | CTCCTGTAATCTCTCAAAAGTGTGAAGTGTGCTGCTGATGCTGCTGCT                                  |
| gm_1329_1_1_4_pair8    | GGTGTAAAACACTGGGACCATCGC   | AGAGGTGCGTCAGAGAAATAGGTAAT | 34,61 | 17,41 | 17,21 gm_1329_1_1_4   | LS_HCR_gm B2 | CTCCTGTAATCTCTATCA  | ATATCCAGTAAACCCGC  | AA | CTCCTGTAATCTCTCAAAAGTGTGAAGTGTGCTGCTGATGCTGCTGCT                                  |
| gm_1329_1_1_4_pair9    | TTCTCCCAACGAGTTCGCCACTGCG  | TAGTGTGGAGGATGGCACCCCGATG  | 34,75 | 15,12 | 19,63 gm_1329_1_1_4   | LS_HCR_gm B2 | CTCCTGTAATCTCTATCA  | ATATCCAGTAAACCCGC  | AA | CTCCTGTAATCTCTCAAAAGTGTGAAGTGTGCTGCTGATGCTGCTGCT                                  |
| gm_1329_1_1_4_pair10   | CCCAAGGATCATAGCAAGTITTCGA  | TCGTCGGTGCATTTTCAAAATTAAG  | 35,5  | 13,72 | 21,77 gm_1329_1_1_4   | LS_HCR_gm B2 | CTCCTGTAATCTCTATCA  | ATATCCAGTAAACCCGC  | AA | CTCCTGTAATCTCTCAAAAGTGTGAAGTGTGCTGCTGATGCTGCTGCT                                  |
| gm_1329_1_1_4_pair11   | CTCGTAATAATGAATCTTGGCG     | ACGCAACTGAGAAATCCAGCACTCC  | 36,27 | 23,75 | 12,52 gm_1329_1_1_4   | LS_HCR_gm B2 | CTCCTGTAATCTCTATCA  | ATATCCAGTAAACCCGC  | AA | CTCCTGTAATCTCTCAAAAGTGTGAAGTGTGCTGCTGATGCTGCTGCT                                  |
| gm_1329_1_1_4_pair12   | AITTTCGACGAGTATTTCTCTGTCTC | CTTGTCTCAGGTTCTGATGAGAGGAA | 36,88 | 19,24 | 17,64 gm_1329_1_1_4   | LS_HCR_gm B2 | CTCCTGTAATCTCTATCA  | ATATCCAGTAAACCCGC  | AA | CTCCTGTAATCTCTCAAAAGTGTGAAGTGTGCTGCTGATGCTGCTGCT                                  |
| gm_1329_1_1_4_pair13   | CTTTTGGGCTCTTCAACTCTCCG    | CGGGGATGATAAACTTGTATCAGG   | 37    | 15,53 | 21,47 gm_1329_1_1_4   | LS_HCR_gm B2 | CTCCTGTAATCTCTATCA  | ATATCCAGTAAACCCGC  | AA | CTCCTGTAATCTCTCAAAAGTGTGAAGTGTGCTGCTGATGCTGCTGCT                                  |
| gm_1329_1_1_4_pair14   | AAAACAGAACTCTCAATCAACACAG  | CGAATTTGGTGGCTGATAAAGACT   | 40,67 | 23,84 | 16,83 gm_1329_1_1_4   | LS_HCR_gm B2 | CTCCTGTAATCTCTATCA  | ATATCCAGTAAACCCGC  | AA | CTCCTGTAATCTCTCAAAAGTGTGAAGTGTGCTGCTGATGCTGCTGCT                                  |
| gm_1329_1_1_4_pair15   | AITTGGGCTTCCGCCATCTTAAG    | AATCTTTGCTCAACAATGCTATACC  | 43,67 | 24,78 | 18,89 gm_1329_1_1_4   | LS_HCR_gm B2 | CTCCTGTAATCTCTATCA  | ATATCCAGTAAACCCGC  | AA | CTCCTGTAATCTCTCAAAAGTGTGAAGTGTGCTGCTGATGCTGCTGCT                                  |
| gm_1329_1_1_4_pair16   | AITTCCCTCCGATTTTATGCAACAA  | TTAGGATTTAAGTTTAAACCGCGCT  | 44,22 | 21,4  | 22,82 gm_1329_1_1_4   | LS_HCR_gm B2 | CTCCTGTAATCTCTATCA  | ATATCCAGTAAACCCGC  | AA | CTCCTGTAATCTCTCAAAAGTGTGAAGTGTGCTGCTGATGCTGCTGCT                                  |
| gm_1329_1_1_4_pair17   | AITTTCGGTGTGATTTAATATCACT  | ACCTCCCAAAATTTCAACTGCTGG   | 44,41 | 28,84 | 15,57 gm_1329_1_1_4   | LS_HCR_gm B2 | CTCCTGTAATCTCTATCA  | ATATCCAGTAAACCCGC  | AA | CTCCTGTAATCTCTCAAAAGTGTGAAGTGTGCTGCTGATGCTGCTGCT                                  |
| gm_1329_1_1_4_pair18   | AAAAGCGCTTCTCAATCTGCTGCT   | CGAGTATAACAGACGCTTAAGAGT   | 47,32 | 21,39 | 25,94 gm_1329_1_1_4   | LS_HCR_gm B2 | CTCCTGTAATCTCTATCA  | ATATCCAGTAAACCCGC  | AA | CTCCTGTAATCTCTCAAAAGTGTGAAGTGTGCTGCTGATGCTGCTGCT                                  |
| gm_1329_1_1_4_pair19   | AACGGCCGCTGGCTTAAATATAA    | TTCTCAGAAACAACGCTGCTCAAACT | 47,35 | 25,69 | 21,66 gm_1329_1_1_4   | LS_HCR_gm B2 | CTCCTGTAATCTCTATCA  | ATATCCAGTAAACCCGC  | AA | CTCCTGTAATCTCTCAAAAGTGTGAAGTGTGCTGCTGATGCTGCTGCT                                  |
| gm_1329_1_1_4_pair20   | CGTTTAAATGCAAGAAATCAAGCACT | CGAATTTCTAGATTCGAGGCAATG   | 47,76 | 26,16 | 21,6 gm_1329_1_1_4    | LS_HCR_gm B2 | CTCCTGTAATCTCTATCA  | ATATCCAGTAAACCCGC  | AA | CTCCTGTAATCTCTCAAAAGTGTGAAGTGTGCTGCTGATGCTGCTGCT                                  |
| gm_2585_0_1_3_pair1    | TCGCAATTCGGGCACTTGGCATCT   | ACTTCTGCTCAATCCCGGCACT     | 26,7  | 15,75 | 10,95 gm_2585_0_1_3   | LS_HCR_gm B5 | CTCACTCCAATCTCTAT   | CTACCTCAAAATCCAA   | AA | CTCACTCCAATCTCTATAAGCAAGTTTAGAGCAATGTGGACA                                        |
| gm_2585_0_1_3_pair2    | GGCAAGTTAGAGCAATGTGGACA    | GGACTAGAGAAATGGGTCGCAATC   | 33,47 | 16,82 | 16,65 gm_2585_0_1_3   | LS_HCR_gm B5 | CTCACTCCAATCTCTAT   | CTACCTCAAAATCCAA   | AA | CTCACTCCAATCTCTATAAGCAAGTTTAGAGCAATGTGGACA                                        |
| gm_2585_0_1_3_pair3    | ACGGAAGTGGTCCATGATGAAGTTC  | CCACTGTTGTTGGTCTGACGGTA    | 34,61 | 18,31 | 16,3 gm_2585_0_1_3    | LS_HCR_gm B5 | CTCACTCCAATCTCTAT   | CTACCTCAAAATCCAA   | AA | CTCACTCCAATCTCTATAAGCAAGTTTAGAGCAATGTGGACA                                        |
| gm_2585_0_1_3_pair4    | TCGACGCTTCTAGCTTCTGCTCTC   | TTCTGTGGCATGGATCCAGGACGC   | 34,9  | 18,04 | 16,87 gm_2585_0_1_3   | LS_HCR_gm B5 | CTCACTCCAATCTCTAT   | CTACCTCAAAATCCAA   | AA | CTCACTCCAATCTCTATAAGCAAGTTTAGAGCAATGTGGACA                                        |
| gm_2585_0_1_3_pair5    | TCCAAGCTTTCAGGACTCTACT     | TGGATGAAGCTCCAATAAGAACCC   | 36,65 | 17,91 | 18,74 gm_2585_0_1_3   | LS_HCR_gm B5 | CTCACTCCAATCTCTAT   | CTACCTCAAAATCCAA   | AA | CTCACTCCAATCTCTATAAGCAAGTTTAGAGCAATGTGGACA                                        |
| gm_2585_0_1_3_pair6    | GGCGGGCTATAGACTTACTTGGGGA  | CTCGAGTCAATGATGATCCAGCT    | 36,77 | 16,52 | 20,25 gm_2585_0_1_3   | LS_HCR_gm B5 | CTCACTCCAATCTCTAT   | CTACCTCAAAATCCAA   | AA | CTCACTCCAATCTCTATAAGCAAGTTTAGAGCAATGTGGACA                                        |
| gm_2585_0_1_3_pair7    | GGCGGGATTTAAGATTTTGAAGT    | TGTGAGGCTGCTCATGTCGATGCT   | 37,02 | 24,51 | 12,51 gm_2585_0_1_3   | LS_HCR_gm B5 | CTCACTCCAATCTCTAT   | CTACCTCAAAATCCAA   | AA | CTCACTCCAATCTCTATAAGCAAGTTTAGAGCAATGTGGACA                                        |
| gm_2585_0_1_3_pair8    | AATTTAGCAGCGCTGGGACGAGAA   | TGAGATCCCACTGGATTCATACCTG  | 37,99 | 13,05 | 24,94 gm_2585_0_1_3   | LS_HCR_gm B5 | CTCACTCCAATCTCTAT   | CTACCTCAAAATCCAA   | AA | CTCACTCCAATCTCTATAAGCAAGTTTAGAGCAATGTGGACA                                        |
| gm_2585_0_1_3_pair9    | TCATTTACCCTGGAGCAGTTTTC    | GGGGTGTGGAGGTTGACTGGACAT   | 38    | 23,5  | 14,5 gm_2585_0_1_3    | LS_HCR_gm B5 | CTCACTCCAATCTCTAT   | CTACCTCAAAATCCAA   | AA | CTCACTCCAATCTCTATAAGCAAGTTTAGAGCAATGTGGACA                                        |

|                      |                           |                           |       |       |       |                            |                    |    |                     |    |                                                      |                                               |
|----------------------|---------------------------|---------------------------|-------|-------|-------|----------------------------|--------------------|----|---------------------|----|------------------------------------------------------|-----------------------------------------------|
| gm_2585_0_1_3_pair10 | TCGGCATTACACTGCTTCTTGAG   | TGTTTGATATTGGCCTTGAATCGC  | 40,49 | 21,63 | 18,86 | gm_2585_0_1_3 LS_HCR_gm B5 | CTCACTCCCAATCTCTAT | AA | CTACCCCTACAAATCCAAT | AA | CTCACTCCCAATCTCTATAAAGTAAAGGATACGGCATTACACTTGTCTTGAG | TGTTTGATATTGGCCTTGAATCGCAACTACCCCTACAAATCCAAT |
| gm_2585_0_1_3_pair11 | GGTAAGGATACGGAACCTTTGTCGT | TACGGATGACCCAGAGAGATATGG  | 40,78 | 21,03 | 19,75 | gm_2585_0_1_3 LS_HCR_gm B5 | CTCACTCCCAATCTCTAT | AA | CTACCCCTACAAATCCAAT | AA | TACGGATGACCCAGAGAGATATGGAACCTACCCCTACAAATCCAAT       |                                               |
| gm_2585_0_1_3_pair12 | AACGTAAAGGAGTTTCGCATGGGT  | GAATCGCCATTGTTATTAACCTGAT | 42,45 | 14,35 | 28,1  | gm_2585_0_1_3 LS_HCR_gm B5 | CTCACTCCCAATCTCTAT | AA | CTACCCCTACAAATCCAAT | AA | GAATCGCCATTGTTATTAACCTGATAACTACCCCTACAAATCCAAT       |                                               |
| gm_2585_0_1_3_pair13 | TATCACTGTTACTTGGCAGGGCACT | GGGTCACTTACTGATCTAAAGGCT  | 43,86 | 20,59 | 23,26 | gm_2585_0_1_3 LS_HCR_gm B5 | CTCACTCCCAATCTCTAT | AA | CTACCCCTACAAATCCAAT | AA | GGGTCACTTACTGATCTAAAGGCTAACTACCCCTACAAATCCAAT        |                                               |
| gm_2585_0_1_3_pair14 | CGATCGATTGAAATGGATTACTGG  | CGCGCTGCTAAACTAGGATGCATCA | 44,56 | 27,67 | 16,89 | gm_2585_0_1_3 LS_HCR_gm B5 | CTCACTCCCAATCTCTAT | AA | CTACCCCTACAAATCCAAT | AA | CGCGCTGCTAAACTAGGATGCATCAAACTACCCCTACAAATCCAAT       |                                               |
| gm_2585_0_1_3_pair15 | ATATGTCAGAGATCCTGGTAAACTG | TGAATTGTGTTGGGAACCTTCGTAT | 46,62 | 24,11 | 22,51 | gm_2585_0_1_3 LS_HCR_gm B5 | CTCACTCCCAATCTCTAT | AA | CTACCCCTACAAATCCAAT | AA | TGAATTGTGTTGGGAACCTTCGTATAACTACCCCTACAAATCCAAT       |                                               |
| gm_2585_0_1_3_pair16 | CTCGTACTTGGTTAACGATCACTCT | TTTTCCCAACATCTTTATCAACA   | 50,59 | 21,62 | 28,97 | gm_2585_0_1_3 LS_HCR_gm B5 | CTCACTCCCAATCTCTAT | AA | CTACCCCTACAAATCCAAT | AA | TTTTCCCAACATCTTTATCAACAACCTACCCCTACAAATCCAAT         |                                               |
| gm_2585_0_1_3_pair17 | TGGATTATAATGATGTTGAGGTGGT | TTGTTGACTTGAATAAACTGTTGA  | 54,99 | 26,68 | 28,31 | gm_2585_0_1_3 LS_HCR_gm B5 | CTCACTCCCAATCTCTAT | AA | CTACCCCTACAAATCCAAT | AA | TTGTTGACTTGAATAAACTGTTGAACTACCCCTACAAATCCAAT         |                                               |
| gm_2585_0_1_3_pair18 | GAATTCCTATCTCTGGACTTTCGC  | TGATATGGACGATTATTATGGAAA  | 55,99 | 25,65 | 30,34 | gm_2585_0_1_3 LS_HCR_gm B5 | CTCACTCCCAATCTCTAT | AA | CTACCCCTACAAATCCAAT | AA | TGATATGGACGATTATTATGGAAAACTACCCCTACAAATCCAAT         |                                               |
| gm_2585_0_1_3_pair19 | TGCTTCTTAAATAACACCACTTTT  | TCTCGATGAGGATCTTTGAATCTCT | 61,85 | 33,17 | 28,67 | gm_2585_0_1_3 LS_HCR_gm B5 | CTCACTCCCAATCTCTAT | AA | CTACCCCTACAAATCCAAT | AA | TCTCGATGAGGATCTTTGAATCTCTAACTACCCCTACAAATCCAAT       |                                               |
